# Supplementary material for: Cesium carbonate-promoted synthesis of aryl methyl sulfides using S-methylisothiourea sulfate under transition-metal-free conditions
Source: Royal Society of Chemistry journal article supplement (doi:10.1039/c8ob01758a), 2018-01-01
Supplement: c8ob01758a1.pdf [file c8ob01758a1.pdf]

## *Supplementary Information*

### **Cesium carbonate-promoted synthesis of aryl methyl sulfides using S-methylisothiourea sulfate under transition-metal-free conditions**

*Caiyang Zhang, You Zhou, Jintao Huang, Canhui Tu, Xiaoi Zhou, Guodong Yin\**

*Hubei Collaborative Innovation Center for Rare Metal Chemistry, Hubei Key  
Laboratory of Pollutant Analysis and Reuse Technology, Hubei Normal University,  
Huangshi 435002, China*

*E-mail: gdyin@hbnu.edu.cn*

### *Contents*

1. Characterization data for compounds **3~5**.....S1-S10
2. <sup>1</sup>H and <sup>13</sup>C NMR spectra of compounds **3~5**.....S11-S54

## 1. Characterization data for compounds 3~5

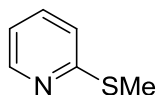

### 2-(Methylthio)pyridine (3a).<sup>[1]</sup>

Yield 99% (62 mg); yellow oil; <sup>1</sup>H NMR (300 MHz, CDCl<sub>3</sub>) δ: 8.33 (d, *J* = 4.8 Hz, 1H), 7.38–7.32 (m, 1H), 7.06 (d, *J* = 8.1 Hz, 1H), 6.87–6.83 (m, 1H), 2.45 (s, 3H); <sup>13</sup>C NMR (75 MHz, CDCl<sub>3</sub>) δ: 159.7, 149.2, 135.6, 121.2, 118.9, 13.0.

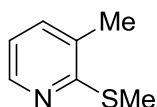

### 3-Methyl-2-(methylthio)pyridine (3b).<sup>[2]</sup>

Yield 90% (63 mg); yellow oil; <sup>1</sup>H NMR (300 MHz, CDCl<sub>3</sub>) δ: 8.31 (dd, *J*<sub>1</sub> = 4.8 Hz, *J*<sub>2</sub> = 1.0 Hz, 1H), 7.30–7.27 (m, 1H), 6.92–6.88 (m, 1H), 2.58 (s, 3H), 2.25 (s, 3H); <sup>13</sup>C NMR (75 MHz, CDCl<sub>3</sub>) δ: 158.5, 146.5, 135.9, 130.7, 118.7, 18.4, 12.8.

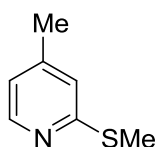

### 4-Methyl-2-(methylthio)pyridine (3c).<sup>[3]</sup>

Yield 85% (59 mg); yellow oil; <sup>1</sup>H NMR (300 MHz, CDCl<sub>3</sub>) δ: 8.29 (d, *J* = 5.1 Hz, 1H), 7.00 (s, 1H), 6.79 (d, *J* = 5.0 Hz, 1H), 2.55 (s, 3H), 2.27 (s, 3H); <sup>13</sup>C NMR (75 MHz, CDCl<sub>3</sub>) δ: 159.6, 149.0, 146.9, 121.8, 120.5, 20.8, 13.2.

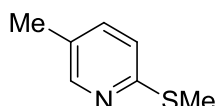

### 5-Methyl-2-(methylthio)pyridine (3d).<sup>[4]</sup>

Yield 80% (56 mg); yellow oil; <sup>1</sup>H NMR (300 MHz, CDCl<sub>3</sub>) δ: 8.27 (s, 1H), 7.30 (dd, *J*<sub>1</sub> = 8.2 Hz, *J*<sub>2</sub> = 1.9 Hz, 1H), 7.07 (d, *J* = 8.2 Hz, 1H), 2.54 (s, 3H), 2.25 (s, 3H); <sup>13</sup>C NMR (75 MHz, CDCl<sub>3</sub>) δ: 156.4, 149.5, 136.7, 128.4, 120.8, 17.7, 13.3.

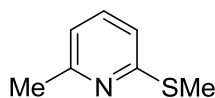

### 2-Methyl-6-(methylthio)pyridine (3e).<sup>[5]</sup>

Yield 90% (63 mg); yellow oil; <sup>1</sup>H NMR (300 MHz, CDCl<sub>3</sub>) δ: 7.37 (t, *J* = 7.7 Hz, 1H), 6.95 (d, *J* = 8.0 Hz, 1H), 6.81 (d, *J* = 7.5 Hz, 1H), 2.53 (s, 3H), 2.49 (s, 3H); <sup>13</sup>C NMR (75 MHz, CDCl<sub>3</sub>) δ: 159.0, 158.1, 136.1, 118.4, 117.7, 24.3, 13.3.

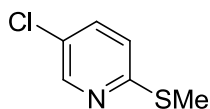

**5-Chloro-2-(methylthio)pyridine (3f).**<sup>[6]</sup>

Yield 86% (69 mg); yellow oil; <sup>1</sup>H NMR (300 MHz, CDCl<sub>3</sub>) δ: 8.39 (s, 1H), 7.44 (dd, *J*<sub>1</sub> = 8.5 Hz, *J*<sub>2</sub> = 2.1 Hz, 1H), 7.11 (d, *J* = 8.5 Hz, 1H), 2.54 (s, 3H); <sup>13</sup>C NMR (75 MHz, CDCl<sub>3</sub>) δ: 158.1, 148.0, 135.5, 127.4, 122.0, 13.4.

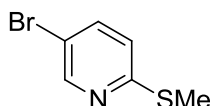

**5-Bromo-2-(methylthio)pyridine (3g).**<sup>[6]</sup>

Yield 84% (86 mg); yellow oil; <sup>1</sup>H NMR (300 MHz, CDCl<sub>3</sub>) δ: 8.47 (d, *J* = 2.1 Hz, 1H), 7.57–7.52 (m, 1H), 7.07–7.03 (m, 1H), 2.52 (s, 3H); <sup>13</sup>C NMR (75 MHz, CDCl<sub>3</sub>) δ: 158.5, 150.0, 138.0, 122.4, 115.5, 13.3; ESI-MS: *m/z* 203.76 [M+H]<sup>+</sup>.

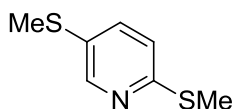

**2,5-Bis(methylthio)pyridine (3h).**<sup>[7]</sup>

Yield 80% (69 mg); yellow oil; <sup>1</sup>H NMR (300 MHz, CDCl<sub>3</sub>) δ: 8.25 (s, 1H), 7.30 (dd, *J*<sub>1</sub> = 8.3 Hz, *J*<sub>2</sub> = 2.2 Hz, 1H), 6.97 (d, *J* = 8.3 Hz, 1H), 2.43 (s, 3H), 2.34 (s, 3H); <sup>13</sup>C NMR (75 MHz, CDCl<sub>3</sub>) δ: 156.8, 148.2, 135.5, 129.7, 121.1, 16.7, 13.1; ESI-MS: *m/z* 171.80 [M+H]<sup>+</sup>.

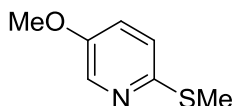

**5-Methoxy-2-(methylthio)pyridine (3i, new compound)**

Yield 92% (71 mg); yellow oil; IR (KBr)  $\nu$  3441, 2965, 1732, 1670, 1594, 1413, 1232, 1019, 764, 487 cm<sup>-1</sup>; <sup>1</sup>H NMR (300 MHz, CDCl<sub>3</sub>) δ: 8.17 (s, 1H), 7.10 (s, 2H), 3.81 (s, 3H), 2.54 (s, 3H); <sup>13</sup>C NMR (75 MHz, CDCl<sub>3</sub>) δ: 153.1, 150.4, 136.2, 122.3, 121.8, 55.6, 13.8; HRMS (ESI): *m/z* calcd for C<sub>7</sub>H<sub>9</sub>NOS: 156.0478, found: 156.0484 [M+H]<sup>+</sup>.

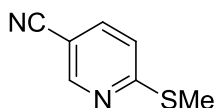

**6-(Methylthio)nicotinonitrile (3j).**<sup>[8]</sup>

Yield 98% (74 mg); yellow solid; <sup>1</sup>H NMR (300 MHz, CDCl<sub>3</sub>) δ: 8.67 (d, *J* = 1.4 Hz, 1H), 7.66 (dd, *J*<sub>1</sub> = 8.5 Hz, *J*<sub>2</sub> = 2.2 Hz, 1H), 7.27 (d, *J* = 8.1 Hz, 1H), 2.59 (s, 3H); <sup>13</sup>C NMR (75 MHz, CDCl<sub>3</sub>) δ: 166.0, 152.2, 137.5, 121.3, 117.1, 104.4, 13.2.

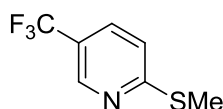

**2-(Methylthio)-5-(trifluoromethyl)pyridine (3k).**<sup>[9]</sup>

Yield 98% (95 mg); yellow solid; <sup>1</sup>H NMR (300 MHz, CDCl<sub>3</sub>) δ: 8.68 (s, 1H), 7.65 (dd, *J*<sub>1</sub> = 8.5 Hz, *J*<sub>2</sub> = 2.3 Hz, 1H), 7.26 (d, *J* = 8.6 Hz, 1H), 2.59 (s, 3H); <sup>13</sup>C NMR (75 MHz, CDCl<sub>3</sub>) δ: 164.9, 146.2 (q, <sup>3</sup>*J*<sub>C-F</sub> = 4.2 Hz), 132.3 (q, <sup>3</sup>*J*<sub>C-F</sub> = 3.4 Hz), 123.8 (q, <sup>1</sup>*J*<sub>C-F</sub> = 269.8 Hz), 121.9 (q, <sup>2</sup>*J*<sub>C-F</sub> = 32.8 Hz), 121.0, 13.1.

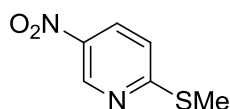

**2-(Methylthio)-5-nitropyridine (3l).**<sup>[10]</sup>

Yield 88% (75 mg); yellow solid; <sup>1</sup>H NMR (300 MHz, CDCl<sub>3</sub>) δ: 9.25 (d, *J* = 2.2 Hz, 1H), 8.23 (dd, *J*<sub>1</sub> = 8.9 Hz, *J*<sub>2</sub> = 2.7 Hz, 1H), 7.30 (dd, *J*<sub>1</sub> = 8.9 Hz, *J*<sub>2</sub> = 0.5 Hz, 1H), 2.65 (s, 3H); <sup>13</sup>C NMR (75 MHz, CDCl<sub>3</sub>) δ: 168.4, 145.0, 141.0, 130.1, 121.0, 13.5.

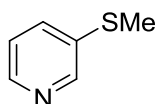

**3-(Methylthio)pyridine (3m).**<sup>[11]</sup>

Yield 80% (50 mg); yellow oil; <sup>1</sup>H NMR (300 MHz, CDCl<sub>3</sub>) δ: 8.52 (s, 1H), 8.38 (s, 1H), 7.57 (d, *J* = 8.0 Hz, 1H), 7.23–7.19 (m, 1H), 2.51 (s, 3H); <sup>13</sup>C NMR (75 MHz, CDCl<sub>3</sub>) δ: 147.9, 146.2, 135.5, 134.3, 123.5, 15.8.

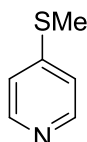

**4-(Methylthio)pyridine (3n).**<sup>[12]</sup>

Yield 96% (60 mg); yellow oil; <sup>1</sup>H NMR (300 MHz, CDCl<sub>3</sub>) δ: 8.32 (s, 2H), 7.01 (d, *J* = 3.6 Hz, 2H), 2.39 (s, 3H); <sup>13</sup>C NMR (75 MHz, CDCl<sub>3</sub>) δ: 150.1, 148.9, 119.8, 13.5.

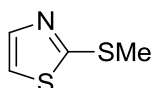

**2-(methylthio)thiazole (3o).**<sup>[13]</sup>

Yield 97% (64 mg); yellow solid; <sup>1</sup>H NMR (300 MHz, CDCl<sub>3</sub>) δ: 7.64 (d, *J* = 3.2 Hz, 1H), 7.20 (d, *J* = 3.3 Hz, 1H), 2.69 (s, 3H); <sup>13</sup>C NMR (75 MHz, CDCl<sub>3</sub>) δ: 166.3, 142.5, 118.1, 16.5.

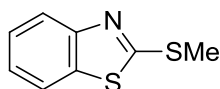

**2-(Methylthio)benzo[d]thiazole (3p).**<sup>[14]</sup>

Yield 95% (86 mg); yellow solid; <sup>1</sup>H NMR (300 MHz, CDCl<sub>3</sub>) δ: 7.85 (d, *J* = 7.8 Hz, 1H), 7.70 (dd, *J*<sub>1</sub> = 7.9 Hz, *J*<sub>2</sub> = 0.5 Hz, 1H), 7.40–7.35 (m, 1H), 7.27–7.21 (m, 1H), 2.74 (s, 3H); <sup>13</sup>C NMR (75 MHz, CDCl<sub>3</sub>) δ: 167.9, 153.1, 134.9, 125.9, 123.9, 121.2, 120.8, 15.7; ESI-MS: *m/z* 181.82 [M+H]<sup>+</sup>.

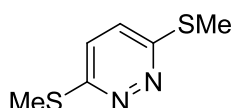

**3,6-Bis(methylthio)pyridazine (3q).**<sup>[15]</sup>

Yield 97% (84 mg); yellow solid; <sup>1</sup>H NMR (300 MHz, CDCl<sub>3</sub>) δ: 7.09 (s, 2H), 2.69 (s, 6H); <sup>13</sup>C NMR (75 MHz, CDCl<sub>3</sub>) δ: 158.9, 125.0, 13.2; ESI-MS: *m/z* 172.70 [M+H]<sup>+</sup>.

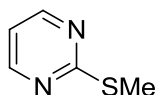

**2-(Methylthio)pyrimidine (3r).**<sup>[14]</sup>

Yield 99% (62 mg); yellow solid; <sup>1</sup>H NMR (300 MHz, CDCl<sub>3</sub>) δ: 8.44 (d, *J* = 4.8 Hz, 2H), 6.88 (t, *J* = 4.8 Hz, 1H), 2.49 (s, 3H); <sup>13</sup>C NMR (75 MHz, CDCl<sub>3</sub>) δ: 172.7, 156.9, 116.1, 13.9.

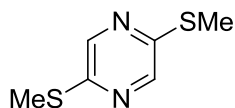

**2,5-Bis(methylthio)pyrazine (3s).**<sup>[16]</sup>

Yield 97% (84 mg); yellow solid; <sup>1</sup>H NMR (300 MHz, CDCl<sub>3</sub>) δ: 8.30 (s, 2H), 2.55 (s, 6H); <sup>13</sup>C NMR (75 MHz, CDCl<sub>3</sub>) δ: 151.6, 142.3, 13.2; ESI-MS: *m/z* 172.70 [M+H]<sup>+</sup>.

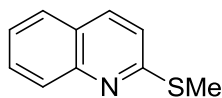

**2-(Methylthio)quinoline (3t).**<sup>[17]</sup>

Yield 92% (81 mg); white solid; <sup>1</sup>H NMR (300 MHz, CDCl<sub>3</sub>) δ: 7.93 (d, *J* = 8.4 Hz, 1H), 7.79 (d, *J* = 8.6 Hz, 1H), 7.65–7.57 (m, 2H), 7.37 (t, *J* = 7.3 Hz, 1H), 7.17 (d, *J* = 8.6 Hz, 1H), 2.68 (s, 3H); <sup>13</sup>C NMR (75 MHz, CDCl<sub>3</sub>) δ: 159.8, 148.3, 135.0, 129.5, 127.9, 127.5, 125.8, 125.0, 120.5, 12.8; ESI-MS: *m/z* 175.85 [M+H]<sup>+</sup>.

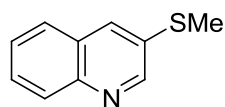

**3-(Methylthio)quinoline (3u).**<sup>[1]</sup>

Yield 95% (93 mg); yellow oil; <sup>1</sup>H NMR (300 MHz, CDCl<sub>3</sub>) δ: 8.79 (s, 1H), 8.05 (d, *J* = 8.4 Hz, 1H), 7.84 (*J* = 2.2 Hz, 1H), 7.70–7.59 (m, 2H), 7.52–7.47 (m, 1H), 2.56 (s, 3H); <sup>13</sup>C NMR (75 MHz, CDCl<sub>3</sub>) δ: 149.7, 145.7, 132.6, 131.1, 129.1, 128.5, 128.2, 127.1, 126.5, 15.6; ESI-MS: *m/z* 175.83 [M+H]<sup>+</sup>.

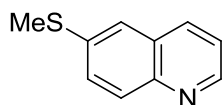

**6-(Methylthio)quinoline (3v).**<sup>[1]</sup>

Yield 88% (77 mg); yellow oil; <sup>1</sup>H NMR (300 MHz, CDCl<sub>3</sub>) δ: 8.77–8.76 (m, 1H), 7.95 (d, *J* = 8.9 Hz, 1H), 7.89 (d, *J* = 8.2 Hz, 1H), 7.52 (dd, *J*<sub>1</sub> = 8.9 Hz, *J*<sub>2</sub> = 2.1 Hz, 1H), 7.40 (d, *J* = 1.8 Hz, 1H), 7.27–7.23 (m, 1H), 2.49 (s, 3H); <sup>13</sup>C NMR (75 MHz, CDCl<sub>3</sub>) δ: 148.9, 145.9, 137.0, 134.2, 129.1, 128.4, 128.3, 121.9, 121.1, 15.1; ESI-MS: *m/z* 175.86 [M+H]<sup>+</sup>.

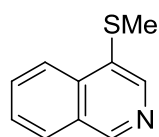

**4-(Methylthio)isoquinoline (3w).**<sup>[18]</sup>

Yield 95% (83 mg); yellow oil; <sup>1</sup>H NMR (300 MHz, CDCl<sub>3</sub>) δ: 9.03 (s, 1H), 8.39 (s, 1H), 8.13 (d, *J* = 8.4 Hz, 1H), 7.87 (d, *J* = 8.0 Hz, 1H), 7.68 (t, *J* = 7.2 Hz, 1H), 7.55 (t, *J* = 7.8 Hz, 1H), 2.54 (s, 3H); <sup>13</sup>C NMR (75 MHz, CDCl<sub>3</sub>) δ: 149.9, 140.3, 134.0, 130.2, 130.1, 127.7, 127.3, 123.1, 15.9; ESI-MS: *m/z* 175.92 [M+H]<sup>+</sup>.

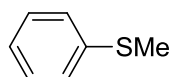

**Methyl(phenyl)sulfane (4a).**<sup>[11]</sup>

Yield 82% (51 mg); yellow oil; <sup>1</sup>H NMR (300 MHz, CDCl<sub>3</sub>) δ: 7.28–7.25 (m, 5H), 2.48 (s, 3H); <sup>13</sup>C NMR (75 MHz, CDCl<sub>3</sub>) δ: 138.4, 128.8, 126.6, 125.0, 15.8.

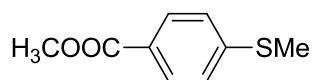

**Methyl 4-(methylthio)benzoate (4b).**<sup>[19]</sup>

Yield 93% (91 mg); yellow solid; <sup>1</sup>H NMR (300 MHz, CDCl<sub>3</sub>) δ: 7.93 (d, *J* = 8.6 Hz, 2H), 7.24 (d, *J* = 8.6 Hz, 2H), 3.89 (s, 3H), 2.51 (s, 3H); <sup>13</sup>C NMR (75 MHz, CDCl<sub>3</sub>) δ: 166.8, 145.4, 129.8, 126.2, 124.9, 51.9, 14.8.

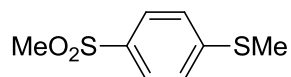

**Methyl(4-(methylsulfonyl)phenyl)sulfane (4c).**<sup>[20]</sup>

Yield 97% (98 mg); white solid; <sup>1</sup>H NMR (300 MHz, CDCl<sub>3</sub>) δ: 7.82 (d, *J* = 8.6 Hz, 2H), 7.35 (d, *J* = 8.6 Hz, 2H), 3.04 (s, 3H), 2.54 (s, 3H); <sup>13</sup>C NMR (75 MHz, CDCl<sub>3</sub>) δ: 147.1, 136.1, 127.5, 125.4, 44.6, 14.7.

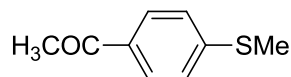

**1-(4-(Methylthio)phenyl)ethanone (4d).**<sup>[21]</sup>

Yield 96% (80 mg); white solid; <sup>1</sup>H NMR (300 MHz, CDCl<sub>3</sub>) δ: 7.86 (d, *J* = 8.5 Hz, 2H), 7.26 (d, *J* = 8.5 Hz, 2H), 2.56 (s, 3H), 2.52 (s, 3H); <sup>13</sup>C NMR (75 MHz, CDCl<sub>3</sub>) δ: 197.1, 145.8, 133.4, 128.6, 124.9, 26.3, 14.7.

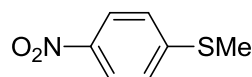

**Methyl(4-nitrophenyl)sulfane (4e).**<sup>[1]</sup>

Yield 96% (81 mg); yellow solid; <sup>1</sup>H NMR (300 MHz, CDCl<sub>3</sub>) δ: 8.12 (d, *J* = 8.9 Hz, 2H), 7.28 (d, *J* = 8.8 Hz, 2H), 2.55 (s, 3H); <sup>13</sup>C NMR (75 MHz, CDCl<sub>3</sub>) δ: 148.8, 144.6, 124.9, 123.8, 14.7.

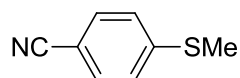

**4-(Methylthio)benzonitrile (4f).**<sup>[1]</sup>

Yield 92% (69 mg); white solid; <sup>1</sup>H NMR (300 MHz, CDCl<sub>3</sub>) δ: 7.51 (d, *J* = 8.5 Hz, 2H), 7.25 (d, *J* = 8.5 Hz, 2H), 2.50 (s, 3H); <sup>13</sup>C NMR (75 MHz, CDCl<sub>3</sub>) δ: 145.9, 131.9, 125.2, 118.7, 107.3, 14.4.

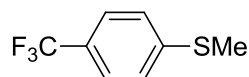

**Methyl(4-(trifluoromethyl)phenyl)sulfane (4g).**<sup>[1]</sup>

Yield 97% (93 mg); yellow solid; <sup>1</sup>H NMR (300 MHz, CDCl<sub>3</sub>) δ: 7.50 (d, *J* = 8.3 Hz, 2H), 7.28 (d, *J* = 8.3 Hz, 2H), 2.48 (s, 3H); <sup>13</sup>C NMR (75 MHz, CDCl<sub>3</sub>) δ: 144.0, 127.1 (q, <sup>2</sup>*J*<sub>C-F</sub> = 32.5 Hz), 124.3 (q, <sup>1</sup>*J*<sub>C-F</sub> = 269.7 Hz), 125.9, 125.6 (q, <sup>3</sup>*J*<sub>C-F</sub> = 3.7 Hz), 15.1.

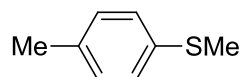

**Methyl(p-tolyl)sulfane (4h).**<sup>[1]</sup>

Yield 83% (57 mg); yellow solid; <sup>1</sup>H NMR (300 MHz, CDCl<sub>3</sub>) δ: 7.18 (d, *J* = 7.4 Hz, 2H), 7.09 (d, *J* = 7.9 Hz, 2H), 2.45 (s, 3H), 2.31 (s, 3H); <sup>13</sup>C NMR (75 MHz, CDCl<sub>3</sub>) δ: 135.0, 134.7, 129.6, 127.3, 20.9, 16.5.

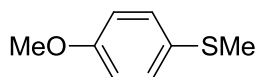

**(4-Methoxyphenyl)(methyl)sulfane (4i).**<sup>[1]</sup>

Yield 20% (15 mg); yellow oil; <sup>1</sup>H NMR (300 MHz, CDCl<sub>3</sub>) δ: 7.27 (d, *J* = 8.8 Hz, 2H), 6.85 (d, *J* = 8.8 Hz, 2H), 3.79 (s, 3H), 2.44 (s, 3H); <sup>13</sup>C NMR (75 MHz, CDCl<sub>3</sub>) δ: 158.2, 130.2, 128.7, 114.6, 55.3, 18.0.

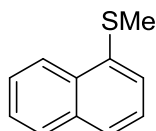

**Methyl(naphthalen-1-yl)sulfane (4j).**<sup>[1]</sup>

Yield 80% (70 mg); yellow oil; <sup>1</sup>H NMR (300 MHz, CDCl<sub>3</sub>) δ: 8.27 (d, *J* = 8.0 Hz, 1H), 7.78 (d, *J* = 7.6 Hz, 1H), 7.61 (d, *J* = 8.1 Hz, 1H), 7.52–7.42 (m, 2H), 7.38–7.30 (m, 2H), 2.48 (s, 3H); <sup>13</sup>C NMR (75 MHz, CDCl<sub>3</sub>) δ: 135.7, 133.5, 131.6, 128.4, 126.1, 126.0, 125.7, 125.6, 124.2, 123.5, 16.1; ESI-MS: *m/z* 175.85 [M+H]<sup>+</sup>.

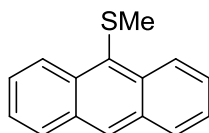

**Anthracen-9-yl(methyl)sulfane (4k).**<sup>[22]</sup>

Yield 92% (103 mg); yellow solid; <sup>1</sup>H NMR (300 MHz, CDCl<sub>3</sub>) δ: 8.92 (dd, *J*<sub>1</sub> = 8.8 Hz, *J*<sub>2</sub> = 0.7 Hz, 2H), 8.39 (s, 1H), 7.95 (d, *J* = 8.4 Hz, 2H), 7.59–7.53 (m, 2H), 7.47–7.42 (m, 2H), 2.35 (s, 3H); <sup>13</sup>C NMR (75 MHz, CDCl<sub>3</sub>) δ: 133.9, 131.8, 131.0, 129.0, 128.7, 126.8, 126.6, 125.3, 20.0.

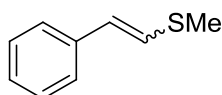

**Methyl(styryl)sulfane (4l).**<sup>[23]</sup>

Yield 95% (71 mg); yellow oil; *Z/E* = 1:5; *Trans*: <sup>1</sup>H NMR (300 MHz, CDCl<sub>3</sub>) δ: 7.26 (d, *J* = 4.3 Hz, 4H), 7.18–7.13 (m, 1H), 6.76 (d, *J* = 15.4 Hz, 1H), 6.27 (d, *J* = 15.4 Hz, 1H), 2.32 (s, 3H); *Cis*: <sup>1</sup>H NMR (300 MHz, CDCl<sub>3</sub>) δ: 7.46 (d, *J* = 8.0 Hz, 2H), 7.34 (d, *J* = 7.5 Hz, 3H), 6.40 (d, *J* = 10.8 Hz, 1H), 6.16 (d, *J* = 10.9 Hz, 1H), 2.33 (s, 3H); <sup>13</sup>C NMR (75 MHz, CDCl<sub>3</sub>) δ: 137.0, 136.8, 128.9, 128.5, 128.1, 126.5, 125.7, 125.2, 125.1, 124.5, 18.7, 14.6.

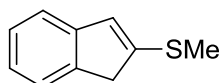

**(1H-Inden-2-yl)(methyl)sulfane (4m).**<sup>[24]</sup>



Yield 95% (77 mg); yellow solid;  $^1\text{H}$  NMR (300 MHz,  $\text{CDCl}_3$ )  $\delta$ : 7.28 (d,  $J = 6.7$  Hz, 1H), 7.27–7.16 (m, 2H), 7.07–6.99 (m, 1H), 6.36 (s, 1H), 3.43 (s, 2H), 2.39 (s, 3H);  $^{13}\text{C}$  NMR (75 MHz,  $\text{CDCl}_3$ )  $\delta$ : 145.2, 145.0, 142.0, 126.4, 123.2, 123.0, 122.8, 118.8, 41.6, 15.3.

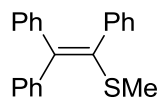

**Methyl(1,2,2-triphenylvinyl)sulfane (4n).**<sup>[25]</sup>

Yield 90% (136 mg); white solid;  $^1\text{H}$  NMR (300 MHz,  $\text{CDCl}_3$ )  $\delta$ : 7.39–7.15 (m, 10H), 7.00–6.90 (m, 5H), 1.86 (s, 3H);  $^{13}\text{C}$  NMR (75 MHz,  $\text{CDCl}_3$ )  $\delta$ : 143.5, 142.5, 140.9, 138.7, 137.0, 130.7, 130.4, 129.8, 128.2, 128.0, 127.5, 127.1, 126.9, 126.1, 16.1.

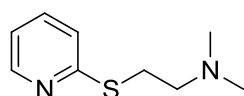

**N,N-dimethyl-2-(pyridin-2-ylthio)ethanamine (5a).**<sup>[26]</sup>

Yield 80% (73 mg); yellow oil;  $^1\text{H}$  NMR (300 MHz,  $\text{CDCl}_3$ )  $\delta$ : 7.93–7.85 (m, 2H), 7.71 (d,  $J = 8.0$  Hz, 1H), 7.66–7.61 (m, 1H), 7.44–7.39 (m, 1H), 7.21 (d,  $J = 8.6$  Hz, 1H), 3.49 (t,  $J = 7.1$  Hz, 2H), 2.71 (t,  $J = 7.5$  Hz, 2H), 2.37 (s, 6H);  $^{13}\text{C}$  NMR (75 MHz,  $\text{CDCl}_3$ )  $\delta$ : 158.9, 148.3, 135.2, 129.5, 128.0, 127.6, 126.0, 125.2, 121.1, 58.7, 45.3, 27.2; ESI-MS:  $m/z$  183.07  $[\text{M}+\text{H}]^+$ .

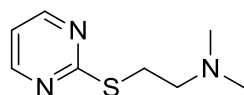

**N,N-dimethyl-2-(pyrimidin-2-ylthio)ethanamine (5b).**<sup>[27]</sup>

Yield 90% (82 mg); yellow solid;  $^1\text{H}$  NMR (300 MHz,  $\text{CDCl}_3$ )  $\delta$ : 8.51 (d,  $J = 4.8$  Hz, 2H), 6.96 (t,  $J = 4.8$  Hz, 1H), 3.28 (t,  $J = 7.1$  Hz, 2H), 2.67 (t,  $J = 7.5$  Hz, 2H), 2.32 (s, 6H);  $^{13}\text{C}$  NMR (75 MHz,  $\text{CDCl}_3$ )  $\delta$ : 172.3, 157.1, 116.3, 58.4, 45.1, 28.4; ESI-MS:  $m/z$  184.08  $[\text{M}+\text{H}]^+$ .

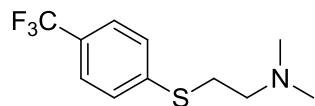

**N,N-Dimethyl-2-((4-(trifluoromethyl)phenyl)thio)ethanamine (5c, new compound)**

Yield 88% (110 mg); yellow oil; IR (KBr)  $\nu$  3440, 2923, 1733, 1631, 1594, 1400, 1275, 1175, 1025, 747  $\text{cm}^{-1}$ ;  $^1\text{H}$  NMR (300 MHz,  $\text{CDCl}_3$ )  $\delta$ : 7.51 (d,  $J = 7.8$  Hz, 2H), 7.37 (d,  $J = 7.5$  Hz, 2H), 3.10 (t,  $J = 6.9$  Hz, 2H), 2.60 (t,  $J = 7.2$  Hz, 2H), 2.29 (s, 6H);  $^{13}\text{C}$  NMR (75 MHz,  $\text{CDCl}_3$ )  $\delta$ : 142.3, 127.2, 125.6 (q,  $^3J_{\text{C-F}} = 3.6$  Hz), 124.1 (q,  $^1J_{\text{C-F}} = 270.0$  Hz), 58.1, 45.3, 30.5; HRMS (ESI):  $m/z$  calcd for  $\text{C}_{11}\text{H}_{14}\text{F}_3\text{NS}$ : 250.0872, found: 250.0874  $[\text{M}+\text{H}]^+$ .

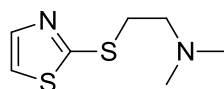

**N,N-dimethyl-2-(thiazol-2-ylthio)ethanamine (5d, new compound)**

Yield 85% (80 mg); yellow oil; IR (KBr)  $\nu$  3433, 3193, 2924, 2852, 1631, 1597, 1399, 1036, 750, 488  $\text{cm}^{-1}$ ;  $^1\text{H}$  NMR (300 MHz,  $\text{CDCl}_3$ )  $\delta$ : 7.65 (d,  $J = 3.3$  Hz, 1H), 7.20 (d,  $J = 3.4$  Hz, 1H), 3.36 (t,  $J = 6.9$  Hz, 2H), 2.68 (t,  $J = 7.3$  Hz, 2H), 2.29 (s, 6H);  $^{13}\text{C}$  NMR (75 MHz,  $\text{CDCl}_3$ )  $\delta$ : 164.9, 142.5, 118.6, 58.1, 45.1, 32.2; HRMS (ESI):  $m/z$  calcd for  $\text{C}_7\text{H}_{12}\text{N}_2\text{S}_2$ : 189.0515, found: 189.0521  $[\text{M}+\text{H}]^+$ .

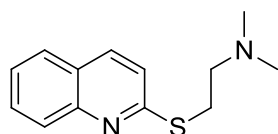

**N,N-Dimethyl-2-(quinolin-2-ylthio)ethanamine (5e, new compound)**

Yield 92% (107 mg); yellow oil; IR (KBr)  $\nu$  3434, 3086, 2923, 1720, 1677, 1597, 1474, 1398, 1278, 749  $\text{cm}^{-1}$ ;  $^1\text{H}$  NMR (300 MHz,  $\text{CDCl}_3$ )  $\delta$ : 7.93–7.85 (m, 2H), 7.71 (d,  $J = 8.0$  Hz, 1H), 7.66–7.61 (m, 1H), 7.44–7.39 (m, 1H), 7.21 (d,  $J = 8.6$  Hz, 1H), 3.49 (t,  $J = 7.1$  Hz, 2H), 2.71 (t,  $J = 7.5$  Hz, 2H), 2.37 (s, 6H);  $^{13}\text{C}$  NMR (75 MHz,  $\text{CDCl}_3$ )  $\delta$ : 158.9, 148.3, 135.2, 129.5, 128.0, 127.6, 126.0, 125.2, 121.1, 58.7, 45.3, 27.2; HRMS (ESI):  $m/z$  calcd for  $\text{C}_{13}\text{H}_{16}\text{N}_2\text{S}$ : 233.1107, found: 233.1111  $[\text{M}+\text{H}]^+$ .

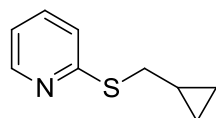

**2-((Cyclopropylmethyl)thio)pyridine (5f, new compound)**

Yield 81% (67 mg); yellow oil; IR (KBr)  $\nu$  3423, 2975, 2924, 1632, 1413, 1048, 756, 723, 490, 424  $\text{cm}^{-1}$ ;  $^1\text{H}$  NMR (300 MHz,  $\text{CDCl}_3$ )  $\delta$ : 8.41 (dd,  $J_1 = 4.9$  Hz,  $J_2 = 0.8$  Hz, 1H), 7.49–7.43 (m, 1H), 7.19 (d,  $J = 8.1$  Hz, 1H), 6.98–6.94 (m, 1H), 3.13 (d,  $J = 7.1$  Hz, 2H), 1.19–1.10 (m, 1H), 0.60–0.57 (m, 2H), 0.33–0.31 (m, 2H);  $^{13}\text{C}$  NMR (75 MHz,  $\text{CDCl}_3$ )  $\delta$ : 159.6, 149.3, 135.8, 122.2, 119.2, 35.8, 10.6, 5.7. HRMS (ESI):  $m/z$  calcd for  $\text{C}_9\text{H}_{11}\text{NS}$ : 166.0685, found: 166.0687  $[\text{M}+\text{H}]^+$ .

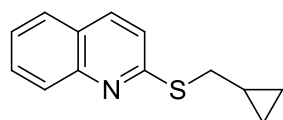

**2-((Cyclopropylmethyl)thio)quinoline (5g, new compound)**

Yield 95% (102 mg); yellow oil; IR (KBr)  $\nu$  3442, 3077, 2922, 1631, 1593, 1418, 1088, 814, 747, 601  $\text{cm}^{-1}$ ;  $^1\text{H}$  NMR (300 MHz,  $\text{CDCl}_3$ )  $\delta$ : 7.92 (d,  $J = 8.4$  Hz, 1H), 7.83 (d,  $J = 8.6$  Hz, 1H), 7.69–7.59 (m, 2H), 7.42–7.36 (m, 1H), 7.20 (d,  $J = 8.6$  Hz, 1H), 3.30 (d,  $J = 7.2$  Hz, 2H), 1.29–1.19 (m, 1H), 0.63–0.57 (m, 2H), 0.40–0.35 (m, 2H);  $^{13}\text{C}$  NMR (75 MHz,  $\text{CDCl}_3$ )  $\delta$ : 159.6, 148.2, 135.1, 129.5, 127.5, 125.8, 125.0, 120.9, 35.4, 10.7, 5.7; ESI-MS:  $m/z$  215.92  $[\text{M}+\text{H}]^+$ .

## References

- [1] P. J. Joseph, S. Priyadarshini, M. L. Kantam and B. Sreedhar, *Tetrahedron*, **2013**, 69, 8276–8283.
- [2] N. A. Nedolya, N. I. Schlyakhtina, L. V. Klyba, I. A. Ushakov, S. V. Fedorova and Lambert Brandsma, *Tetrahedron Lett.*, **2002**, 43, 9679–9681.
- [3] T. Kaminski, P. Gros and Y. Fort, *Eur. J. Org. Chem.*, 2003, 2003, 3855–3860.
- [4] J. Mathieu, P. Gros and Y. Fort, *Chem. Commun.*, **2000**, 951–952.
- [5] P. Gros, Y. Fort and P. Caubère, *J. Chem. Soc., Perkin Trans. 1*, 1997, 3071–3080.
- [6] J. S. Dhau, A. Singh, Y. Kasetti, S. Bhatia, P. V. Bharatam, P. Brandão, V. Félix and K. N. Singh, *Tetrahedron*, **2013**, 69, 10284–10291.
- [7] L. Testaferri, M. Tiecco, M. Tingoli, D. Bartoli and A. Massoli, *Tetrahedron*, **1985**, 7, 1373–1384.
- [8] H. S. Forrest and J. Walker, *J. Chem. Soc.*, **1948**, 0, 1939–1945.
- [9] A. Metzger, L. Melzig, C. Despotopoulou and P. Knochel, *Org. Lett.*, **2009**, 11, 4228–4231.
- [10] M. Jeanty, J. Blu, F. Suzenet and G. Guillaumet, *Org. Lett.*, **2009**, 11, 5142–5145.
- [11] K. Ghosh, S. Ranjit and D. Mal, *Tetrahedron Lett.*, **2015**, 56, 5199–5202.
- [12] T. N. Glasnov, J. D. Holbrey, C. O. Kappe, K. R. Seddon and T. Yan, *Green Chem.*, **2012**, 14, 3071–3076.
- [13] L. F. Frey, K. M. Marcantonio, C. Chen, D. J. Wallace, J. A. Murry, L. Tan, W. Chen, U. H. Dolling and E. J. J. Grabowski, *Tetrahedron*, **2003**, 59, 6363–6373.
- [14] J. Xie, C. Wu, B. W. Christopher, J. Quan and L. Zhu, *Phosphorus, Sulfur, and Silicon, Relat. Elem.*, **2010**, 186, 31–37.
- [15] D. L. Boger and S. M. Sakya, *J. Org. Chem.*, **1988**, 53, 1415–1423.
- [16] J. J. Li, W. Meng, S. Wu, Y. J. Wu, J. Guernon, M. P. Allen, M. M. Miller, P. T. Cheng and B. Chen, *Tetrahedron Lett.*, **2013**, 54, 1938–1942.
- [17] V. Alcolea, D. Plano, I. Encó, J. A. Palop, A. K. Sharma and C. Sanmartín, *Eur. J. Med. Chem.*, **2016**, 123, 407–418.
- [18] J. A. Zoltewicz and T. M. Oestreich, *J. Org. Chem.*, **1991**, 56, 2805–2809.
- [19] T. Zweifel, J. V. Naubron and H. Grützmacher, *Angew. Chem. Int. Ed.*, **2009**, 48, 559–563.
- [20] J. M. Baskin and Z. Wang, *Org. Lett.*, **2002**, 4, 4423–4425.
- [21] A. Perrier, M. Keller, A. M. Caminade, J. P. Majoral and Armelle Ouali, *Green Chem.*, **2013**, 15, 2075–2080.
- [22] F. D. Saeva and D. T. Breslin, *J. Org. Chem.*, **1989**, 54, 712–714.
- [23] A. Beauchemin and Y. Gareau, *Phosphorus, Sulfur, and Silicon, Relat. Elem.*, **1998**, 139, 187–192.
- [24] K. Hartke and A. Schilling-Pindur, *Liebigs Ann. Chem.*, **1984**, 1984, 552–563.
- [25] V. N. Drozd and O. A. Popova, *J. Org. Chem. USSR*, **1983**, 19, 946–949.
- [26] G. B. Barlin and S. J. Ireland, *Aust. J. Chem.*, **1985**, 38, 1685–1691.
- [27] L. Strekowski, A. Strekowska, R. A. Watson, F. A. Tanious, L. T. Nguyen and W. D. Wilson, *J. Med. Chem.*, **1987**, 30, 1415–1420.

## 2. $^1\text{H}$ and $^{13}\text{C}$ NMR spectra of compounds 3~5

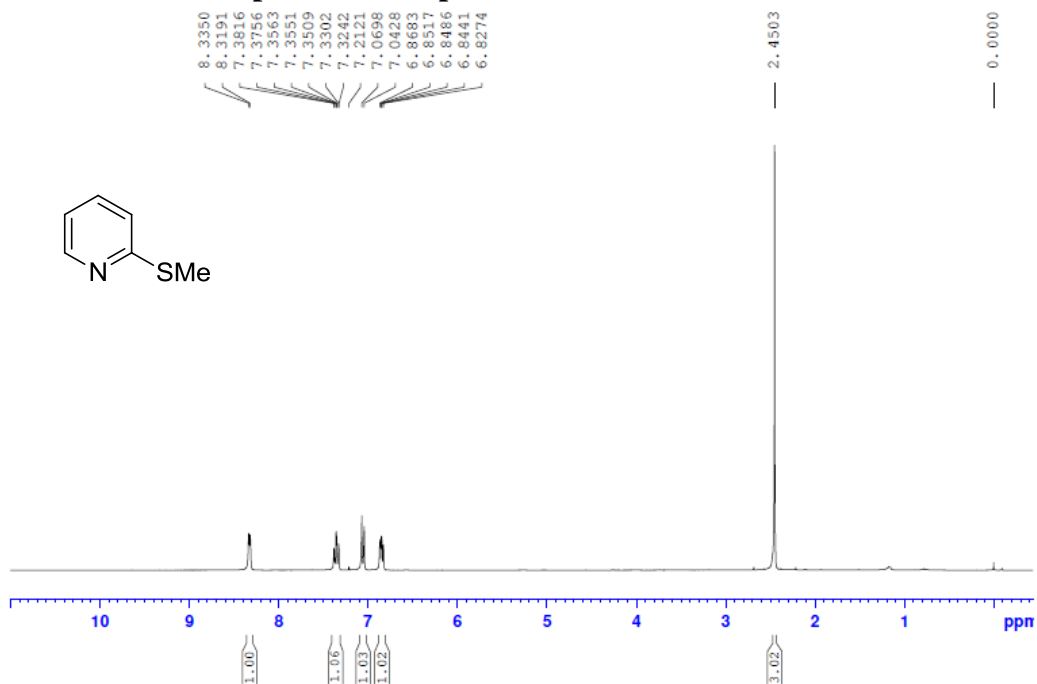

Figure 1  $^1\text{H}$  NMR spectrum of compound 3a (300 MHz,  $\text{CDCl}_3$ )

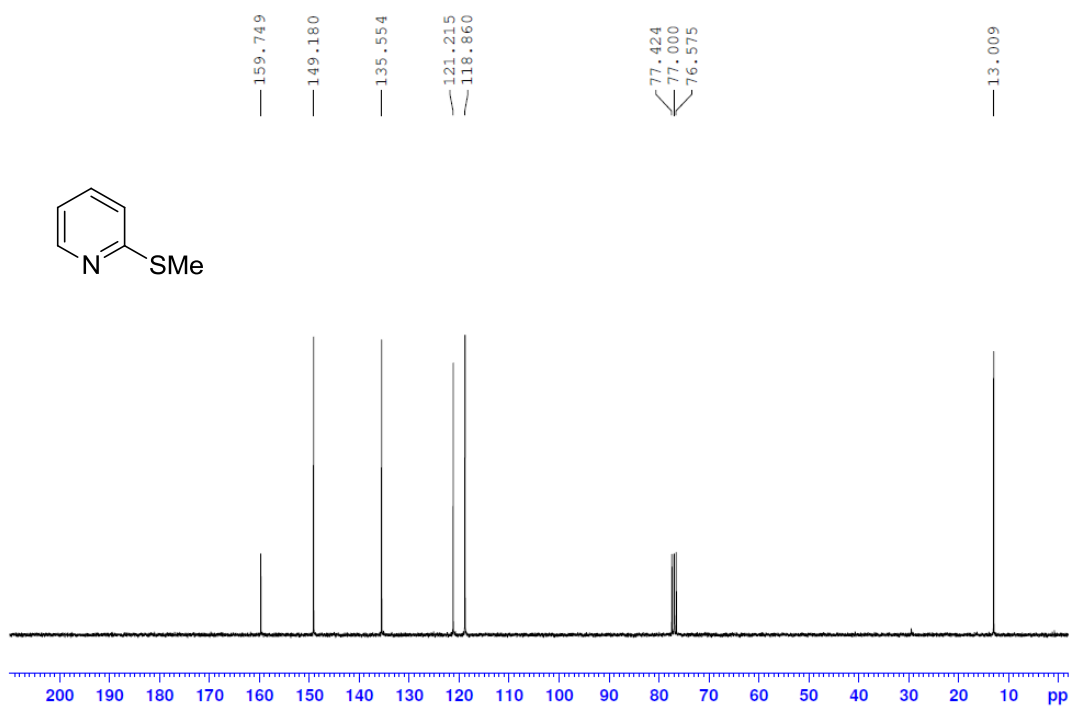

Figure 2  $^{13}\text{C}$  NMR spectrum of compound 3a (75 MHz,  $\text{CDCl}_3$ )

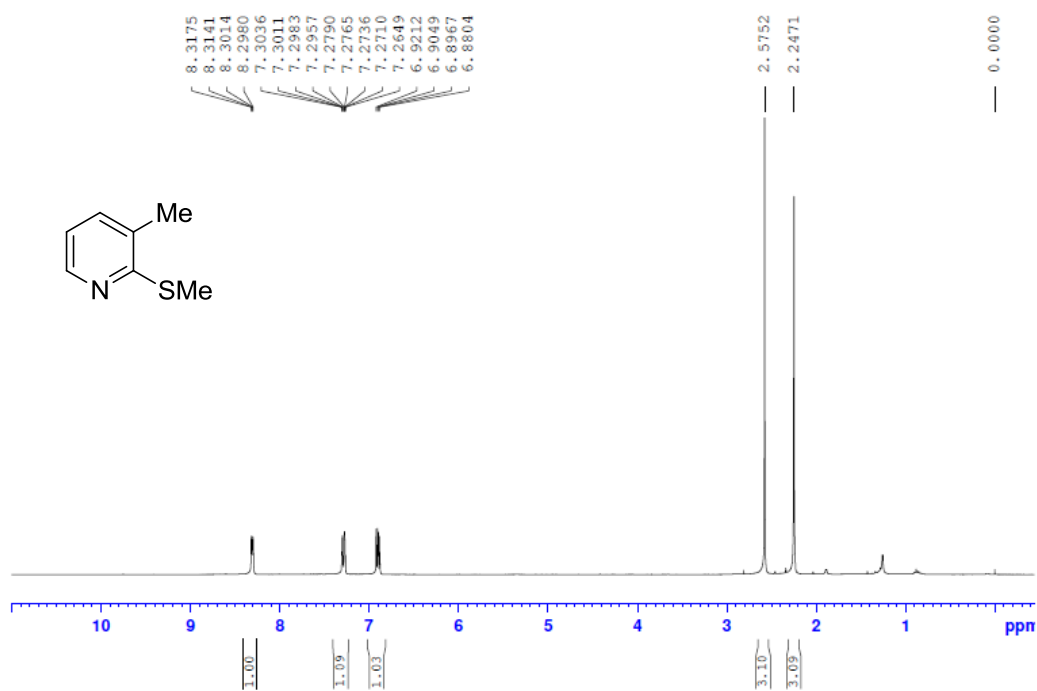

**Figure 3** <sup>1</sup>H NMR spectrum of compound **3b** (300 MHz, CDCl<sub>3</sub>)

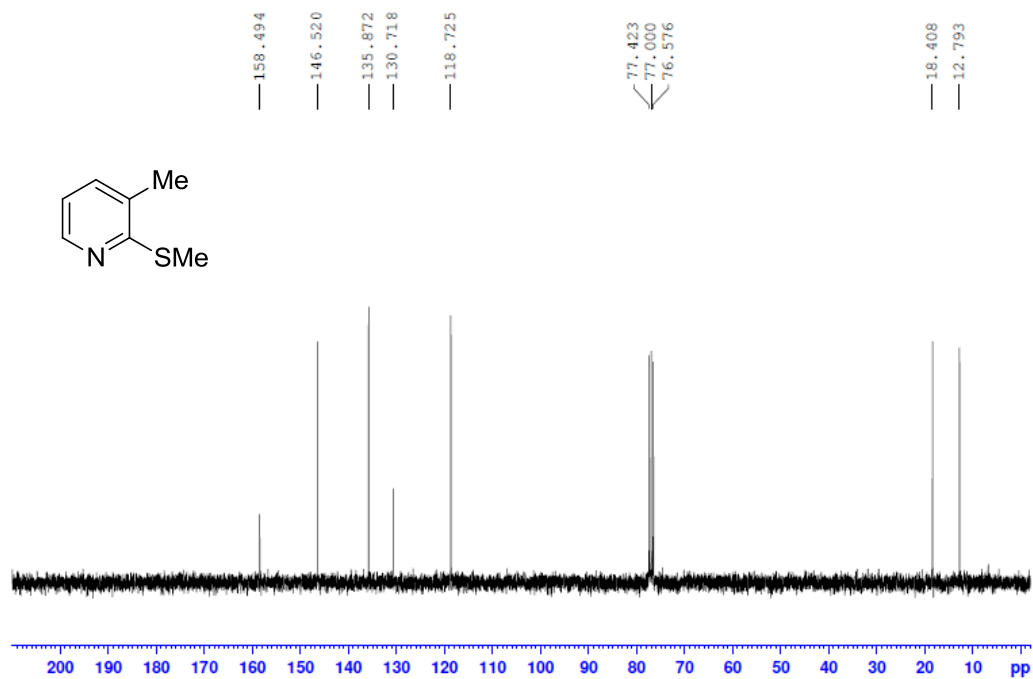

**Figure 4** <sup>13</sup>C NMR spectrum of compound **3b** (75 MHz, CDCl<sub>3</sub>)

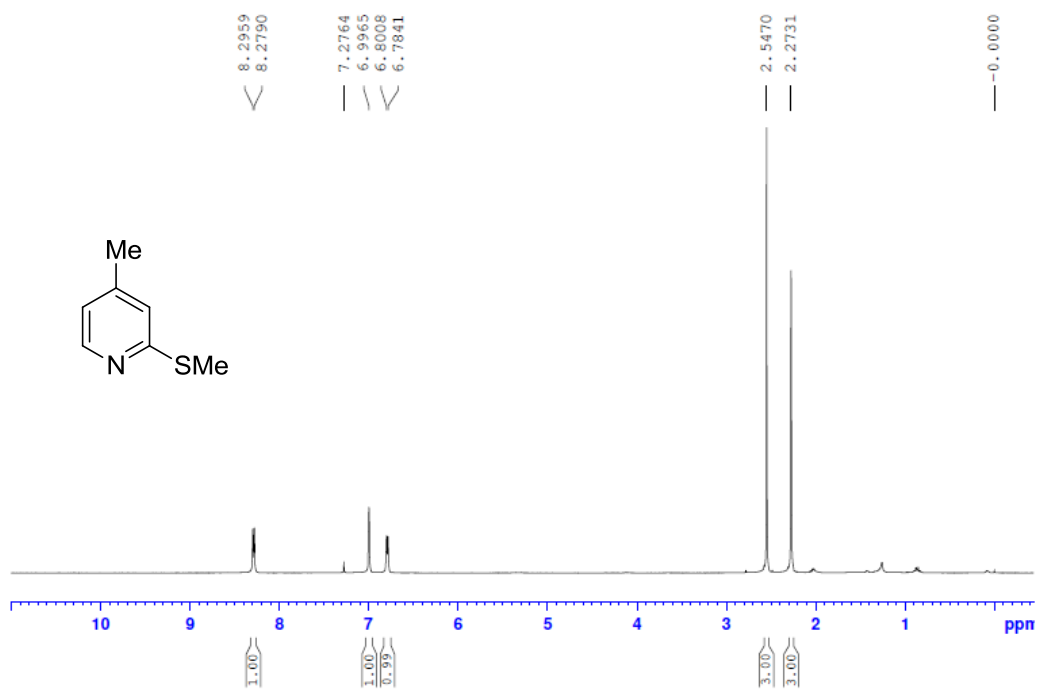

**Figure 5**  $^1\text{H}$  NMR spectrum of compound **3c** (300 MHz,  $\text{CDCl}_3$ )

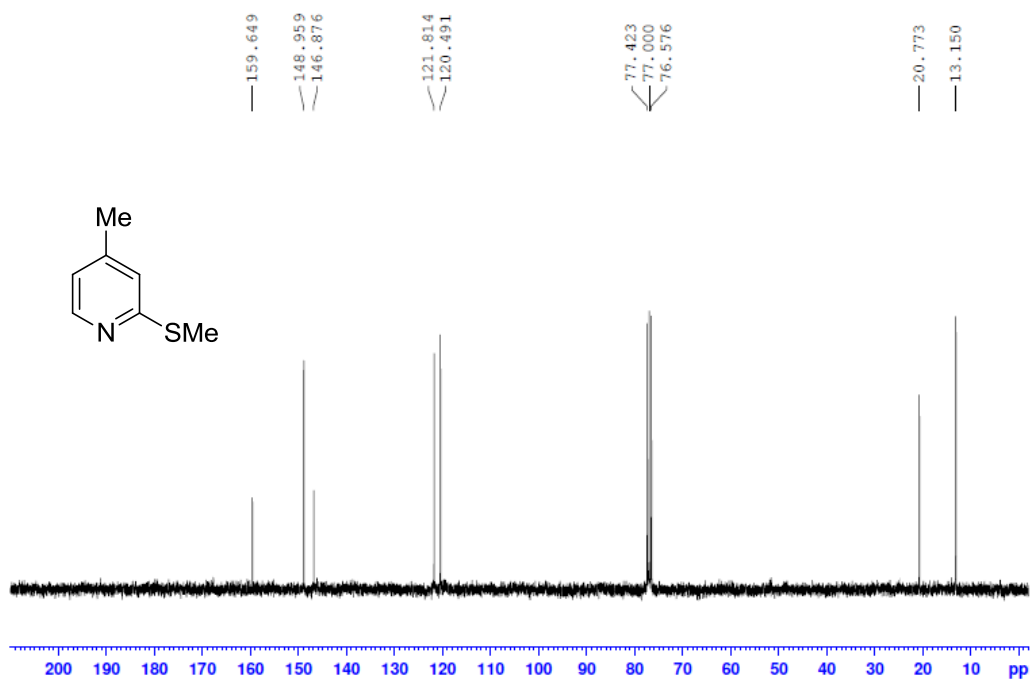

**Figure 6**  $^{13}\text{C}$  NMR spectrum of compound **3c** (75 MHz,  $\text{CDCl}_3$ )

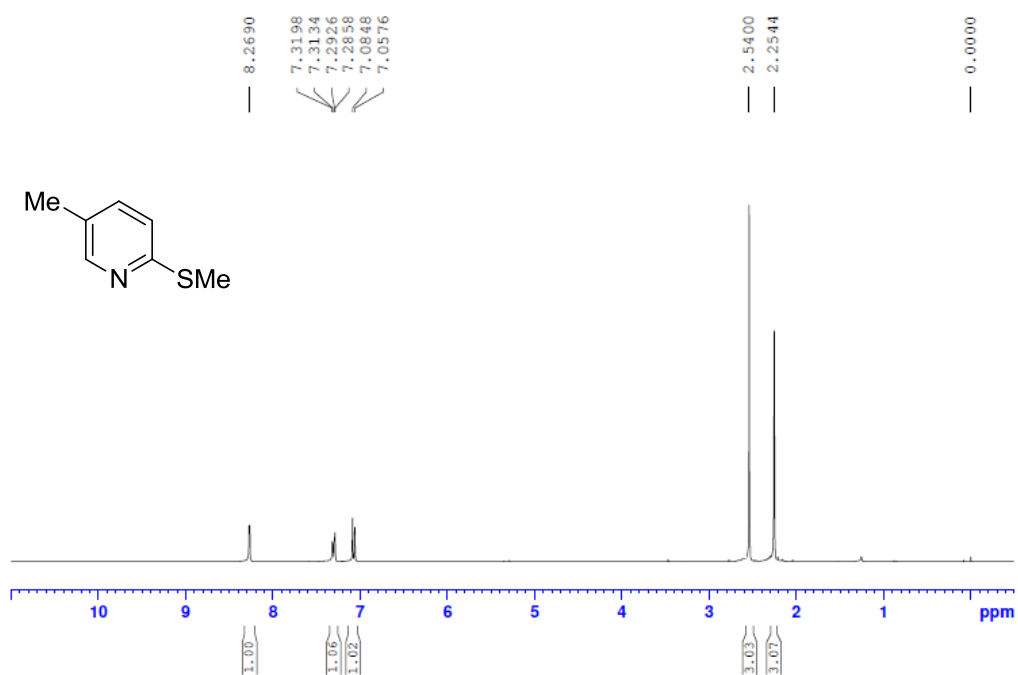

**Figure 7**  $^1\text{H}$  NMR spectrum of compound **3d** (300 MHz,  $\text{CDCl}_3$ )

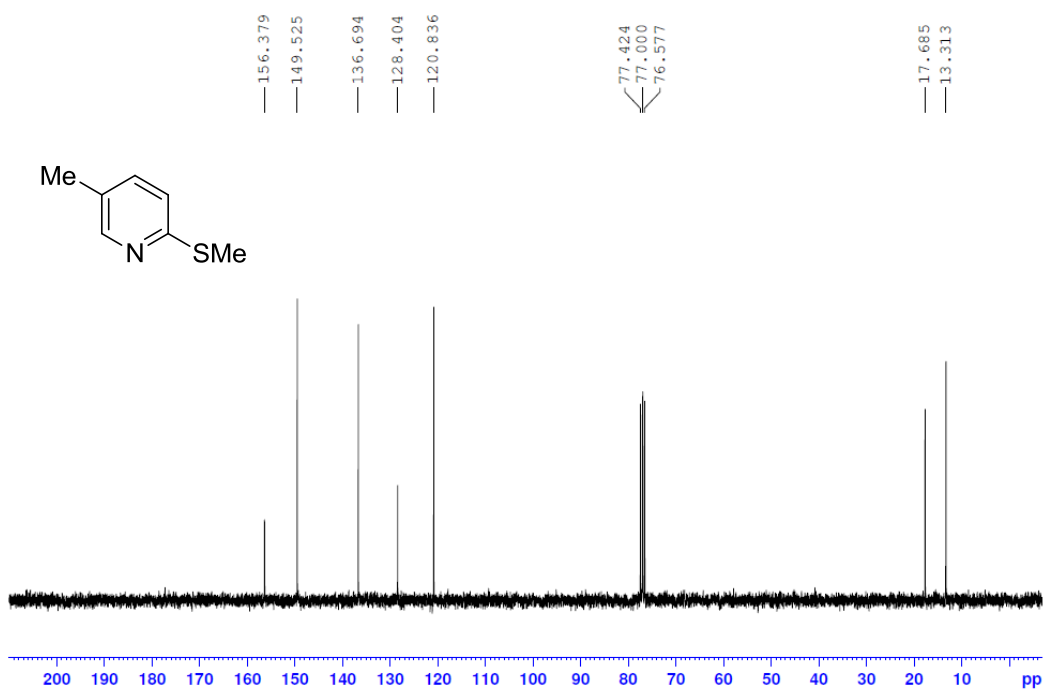

**Figure 8**  $^{13}\text{C}$  NMR spectrum of compound **3d** (75 MHz,  $\text{CDCl}_3$ )

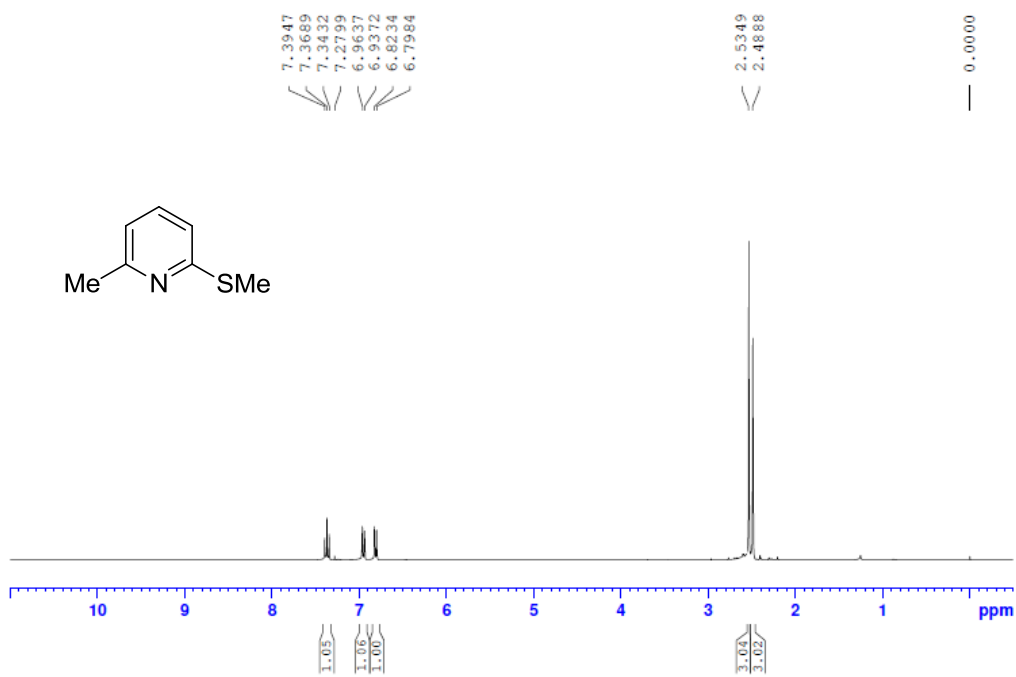

**Figure 9** <sup>1</sup>H NMR spectrum of compound **3e** (300 MHz, CDCl<sub>3</sub>)

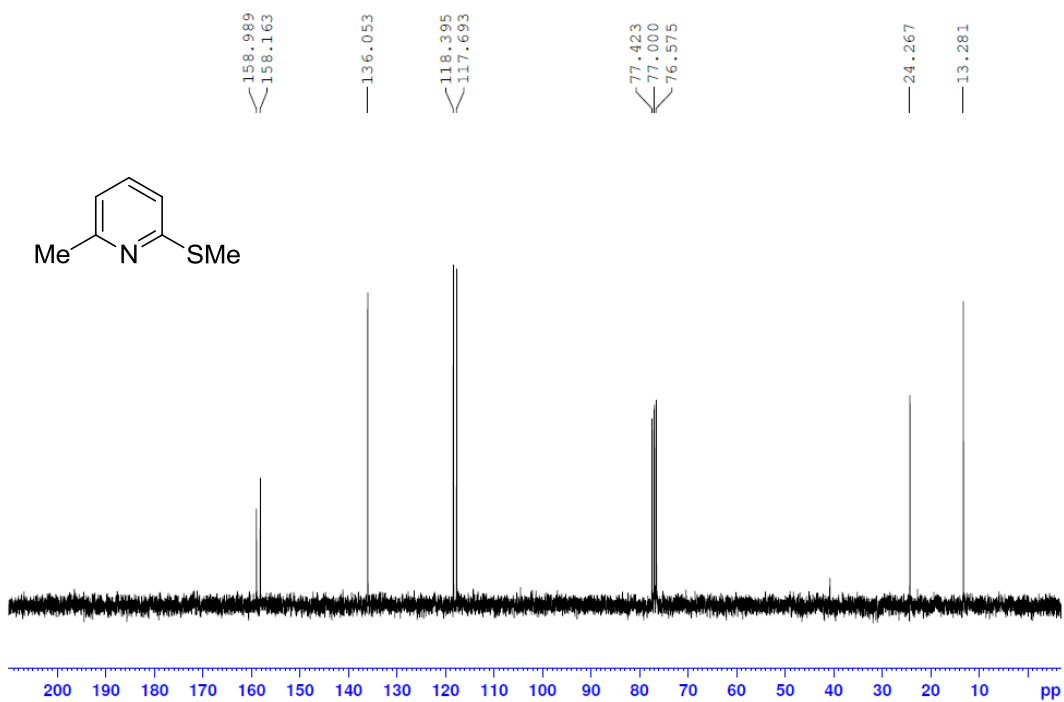

**Figure 10** <sup>13</sup>C NMR spectrum of compound **3e** (75 MHz, CDCl<sub>3</sub>)



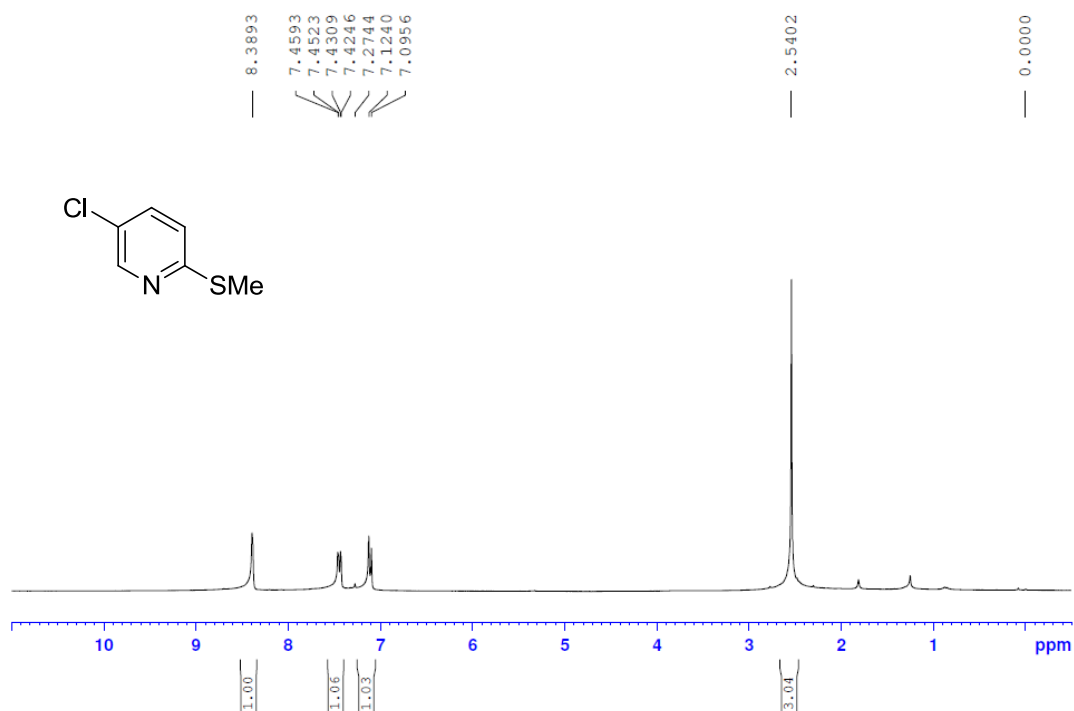

**Figure 11**  $^1\text{H}$  NMR spectrum of compound **3f** (300 MHz,  $\text{CDCl}_3$ )

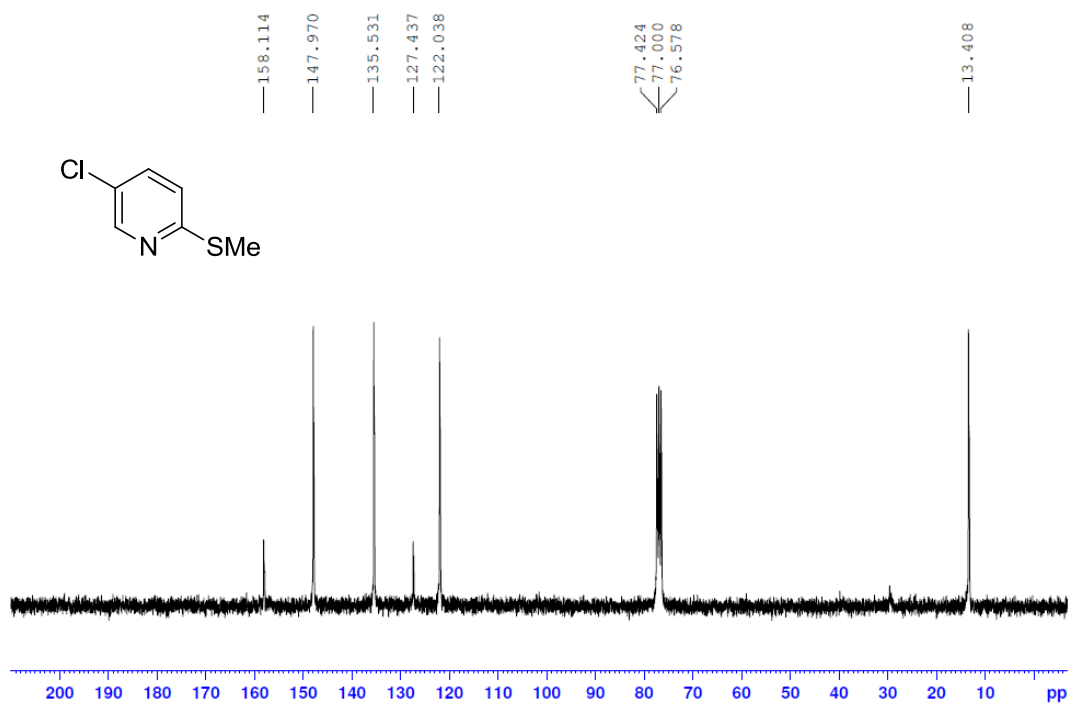

**Figure 12**  $^{13}\text{C}$  NMR spectrum of compound **3f** (75 MHz,  $\text{CDCl}_3$ )

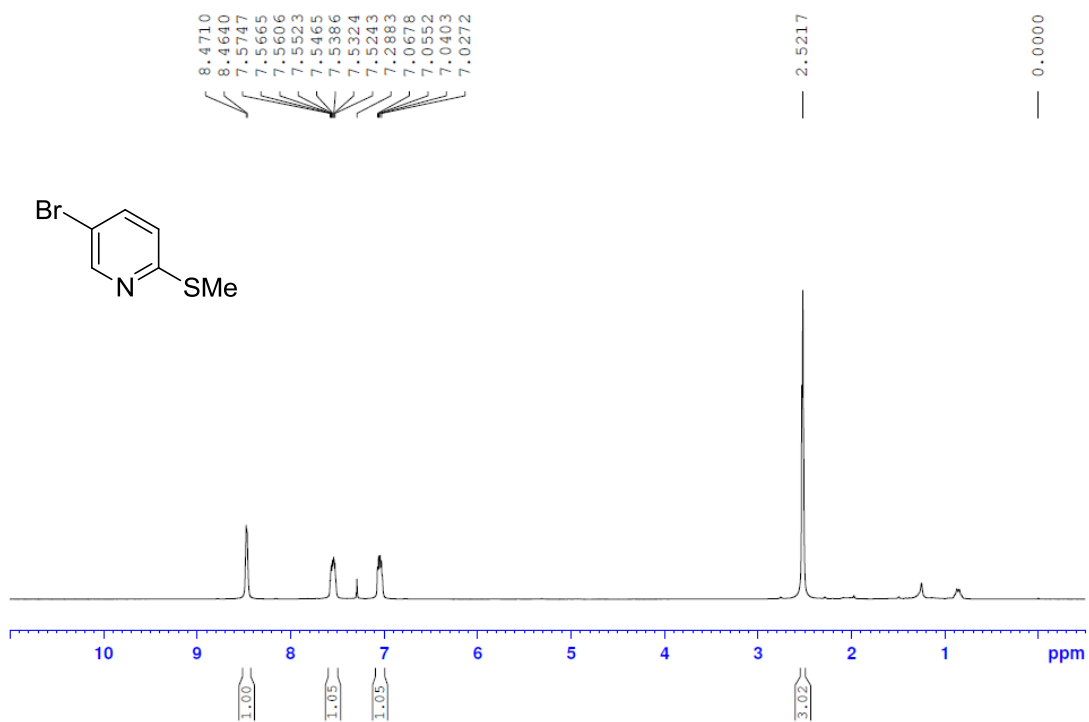

**Figure 13** <sup>1</sup>H NMR spectrum of compound **3g** (300 MHz, CDCl<sub>3</sub>)

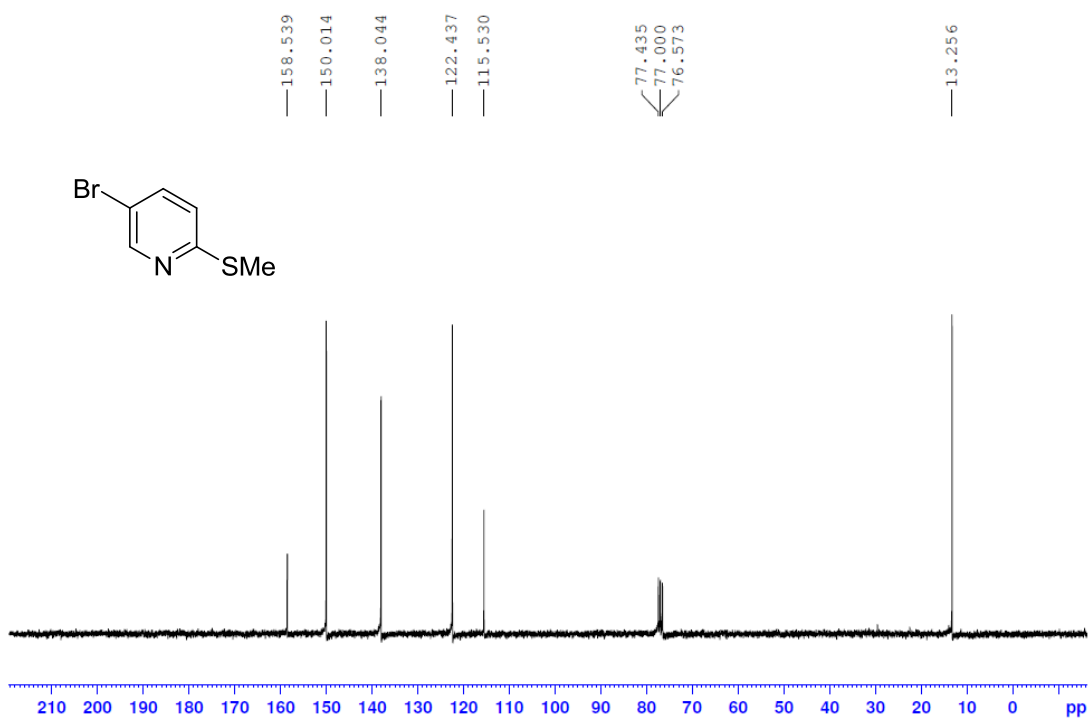

**Figure 14** <sup>13</sup>C NMR spectrum of compound **3g** (75 MHz, CDCl<sub>3</sub>)

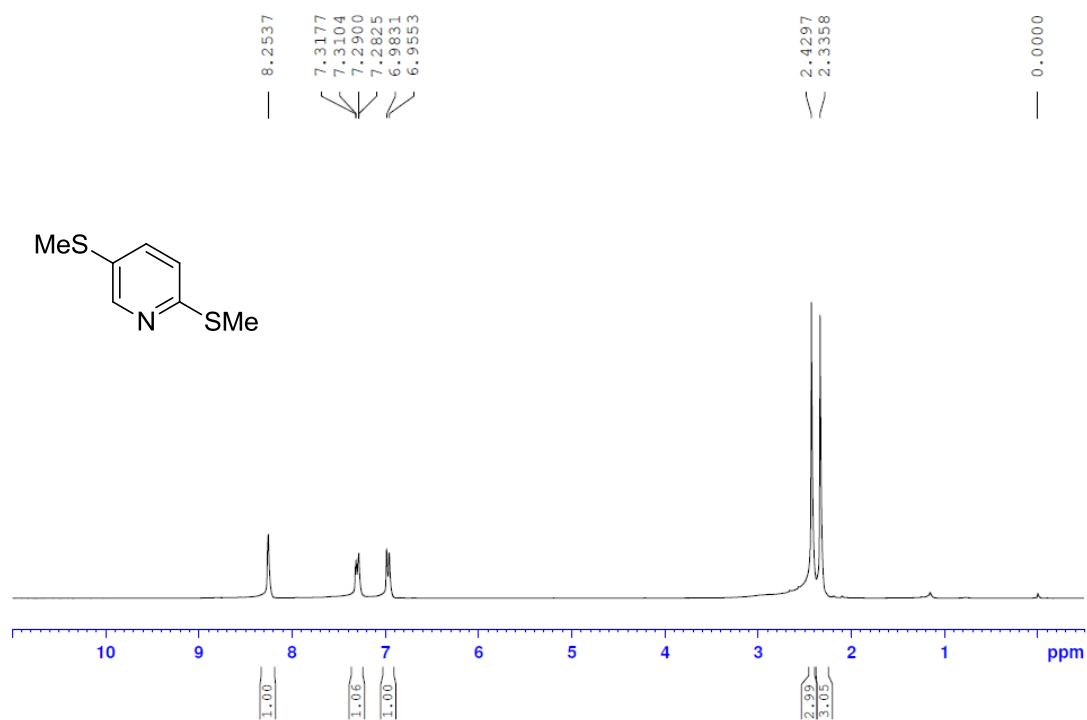

**Figure 15** <sup>1</sup>H NMR spectrum of compound **3h** (300 MHz, CDCl<sub>3</sub>)

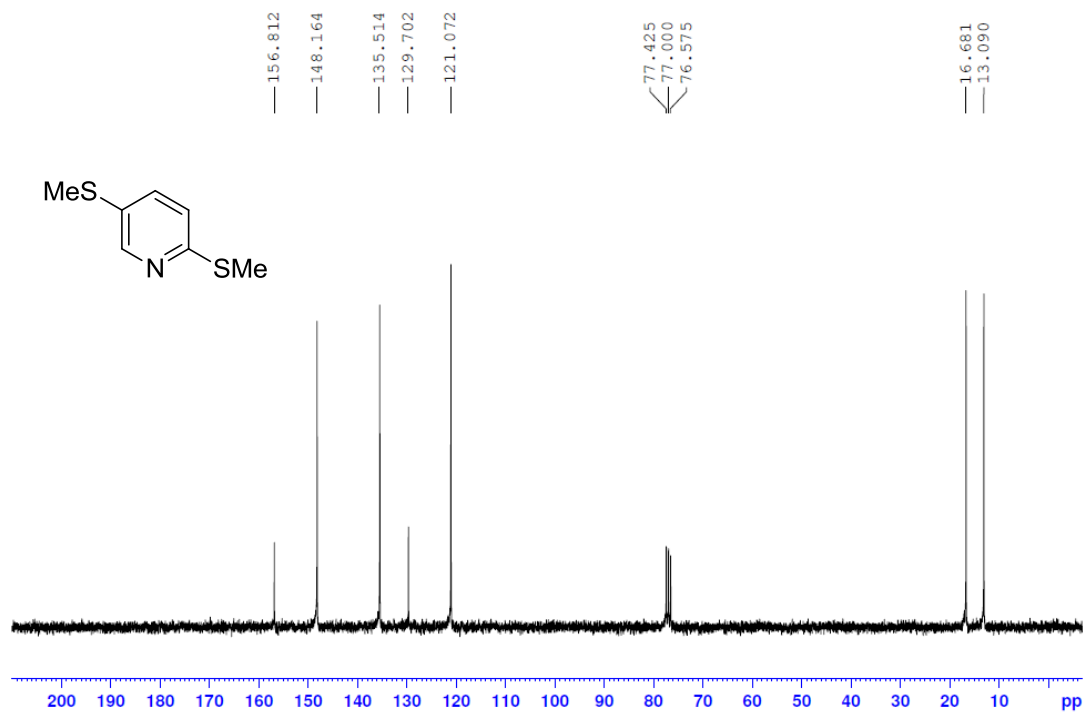

**Figure 16** <sup>13</sup>C NMR spectrum of compound **3h** (75 MHz, CDCl<sub>3</sub>)

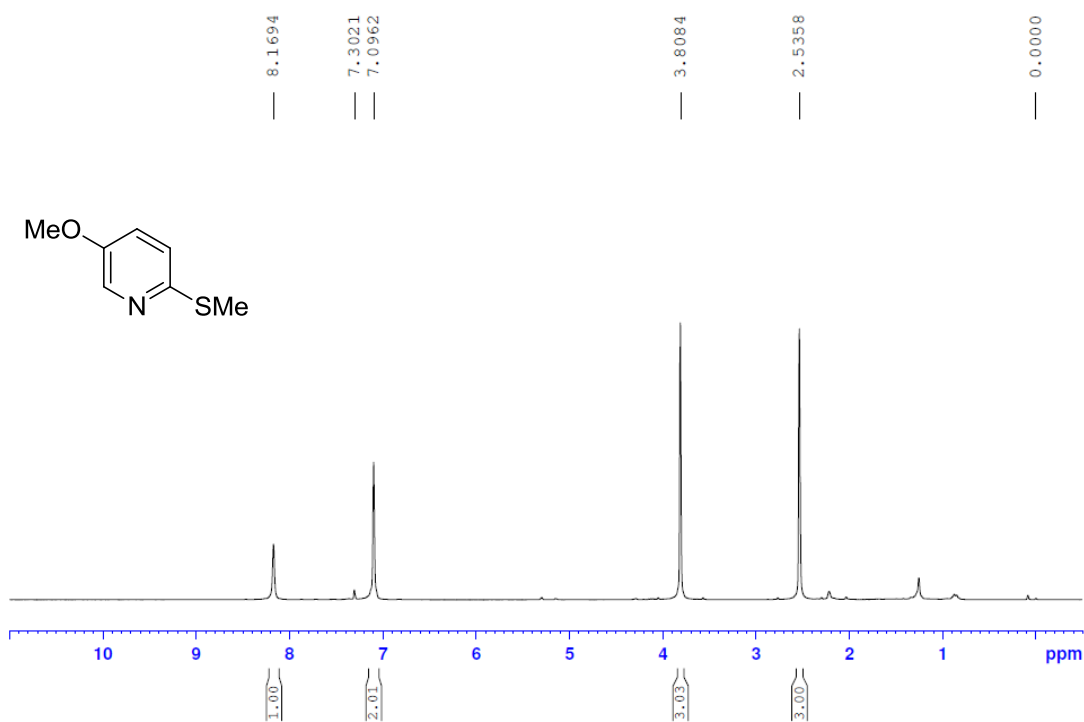

**Figure 17**  $^1\text{H}$  NMR spectrum of compound **3i** (300 MHz,  $\text{CDCl}_3$ )

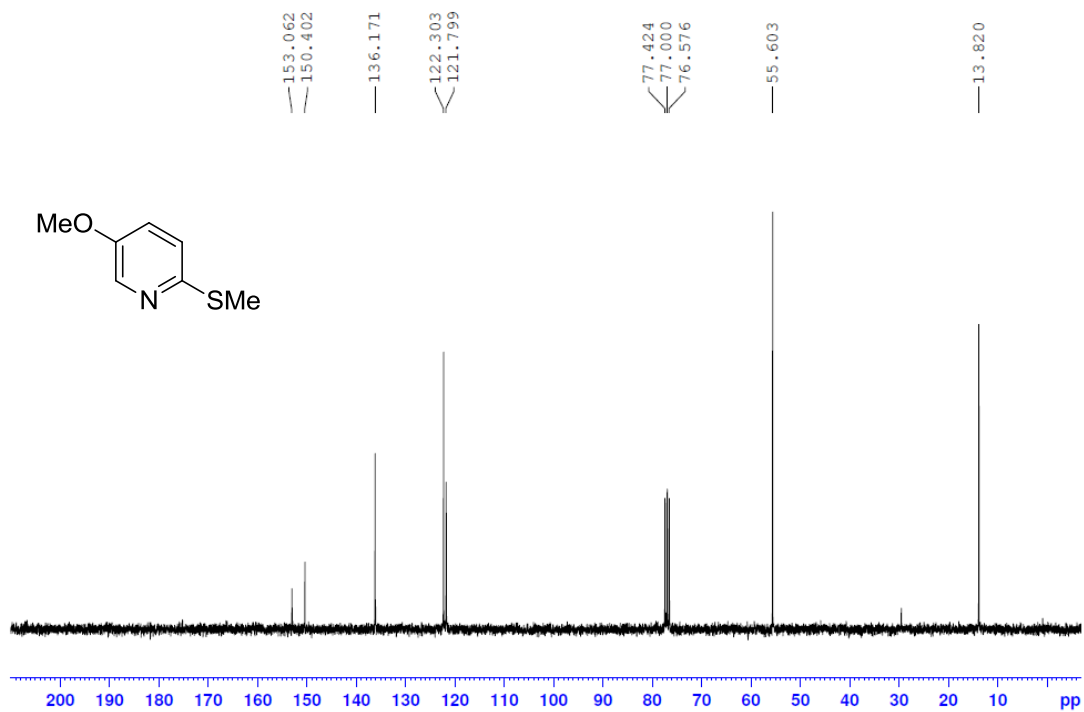

**Figure 18**  $^{13}\text{C}$  NMR spectrum of compound **3i** (75 MHz,  $\text{CDCl}_3$ )

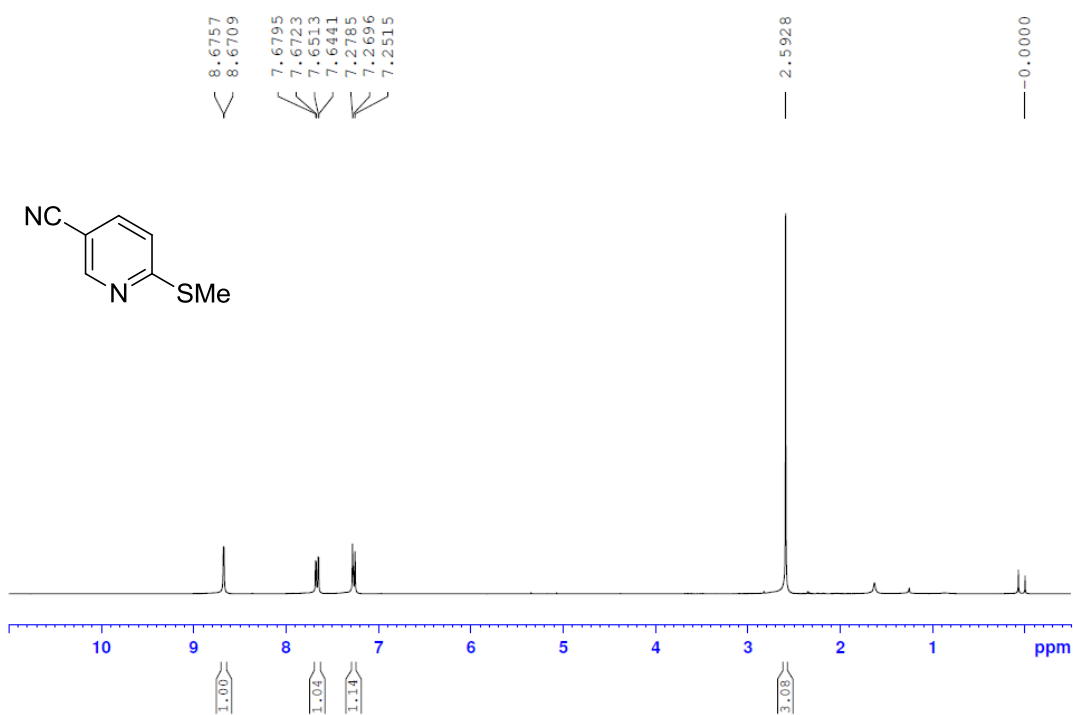

**Figure 19** <sup>1</sup>H NMR spectrum of compound **3j** (300 MHz, CDCl<sub>3</sub>)

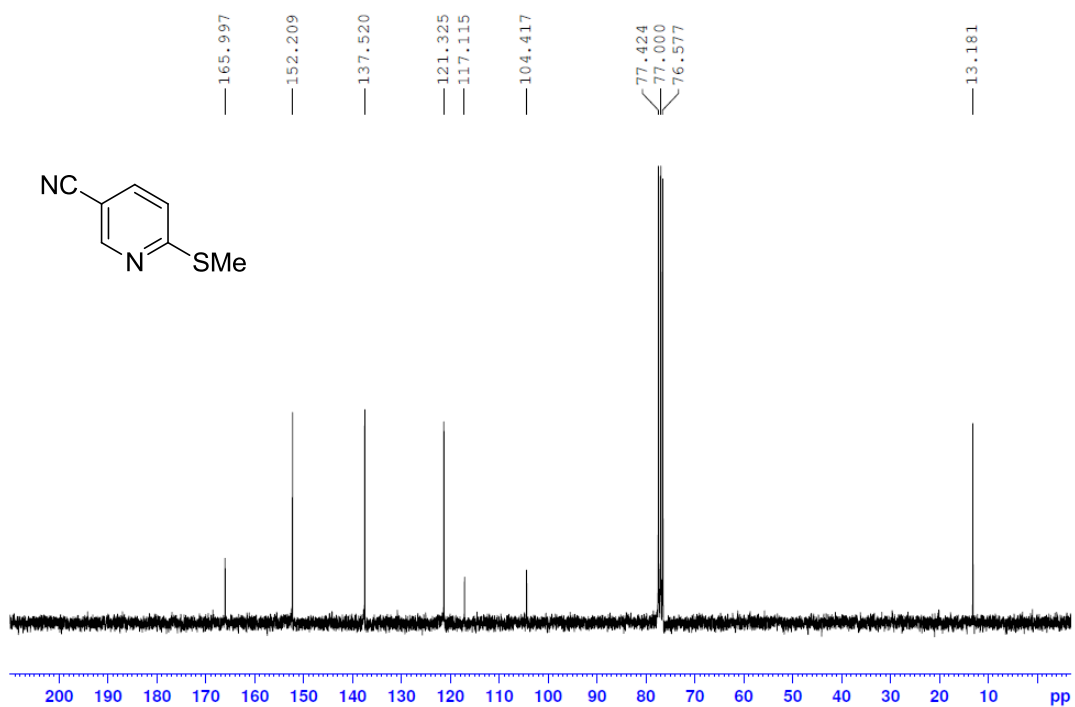

**Figure 20** <sup>13</sup>C NMR spectrum of compound **3j** (75 MHz, CDCl<sub>3</sub>)

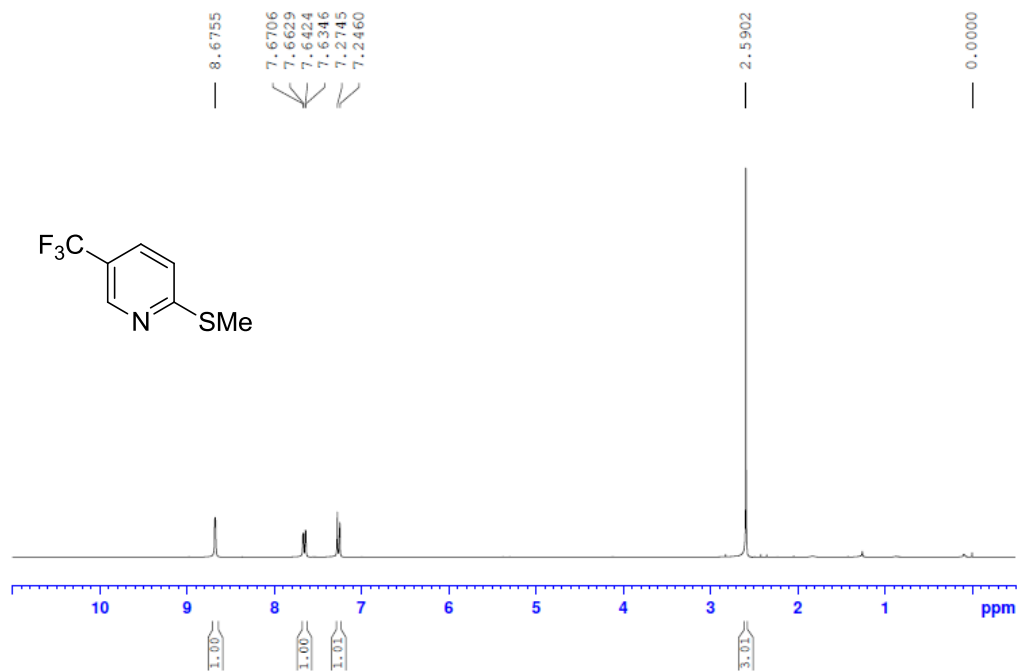

**Figure 21** <sup>1</sup>H NMR spectrum of compound **3k** (300 MHz, CDCl<sub>3</sub>)

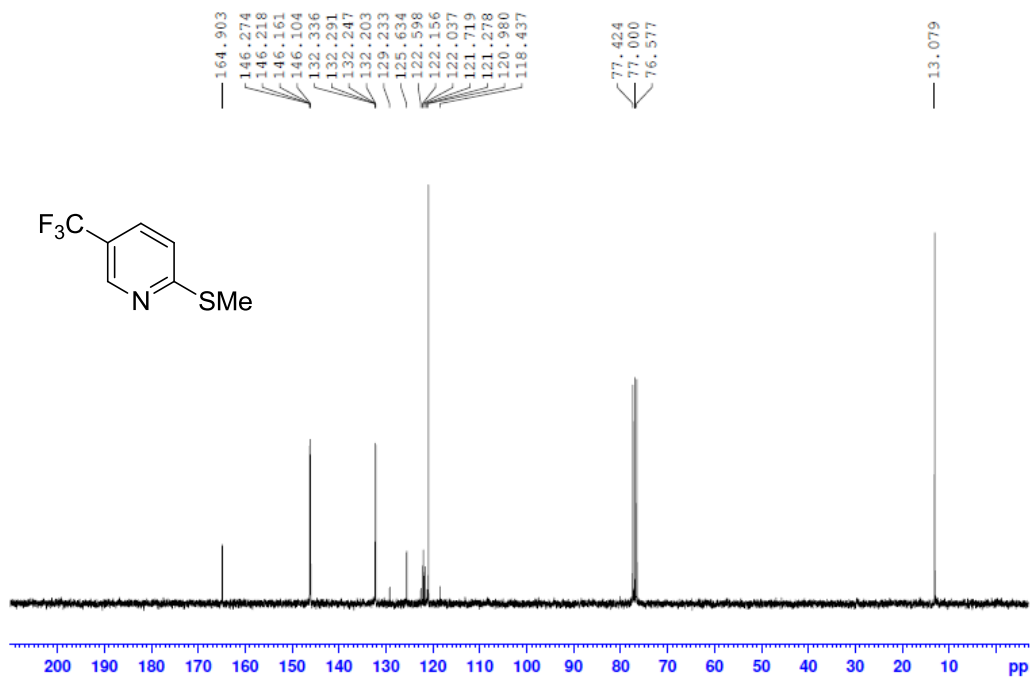

**Figure 22** <sup>13</sup>C NMR spectrum of compound **3k** (75 MHz, CDCl<sub>3</sub>)

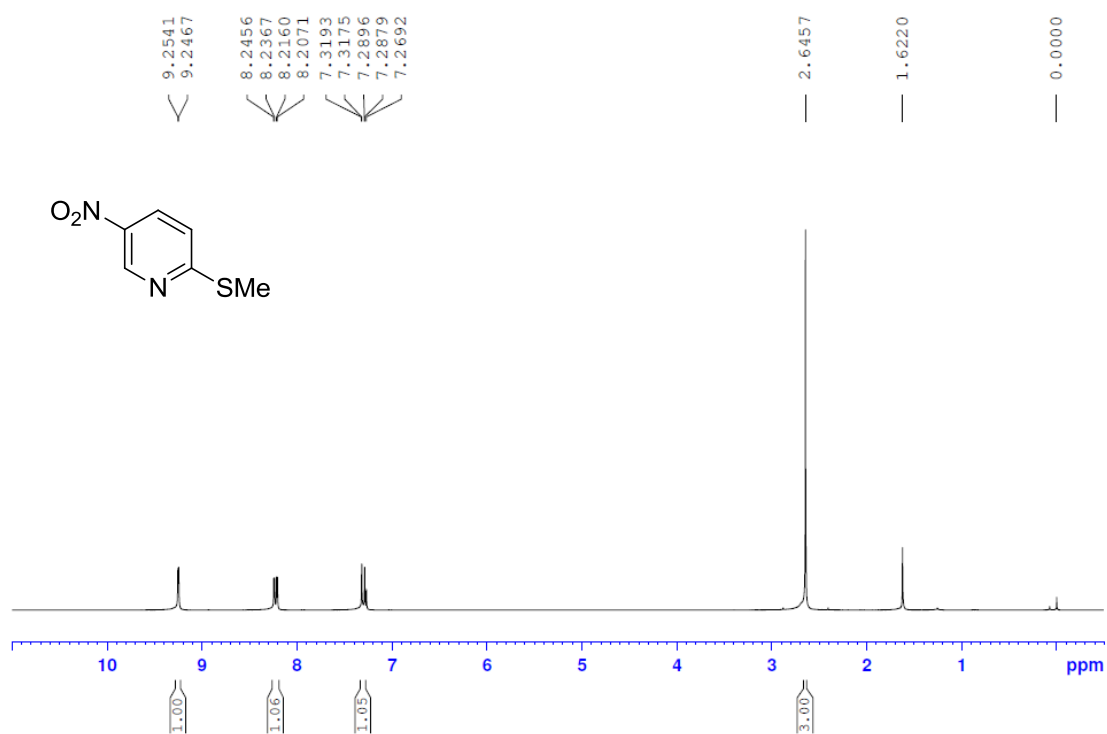

**Figure 23**  $^1\text{H}$  NMR spectrum of compound **3l** (300 MHz,  $\text{CDCl}_3$ )

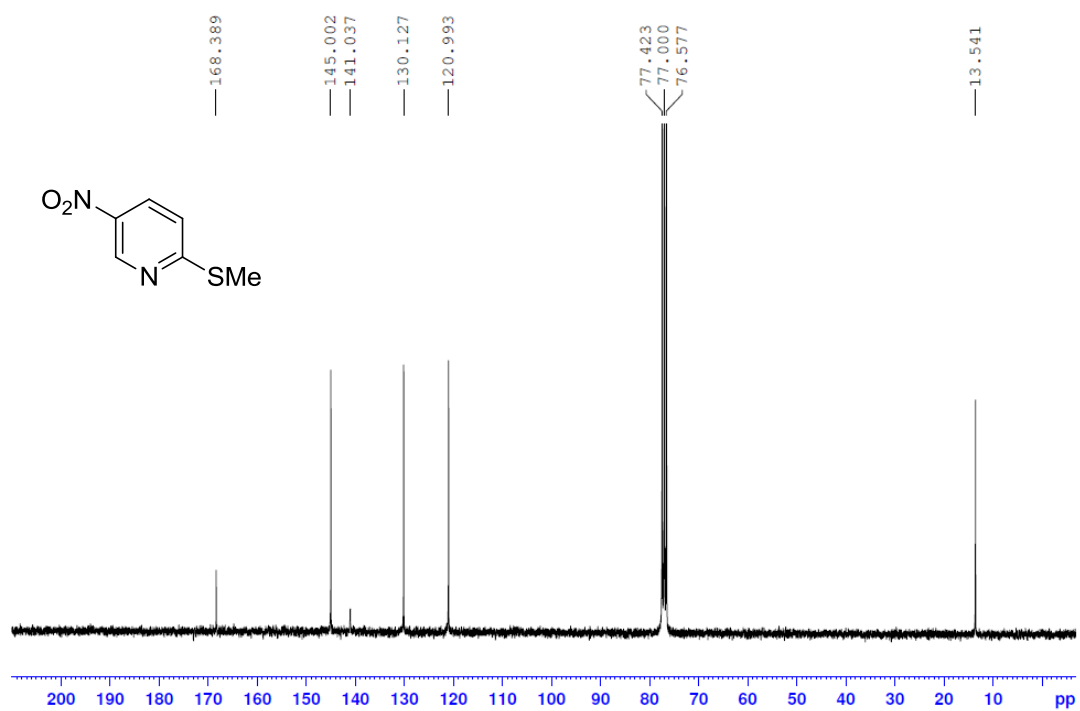

**Figure 24**  $^{13}\text{C}$  NMR spectrum of compound **3l** (75 MHz,  $\text{CDCl}_3$ )

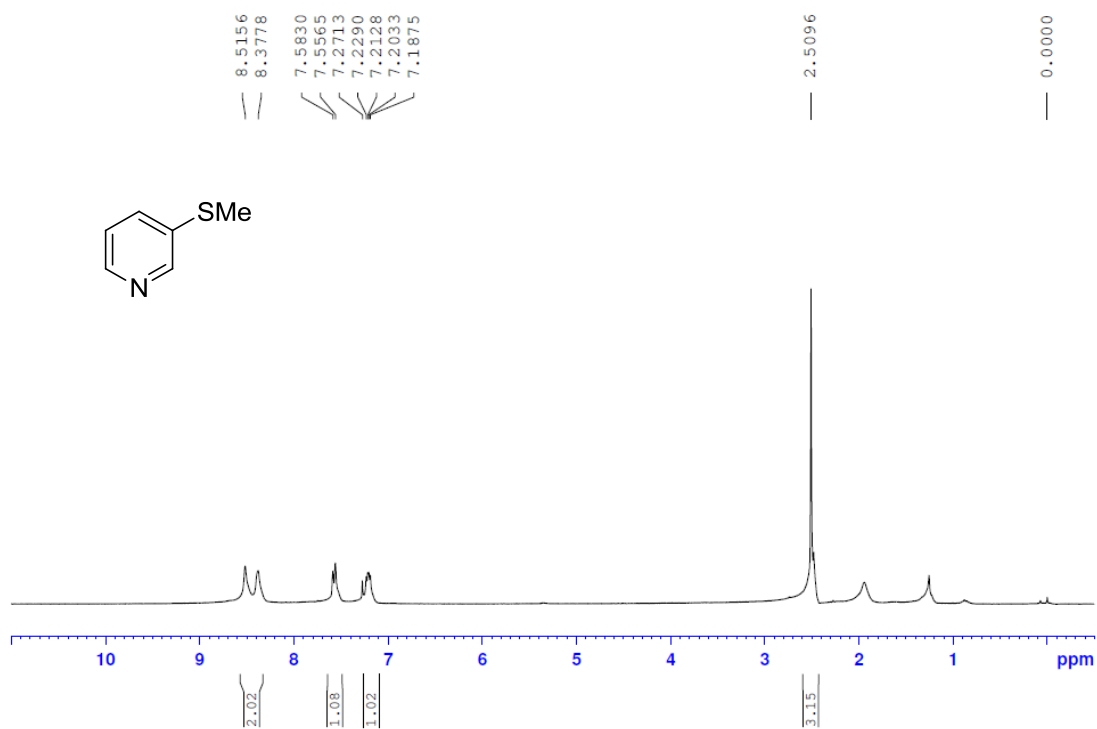

**Figure 25** <sup>1</sup>H NMR spectrum of compound **3m** (300 MHz, CDCl<sub>3</sub>)

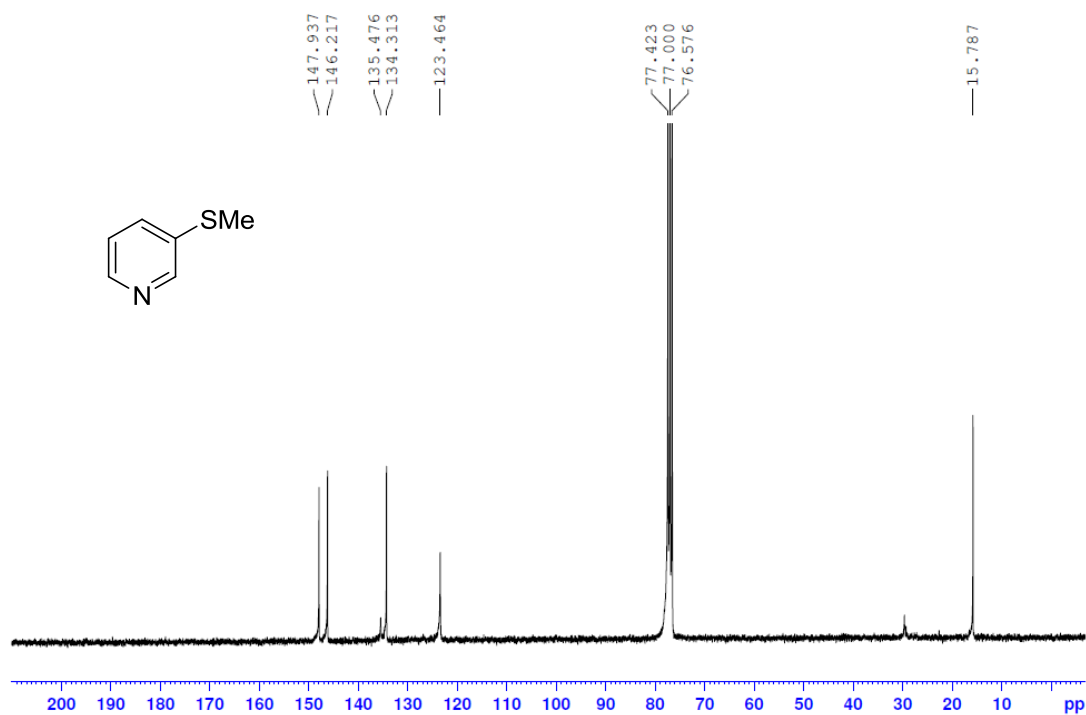

**Figure 26** <sup>13</sup>C NMR spectrum of compound **3m** (75 MHz, CDCl<sub>3</sub>)



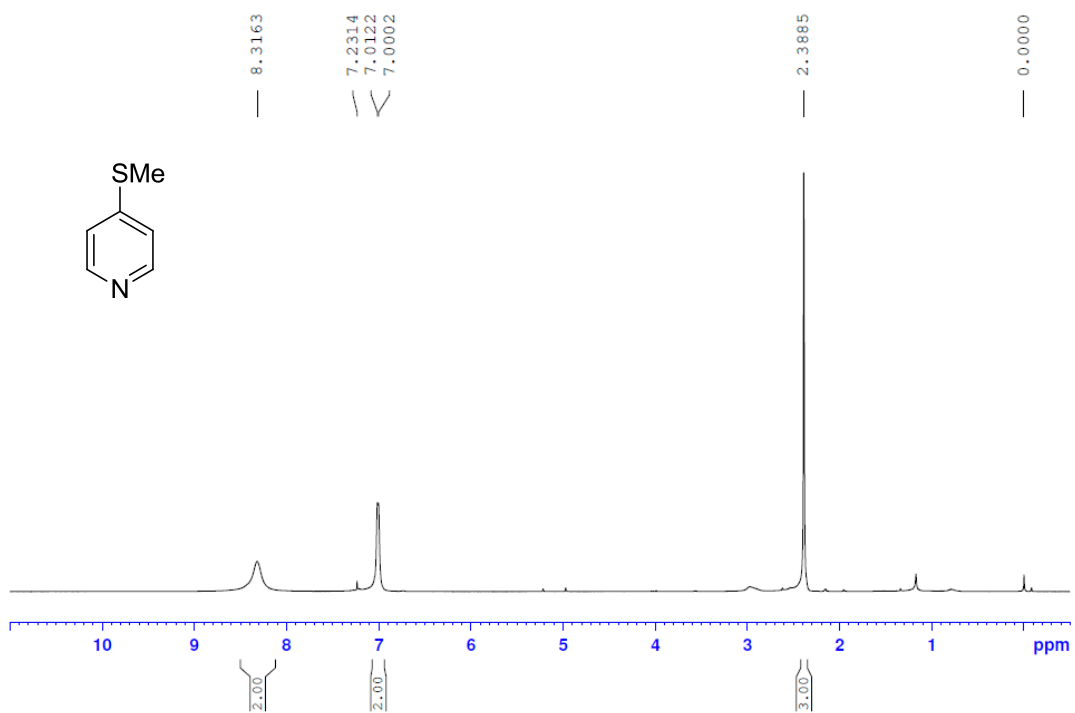

**Figure 27**  $^1\text{H}$  NMR spectrum of compound **3n** (300 MHz,  $\text{CDCl}_3$ )

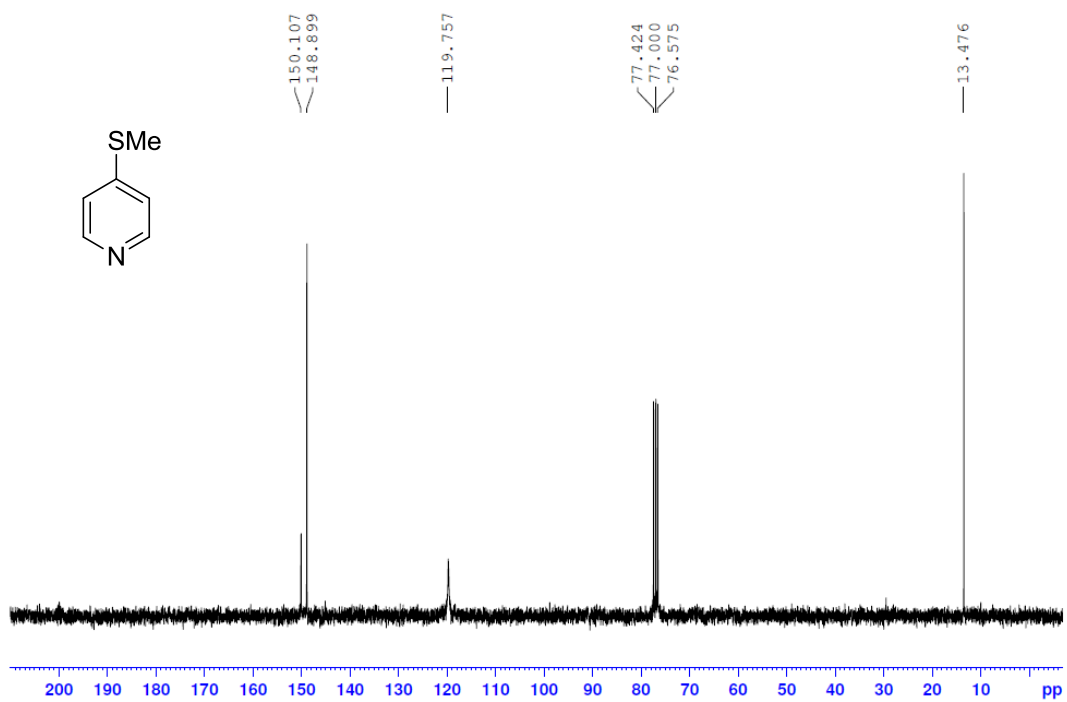

**Figure 28**  $^{13}\text{C}$  NMR spectrum of compound **3n** (75 MHz,  $\text{CDCl}_3$ )

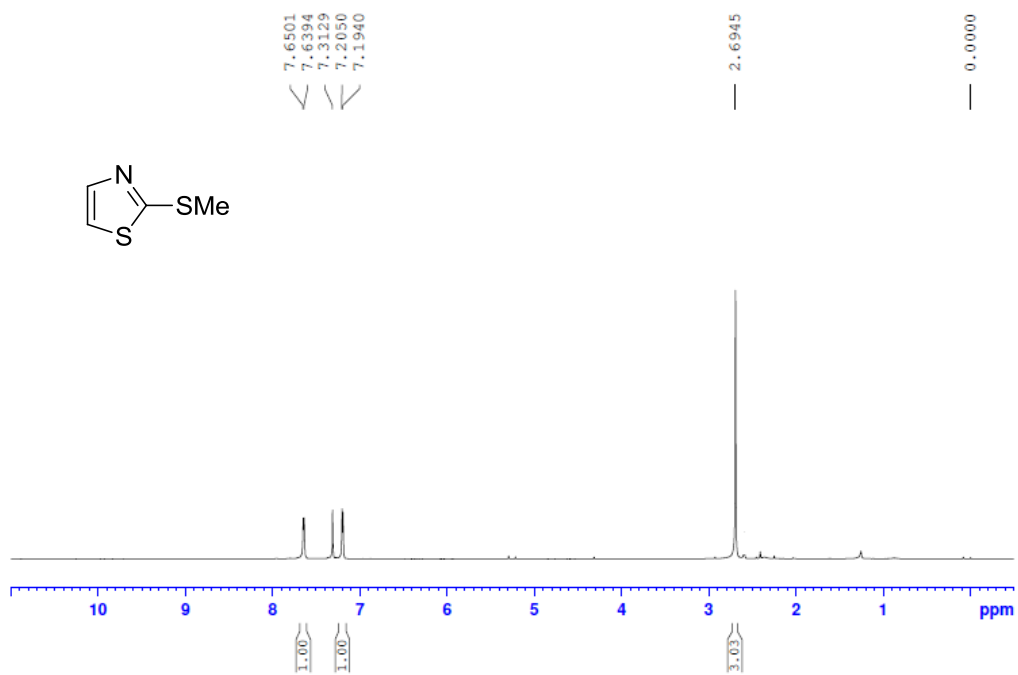

**Figure 29**  $^1\text{H}$  NMR spectrum of compound **3o** (300 MHz,  $\text{CDCl}_3$ )

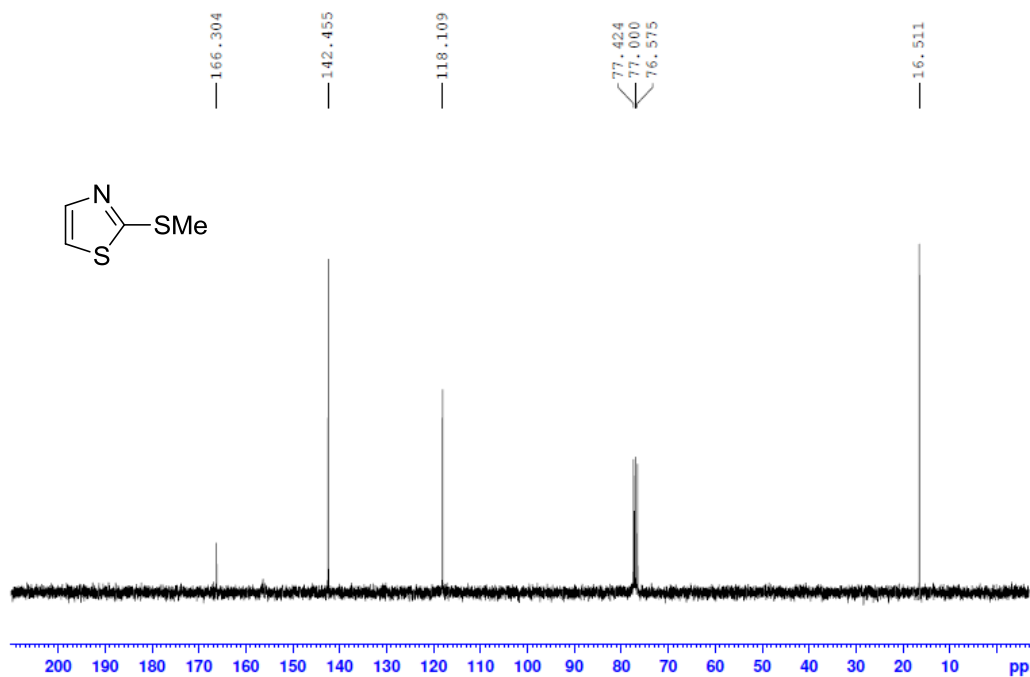

**Figure 30**  $^{13}\text{C}$  NMR spectrum of compound **3o** (75 MHz,  $\text{CDCl}_3$ )

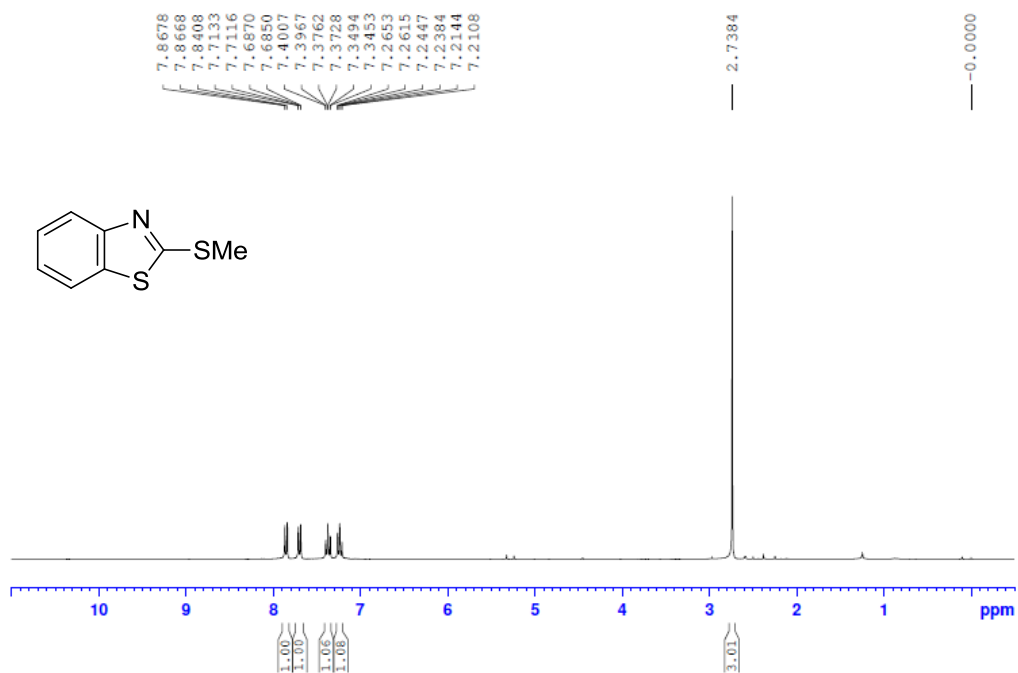

**Figure 31** <sup>1</sup>H NMR spectrum of compound **3p** (300 MHz, CDCl<sub>3</sub>)

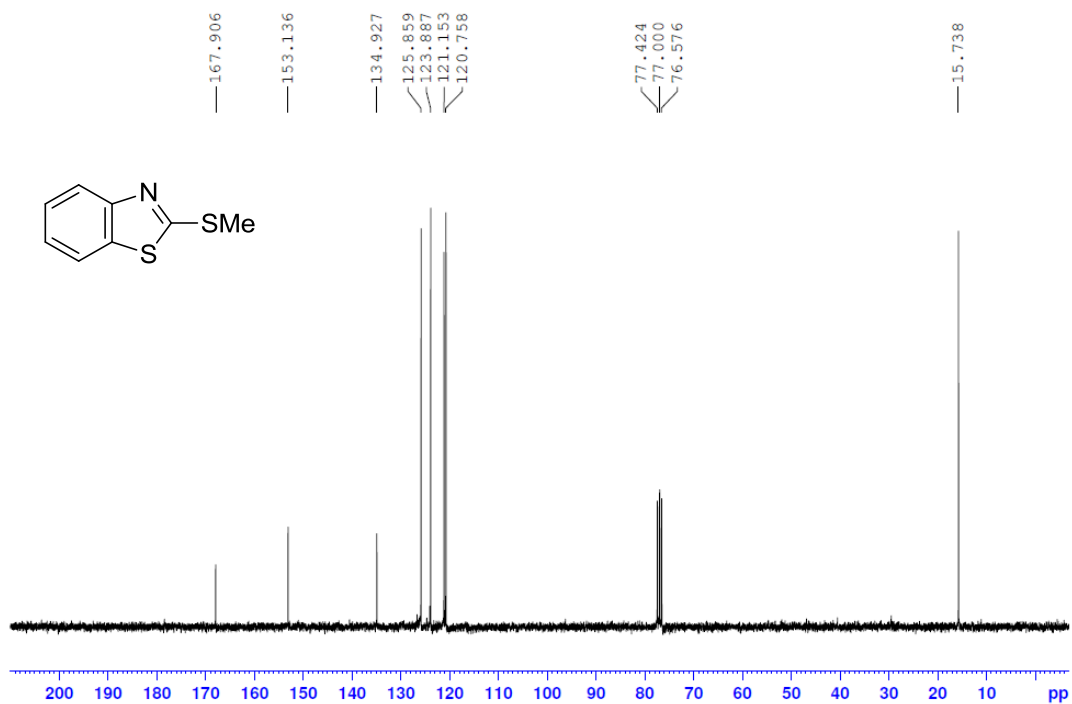

**Figure 32** <sup>13</sup>C NMR spectrum of compound **3p** (75 MHz, CDCl<sub>3</sub>)

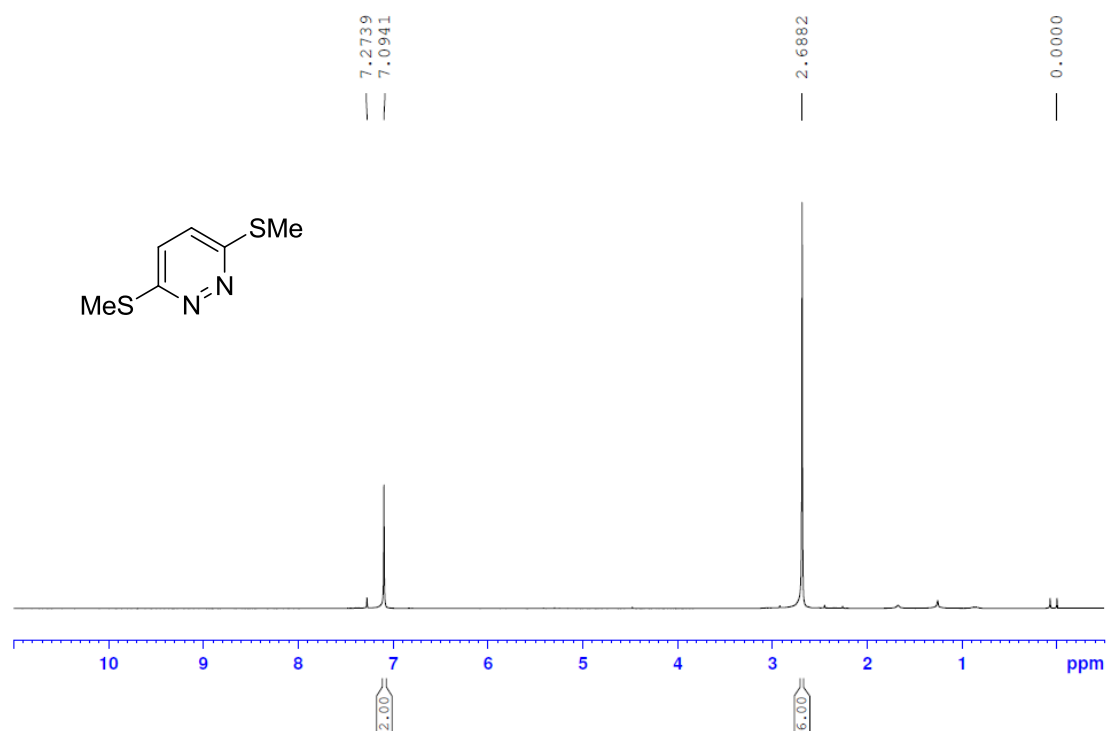

**Figure 33**  $^1\text{H NMR}$  spectrum of compound **3q** (300 MHz,  $\text{CDCl}_3$ )

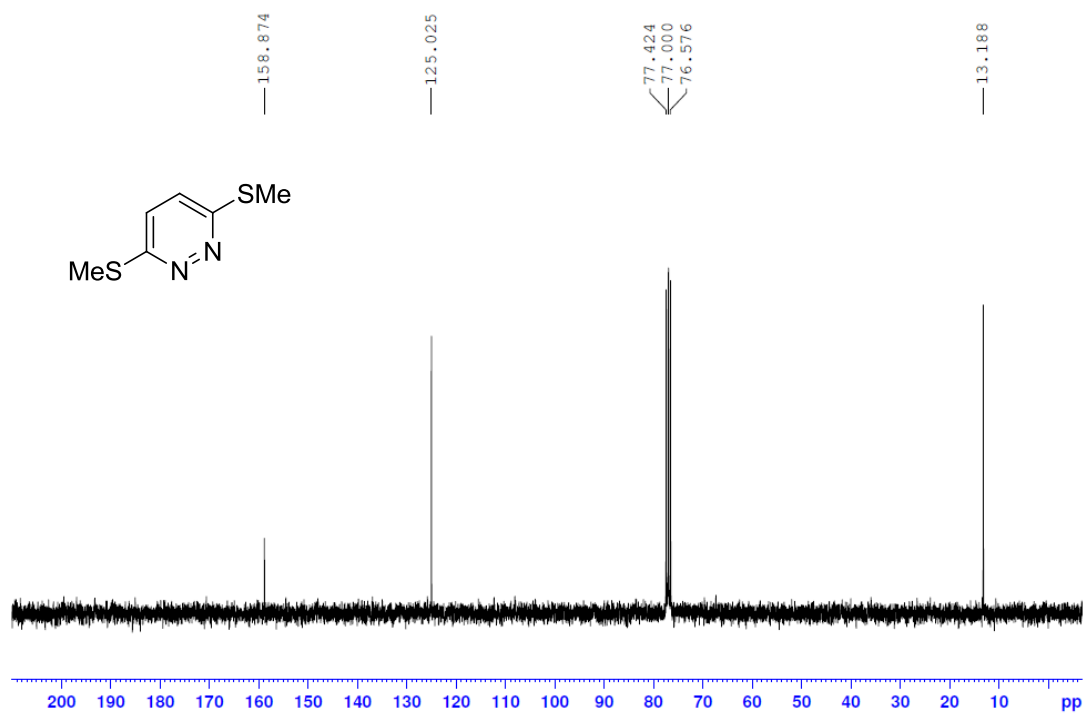

**Figure 34**  $^{13}\text{C NMR}$  spectrum of compound **3q** (75 MHz,  $\text{CDCl}_3$ )

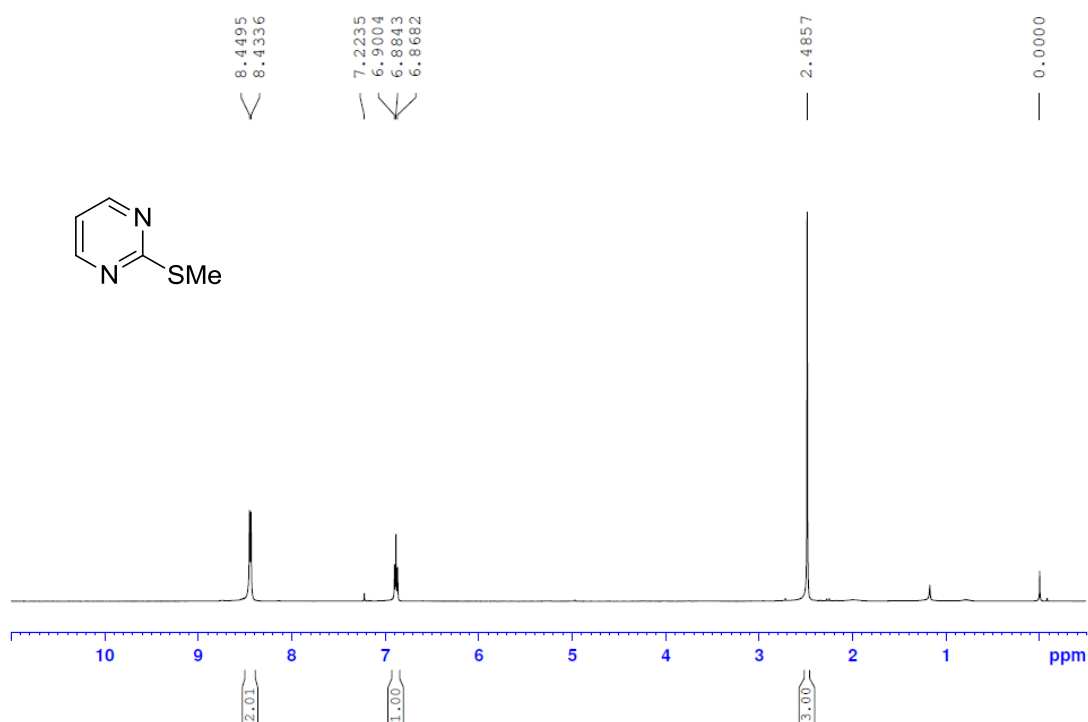

**Figure 35**  $^1\text{H}$  NMR spectrum of compound **3r** (300 MHz,  $\text{CDCl}_3$ )

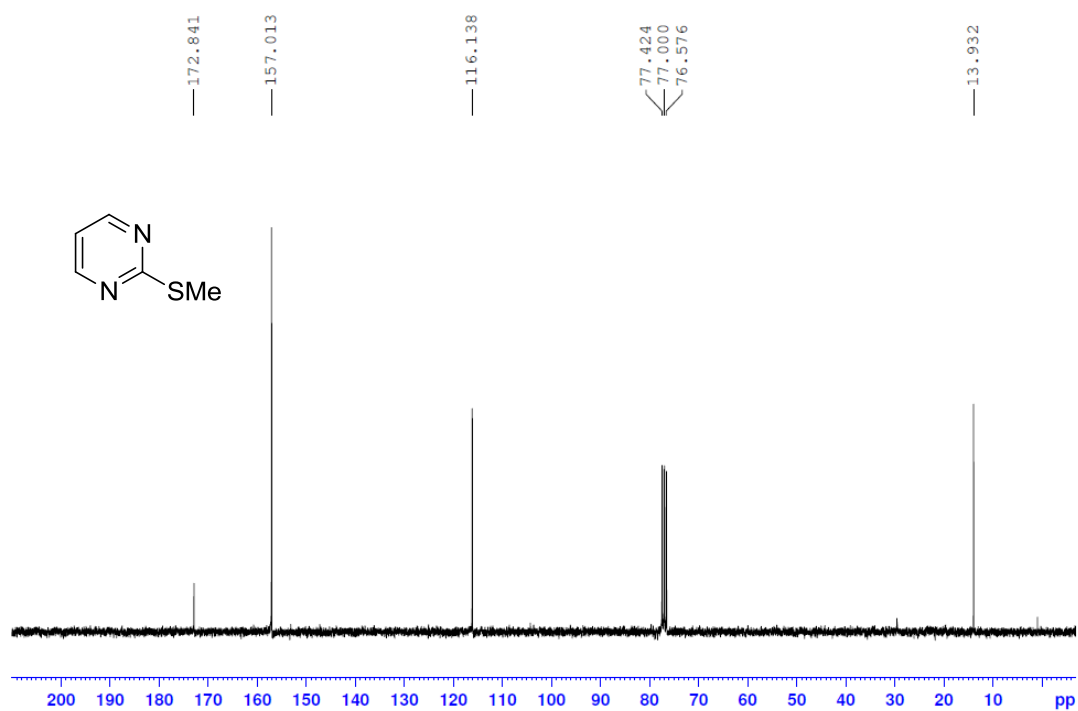

**Figure 36**  $^{13}\text{C}$  NMR spectrum of compound **3r** (75 MHz,  $\text{CDCl}_3$ )

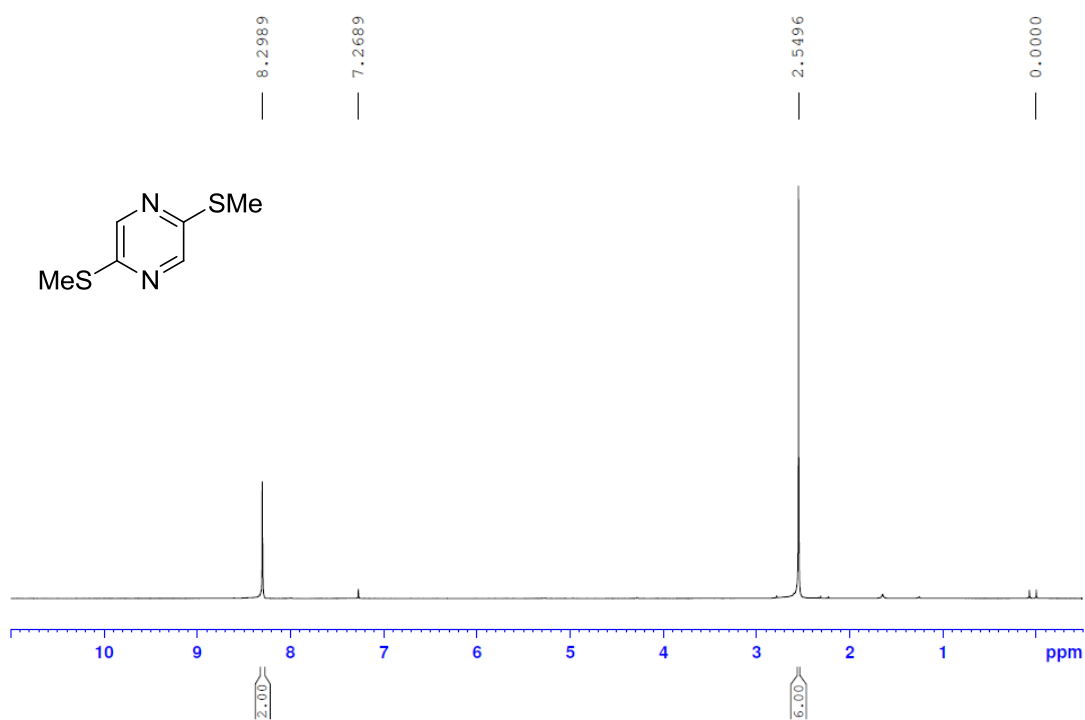

**Figure 37** <sup>1</sup>H NMR spectrum of compound **3s** (300 MHz, CDCl<sub>3</sub>)

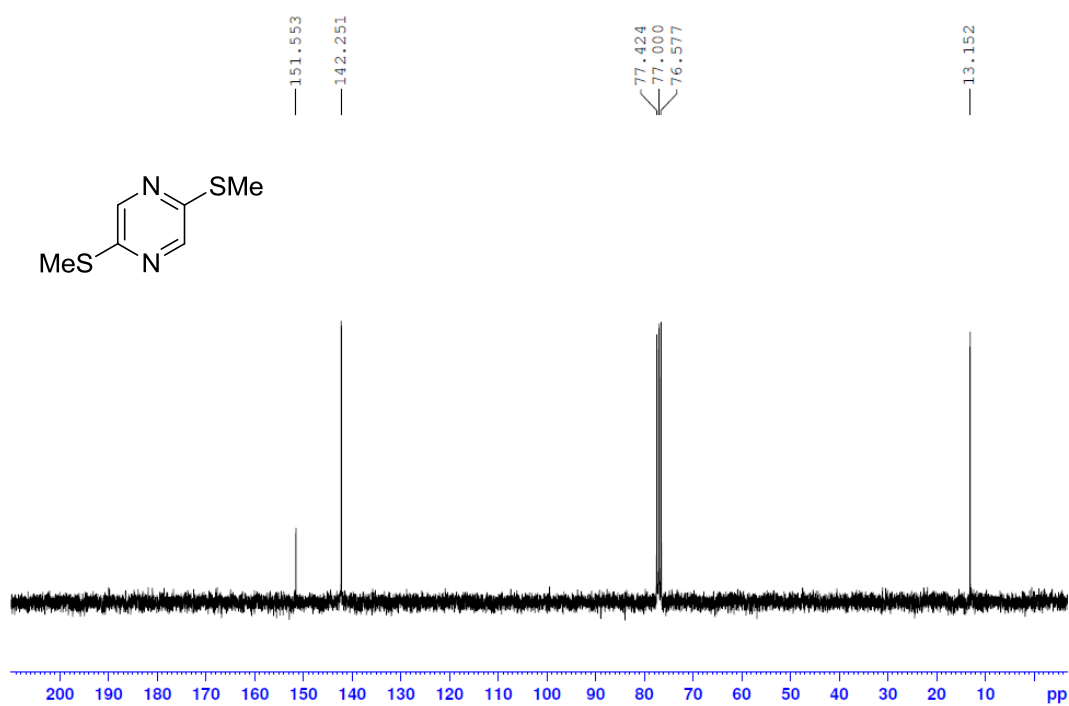

**Figure 38** <sup>13</sup>C NMR spectrum of compound **3s** (75 MHz, CDCl<sub>3</sub>)

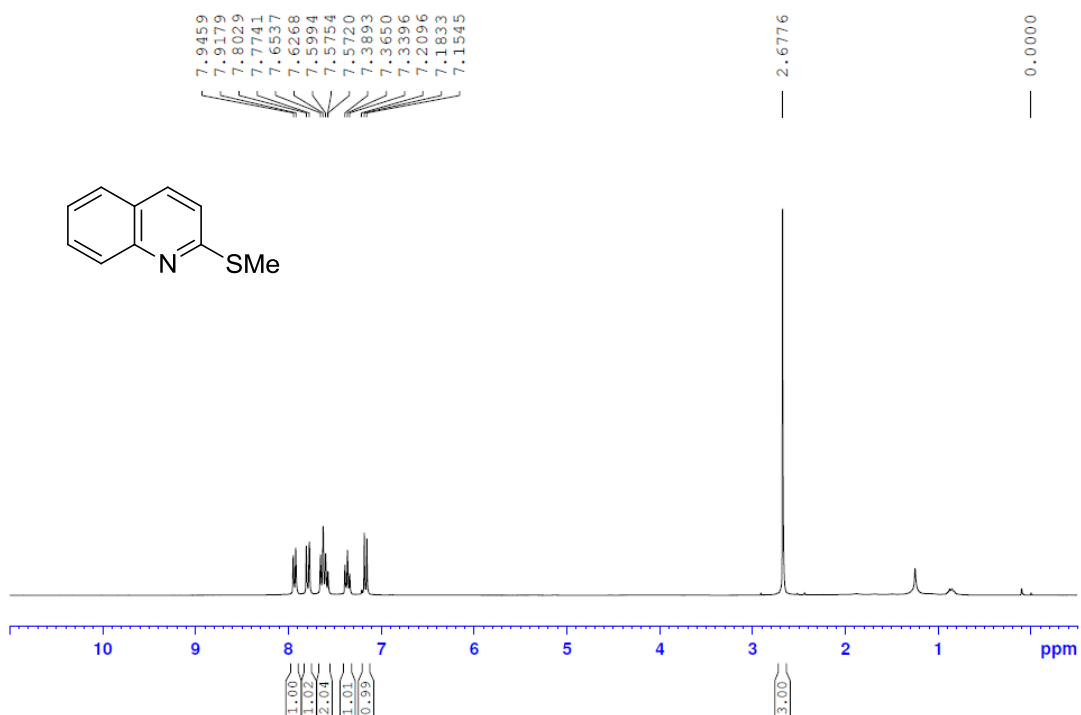

**Figure 39**  $^1\text{H NMR}$  spectrum of compound **3t** (300 MHz,  $\text{CDCl}_3$ )

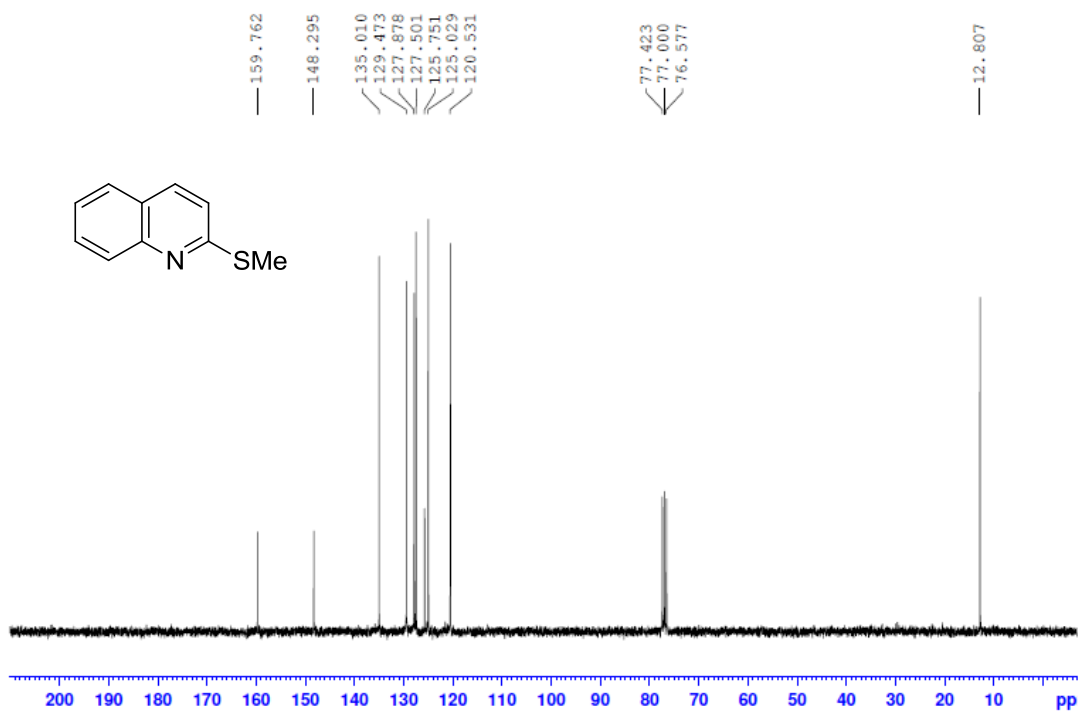

**Figure 40**  $^{13}\text{C NMR}$  spectrum of compound **3t** (75 MHz,  $\text{CDCl}_3$ )

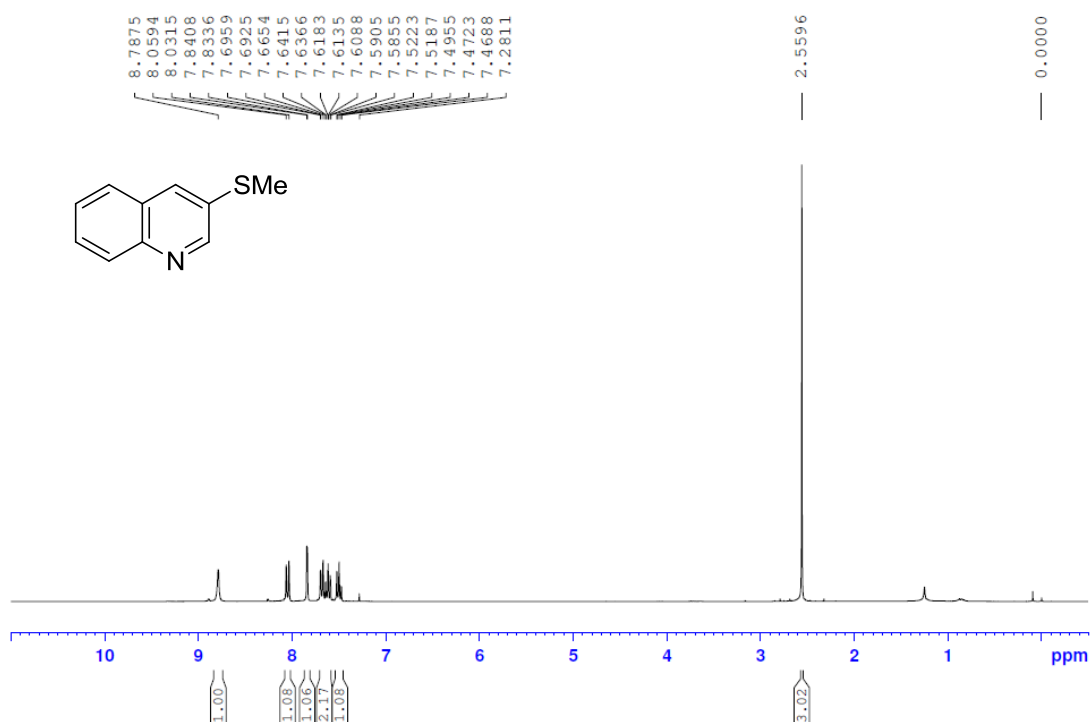

**Figure 41** <sup>1</sup>H NMR spectrum of compound **3u** (300 MHz, CDCl<sub>3</sub>)

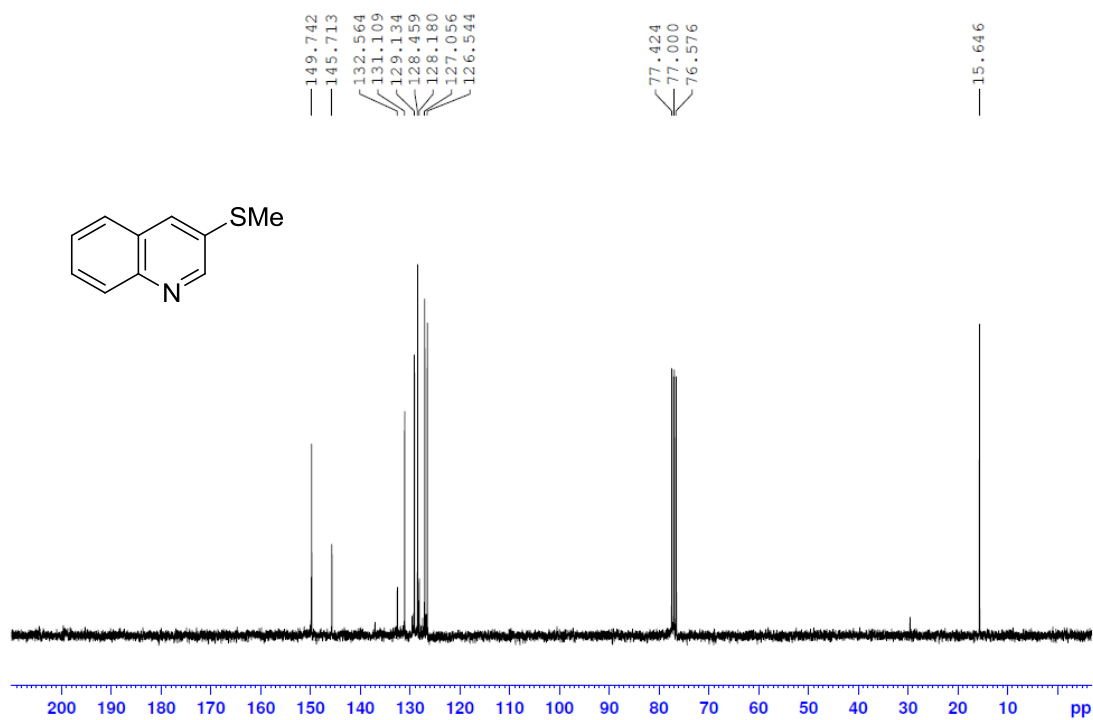

**Figure 42** <sup>13</sup>C NMR spectrum of compound **3u** (75 MHz, CDCl<sub>3</sub>)



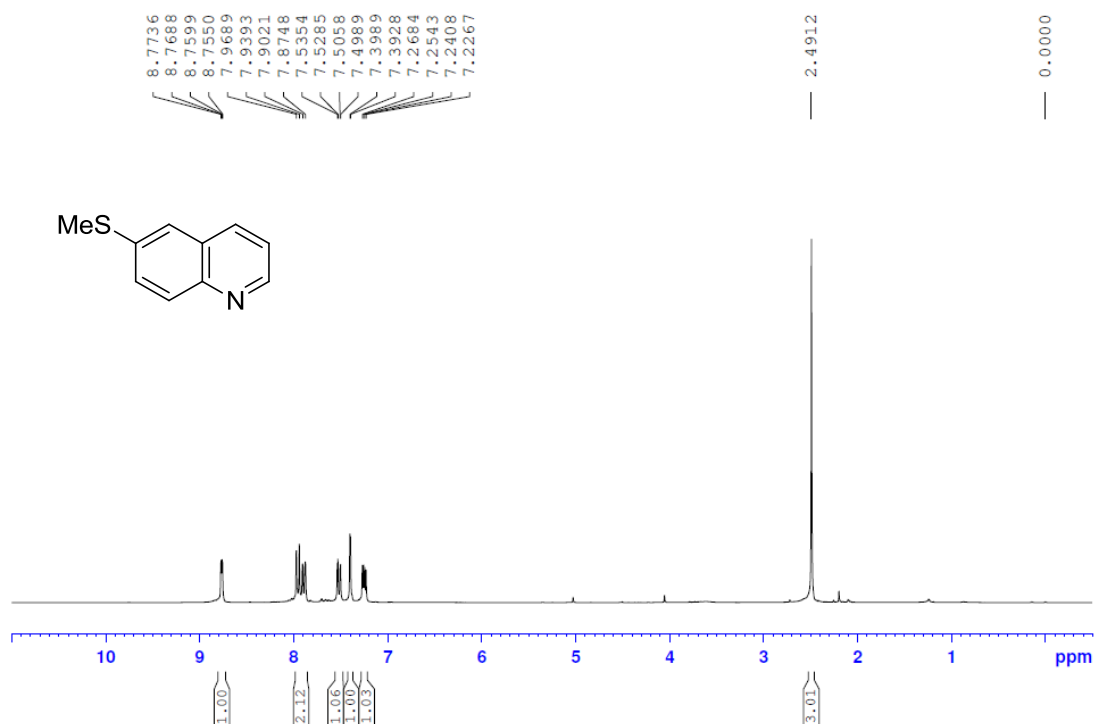

**Figure 43** <sup>1</sup>H NMR spectrum of compound **3v** (300 MHz, CDCl<sub>3</sub>)

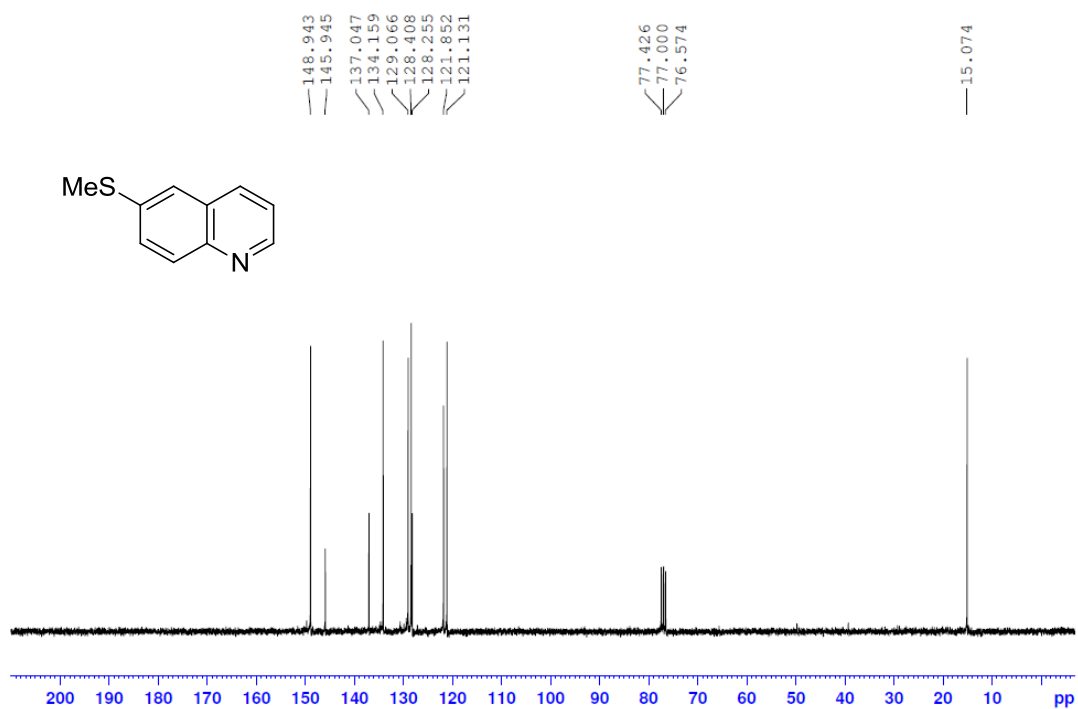

**Figure 44** <sup>13</sup>C NMR spectrum of compound **3v** (75 MHz, CDCl<sub>3</sub>)

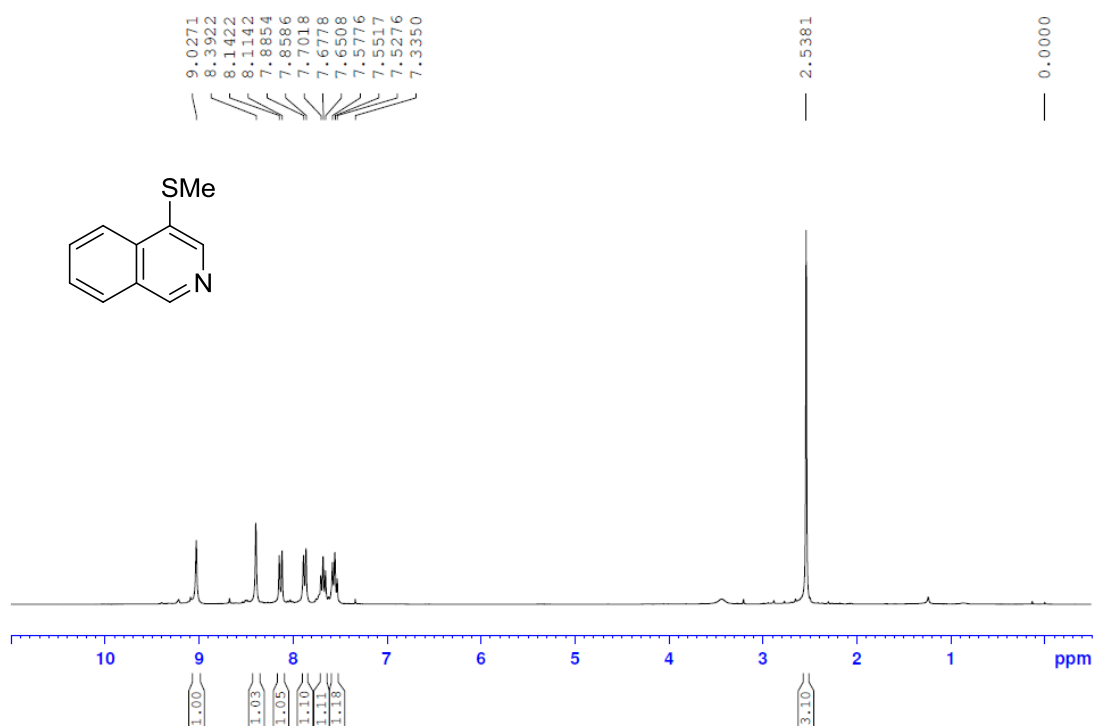

**Figure 45** <sup>1</sup>H NMR spectrum of compound **3w** (300 MHz, CDCl<sub>3</sub>)

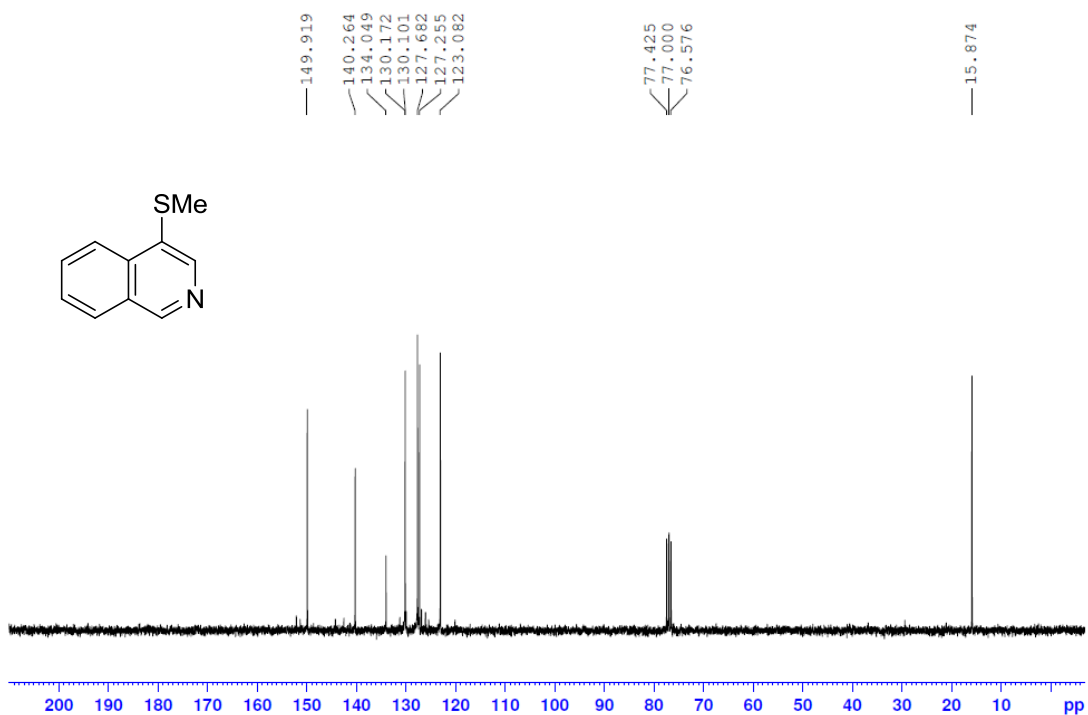

**Figure 46** <sup>13</sup>C NMR spectrum of compound **3w** (75 MHz, CDCl<sub>3</sub>)

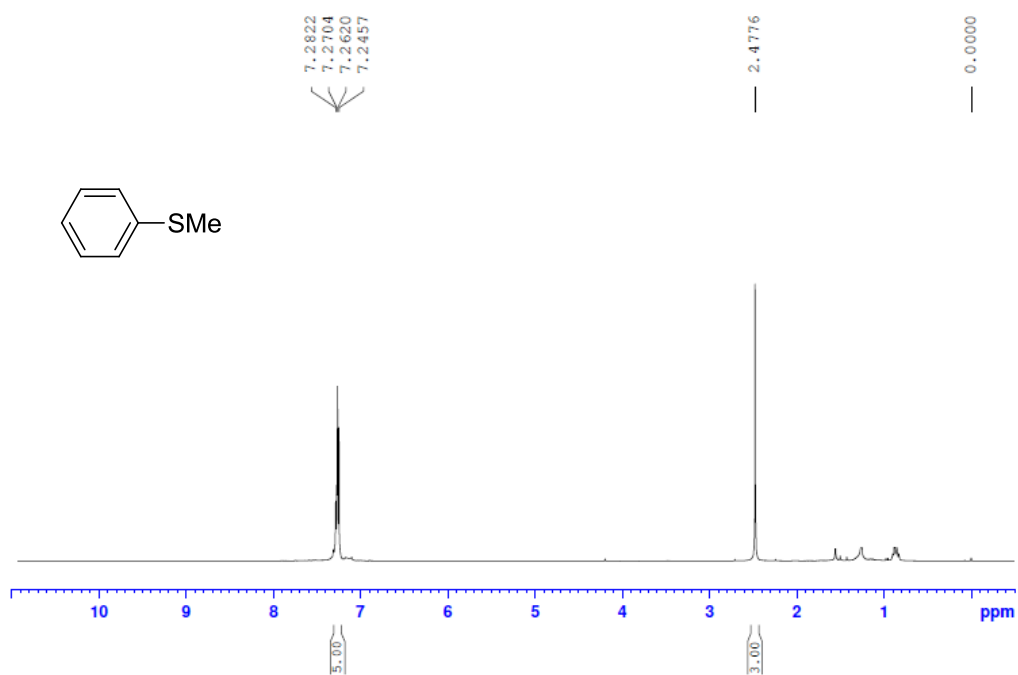

**Figure 47** <sup>1</sup>H NMR spectrum of compound **4a** (300 MHz, CDCl<sub>3</sub>)

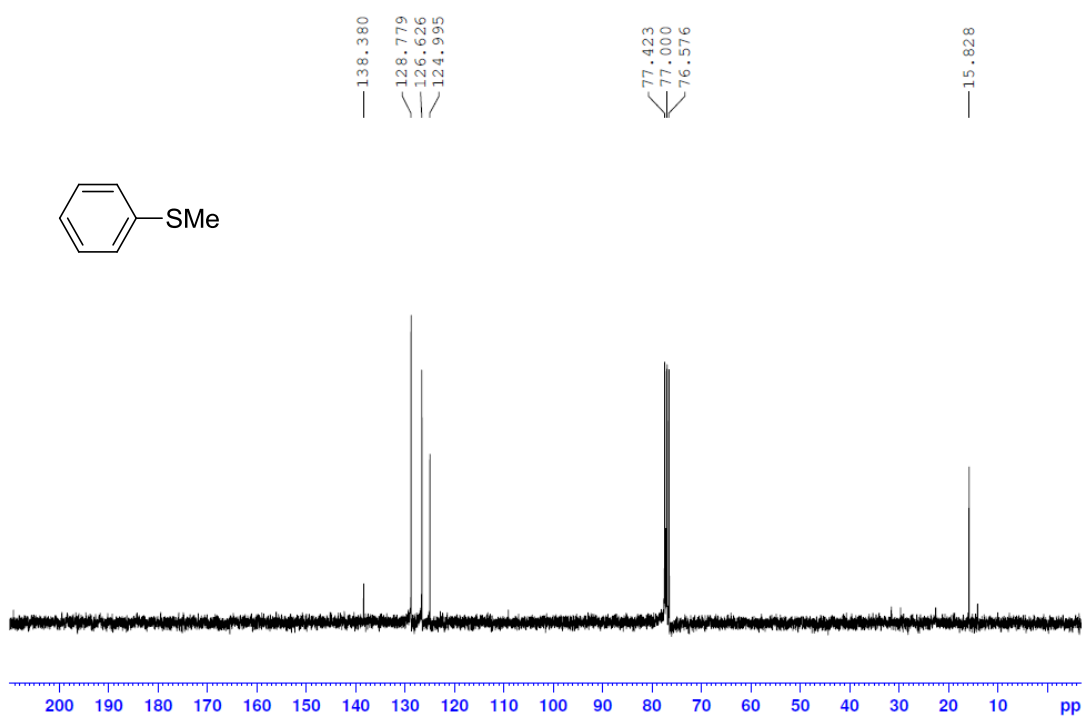

**Figure 48** <sup>13</sup>C NMR spectrum of compound **4a** (75 MHz, CDCl<sub>3</sub>)

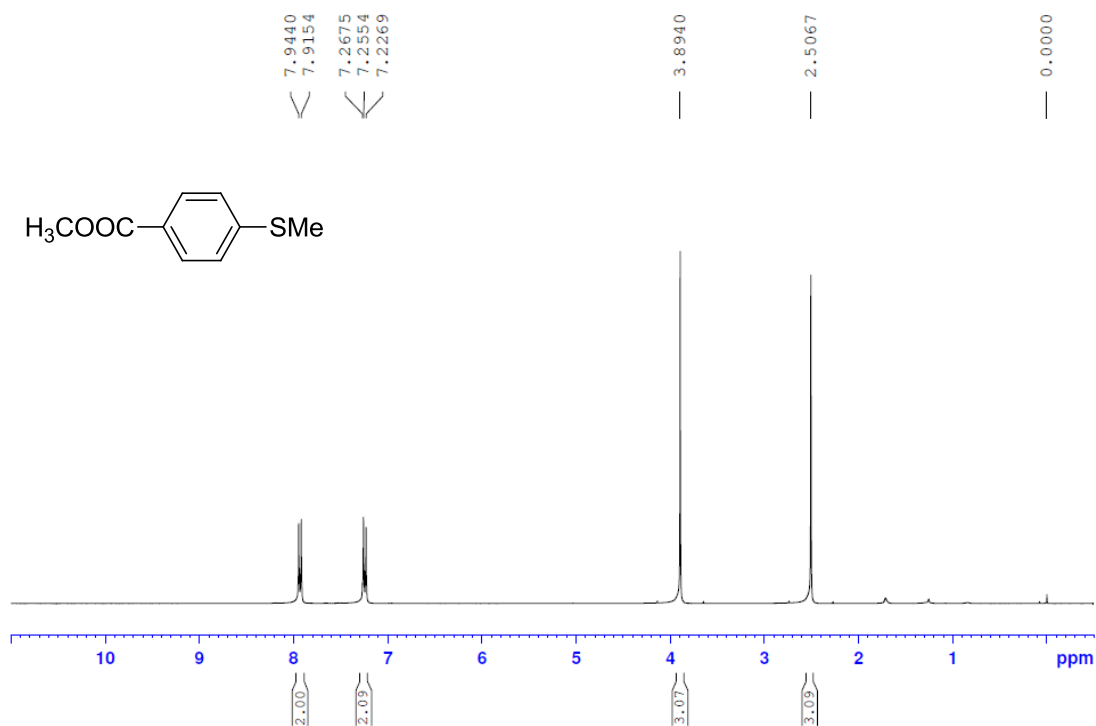

**Figure 49**  $^1\text{H}$  NMR spectrum of compound **4b** (300 MHz,  $\text{CDCl}_3$ )

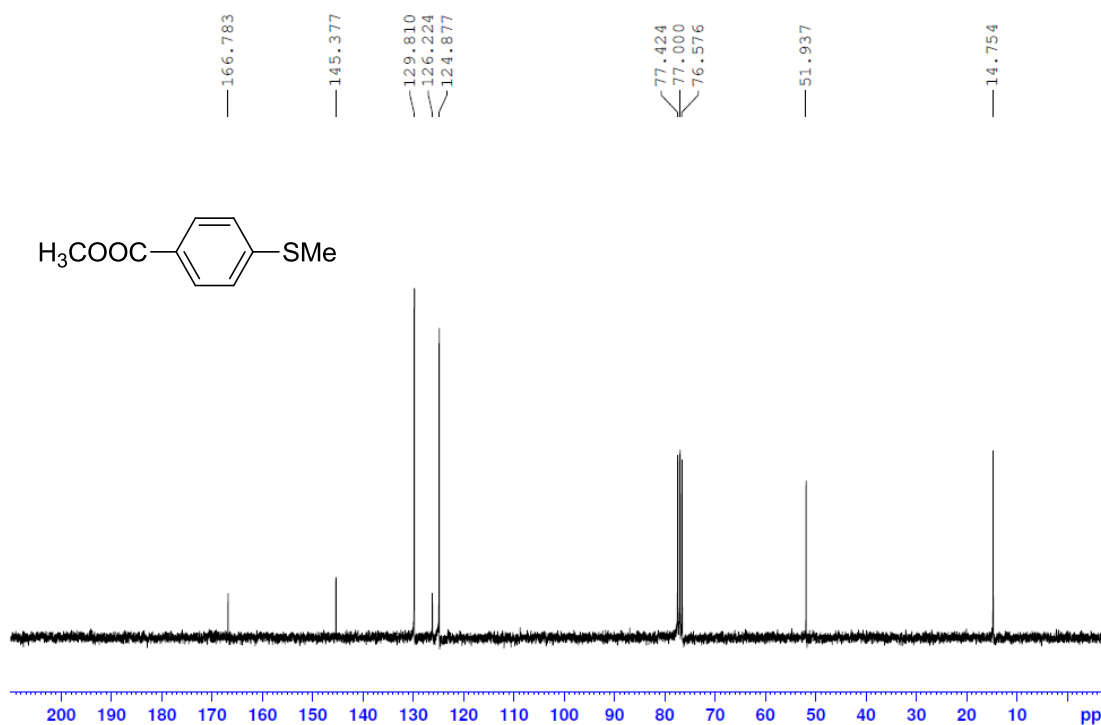

**Figure 50**  $^{13}\text{C}$  NMR spectrum of compound **4b** (75 MHz,  $\text{CDCl}_3$ )

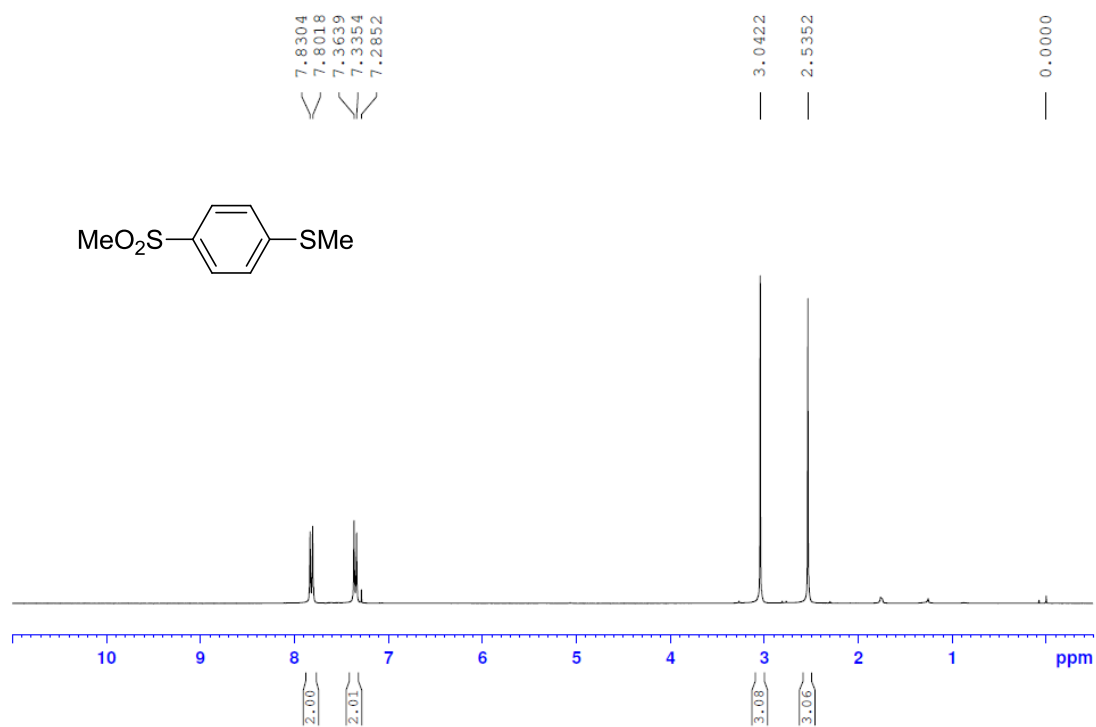

**Figure 51**  $^1\text{H}$  NMR spectrum of compound **4c** (300 MHz,  $\text{CDCl}_3$ )

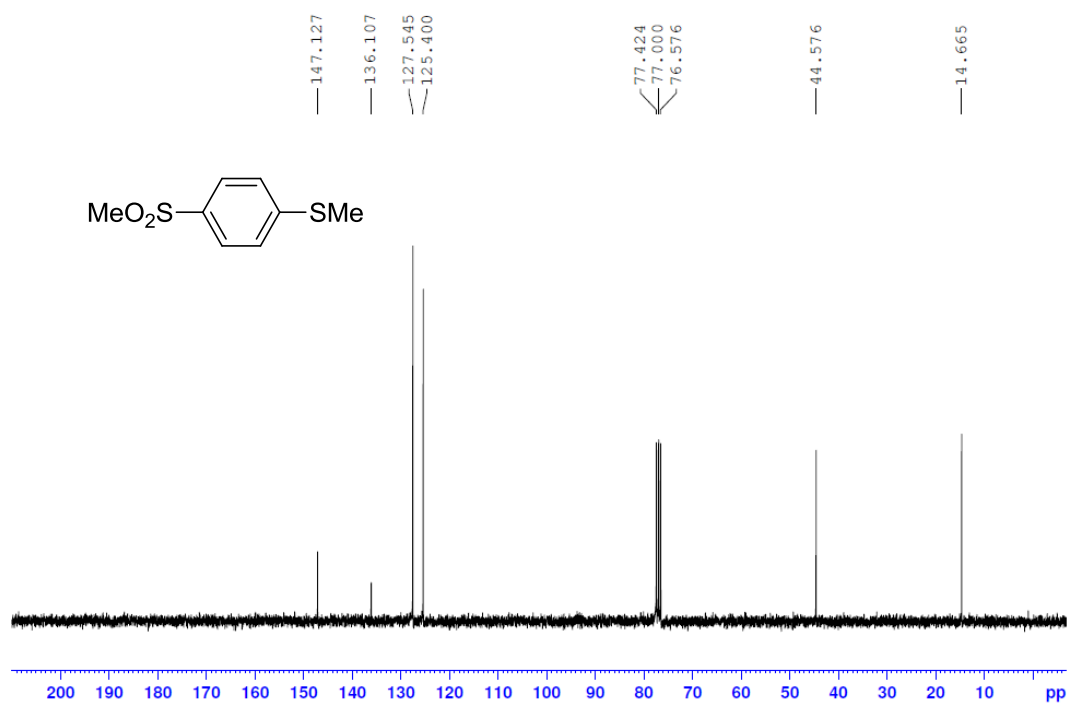

**Figure 52**  $^{13}\text{C}$  NMR spectrum of compound **4c** (75 MHz,  $\text{CDCl}_3$ )

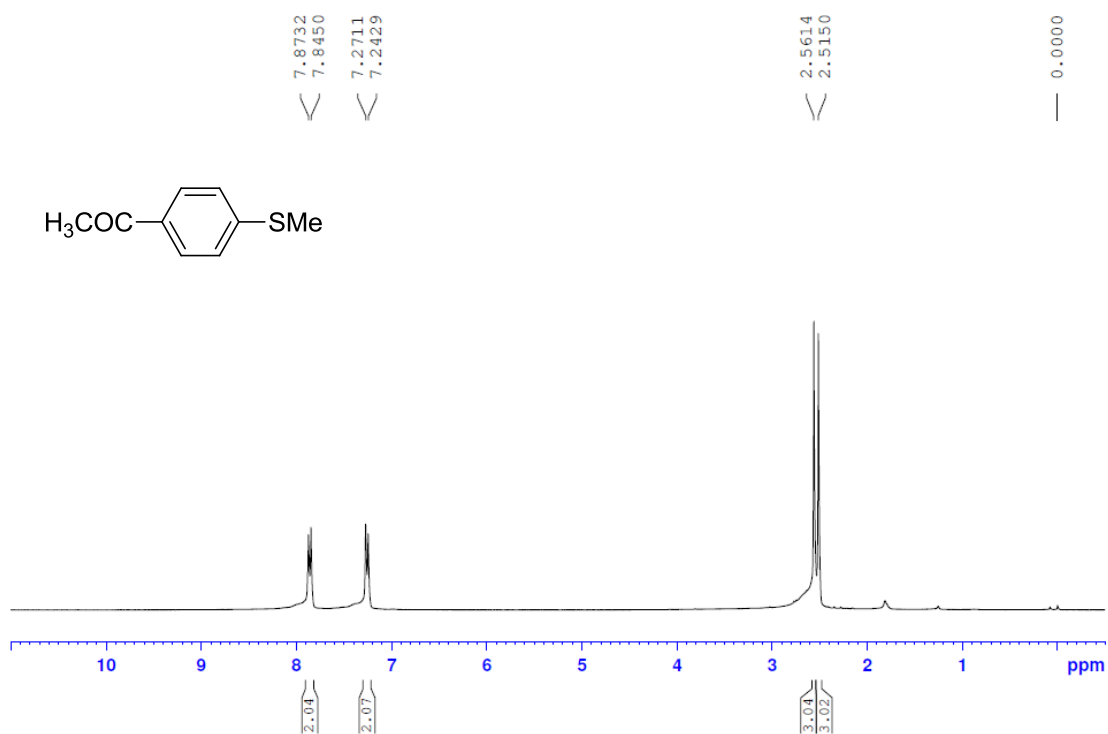

**Figure 53**  $^1\text{H}$  NMR spectrum of compound **4d** (300 MHz,  $\text{CDCl}_3$ )

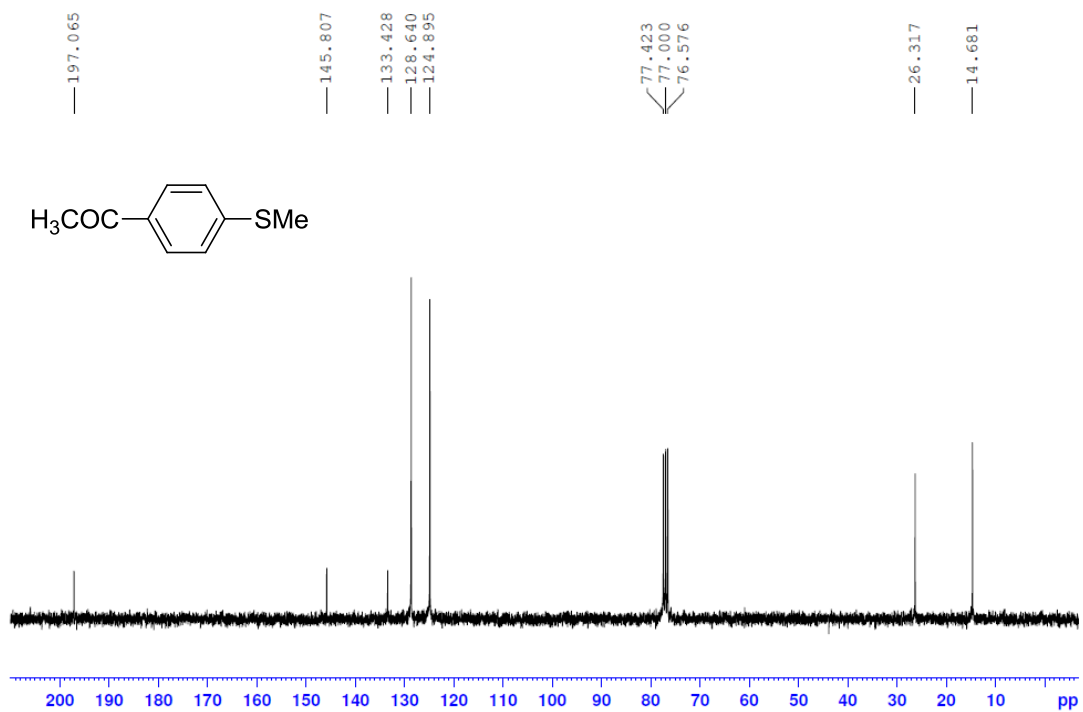

**Figure 54**  $^{13}\text{C}$  NMR spectrum of compound **4d** (75 MHz,  $\text{CDCl}_3$ )

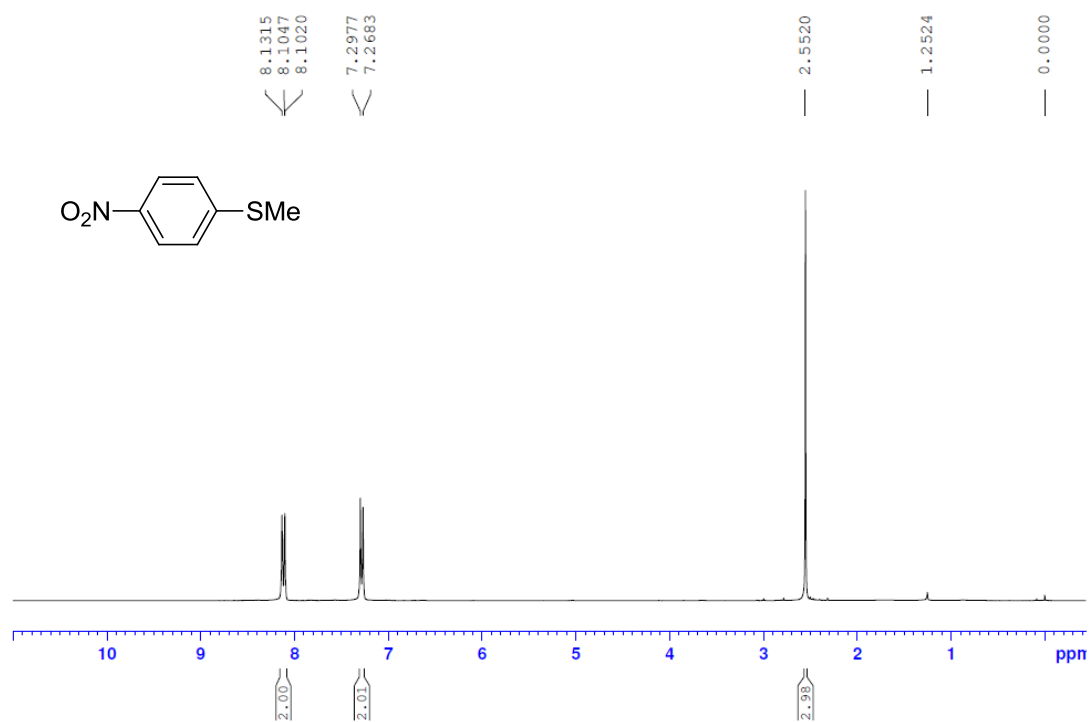

**Figure 55**  $^1\text{H}$  NMR spectrum of compound **4e** (300 MHz,  $\text{CDCl}_3$ )

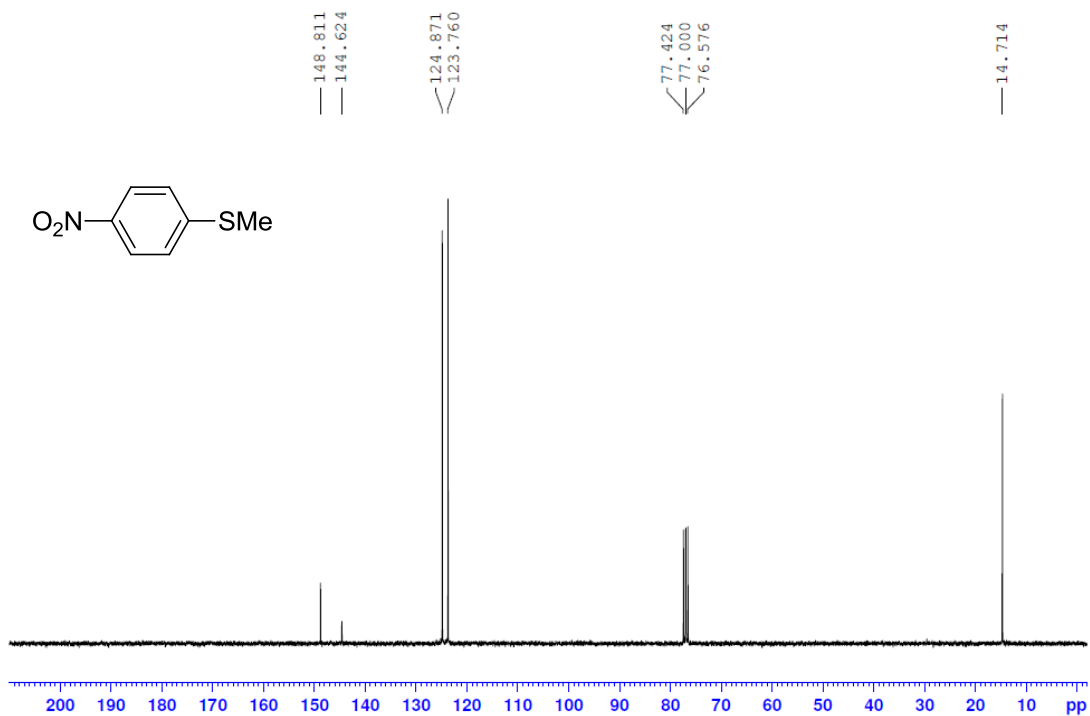

**Figure 56**  $^{13}\text{C}$  NMR spectrum of compound **4e** (75 MHz,  $\text{CDCl}_3$ )

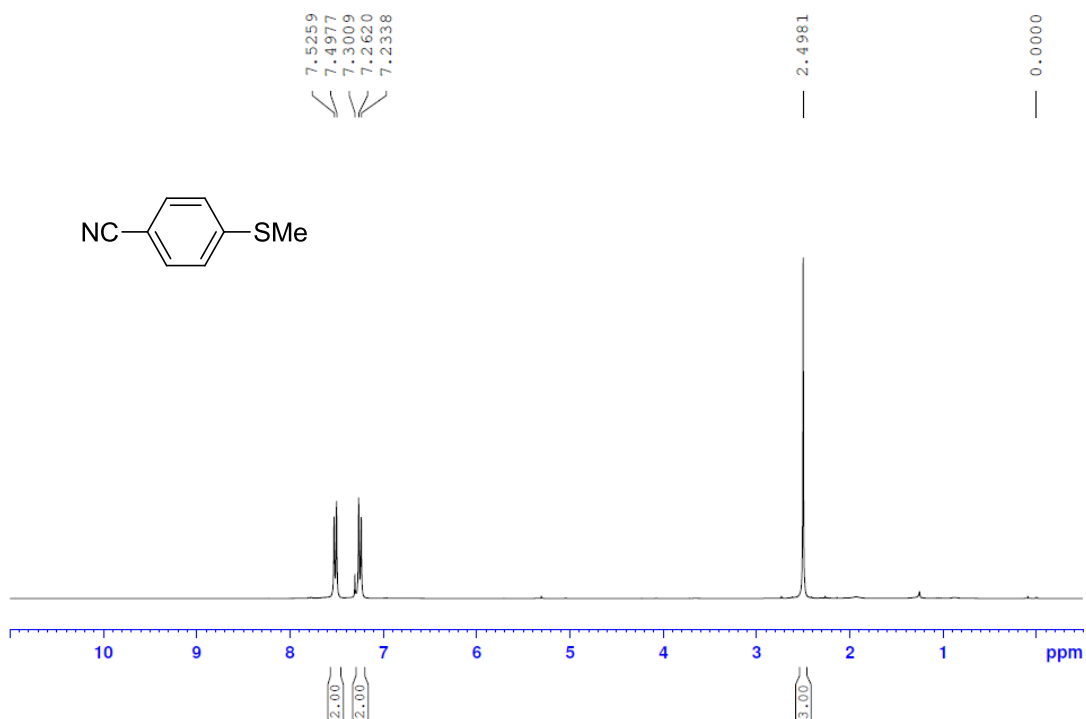

**Figure 57** <sup>1</sup>H NMR spectrum of compound **4f** (300 MHz, CDCl<sub>3</sub>)

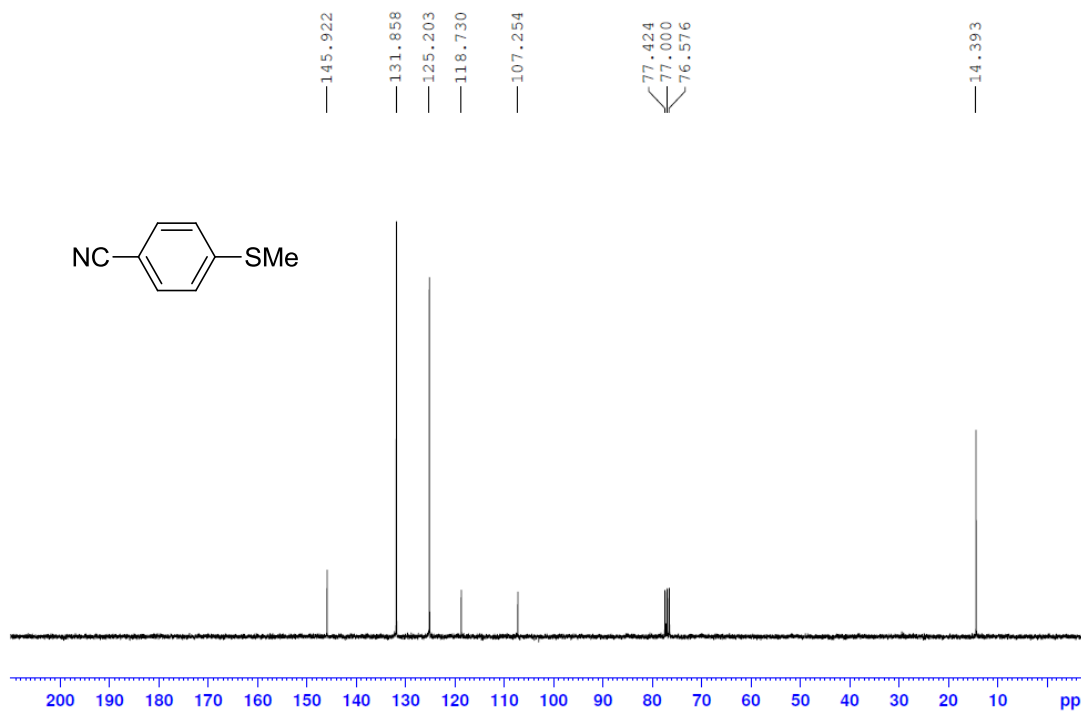

**Figure 58** <sup>13</sup>C NMR spectrum of compound **4f** (75 MHz, CDCl<sub>3</sub>)



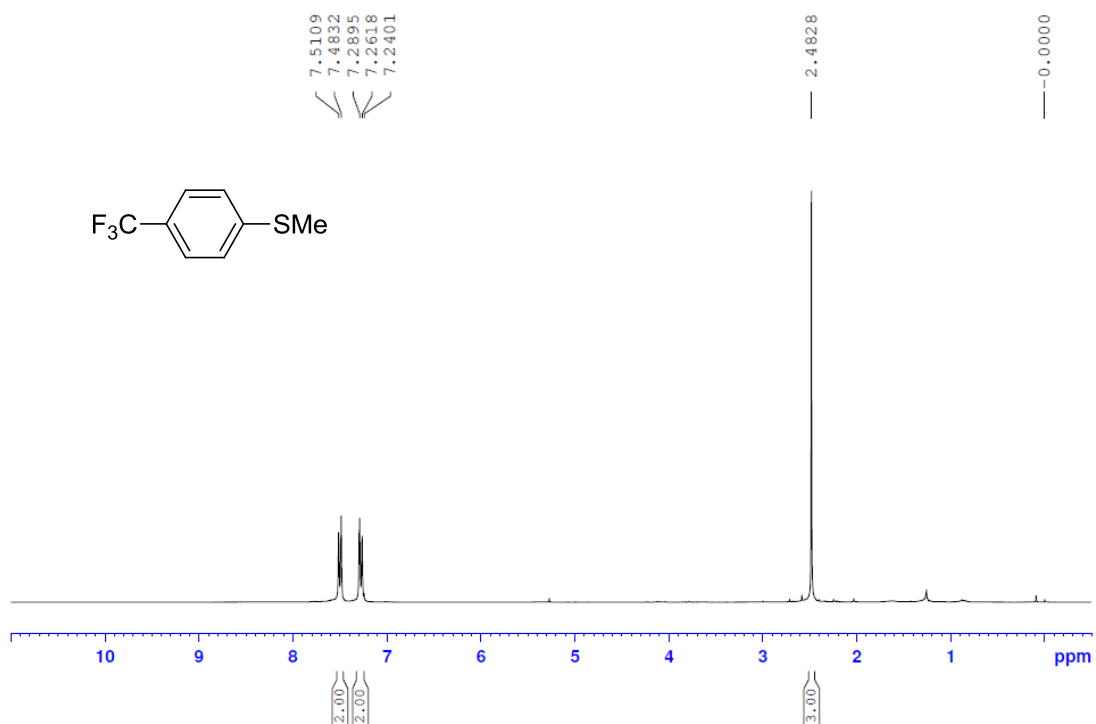

**Figure 59** <sup>1</sup>H NMR spectrum of compound **4g** (300 MHz, CDCl<sub>3</sub>)

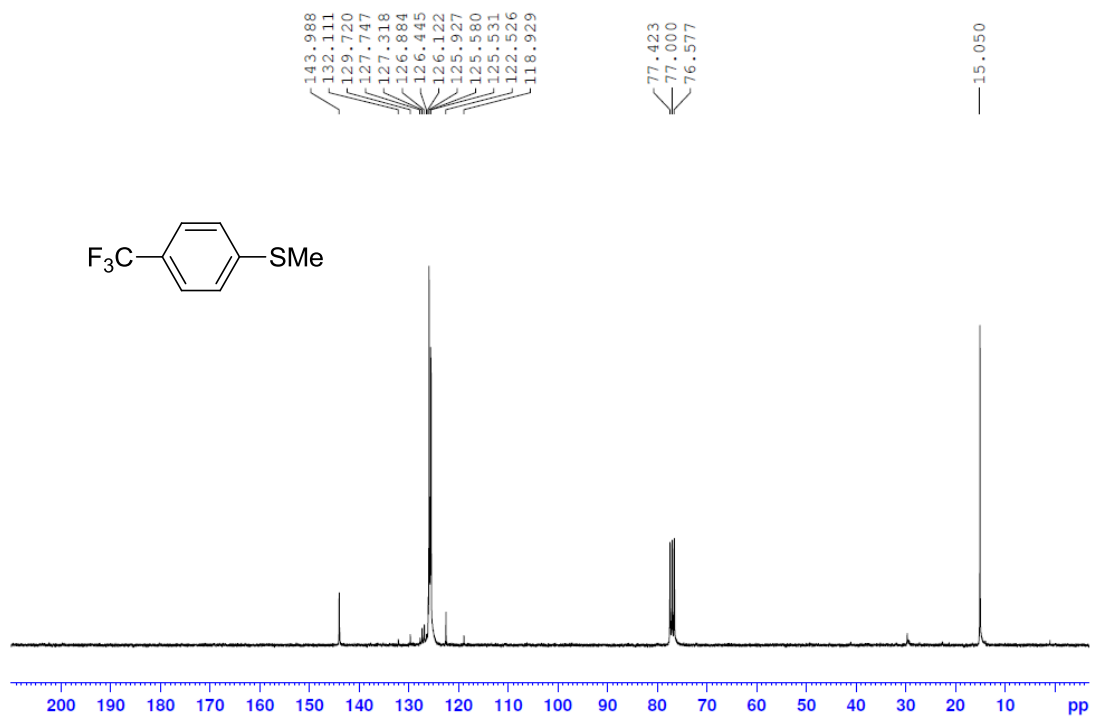

**Figure 60** <sup>13</sup>C NMR spectrum of compound **4g** (75 MHz, CDCl<sub>3</sub>)

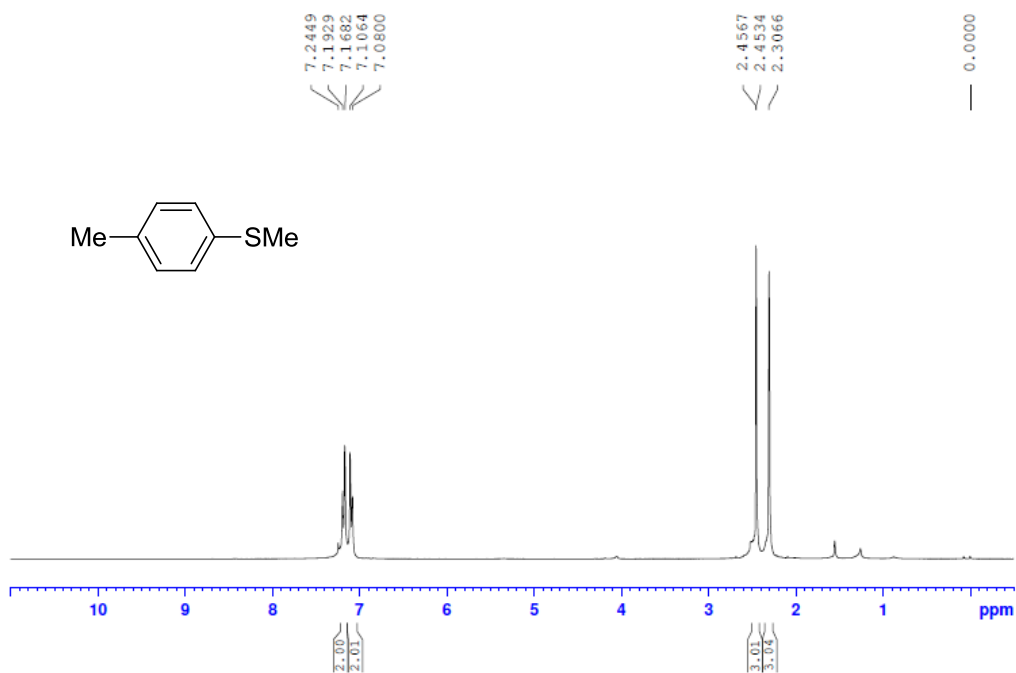

**Figure 61** <sup>1</sup>H NMR spectrum of compound **4h** (300 MHz, CDCl<sub>3</sub>)

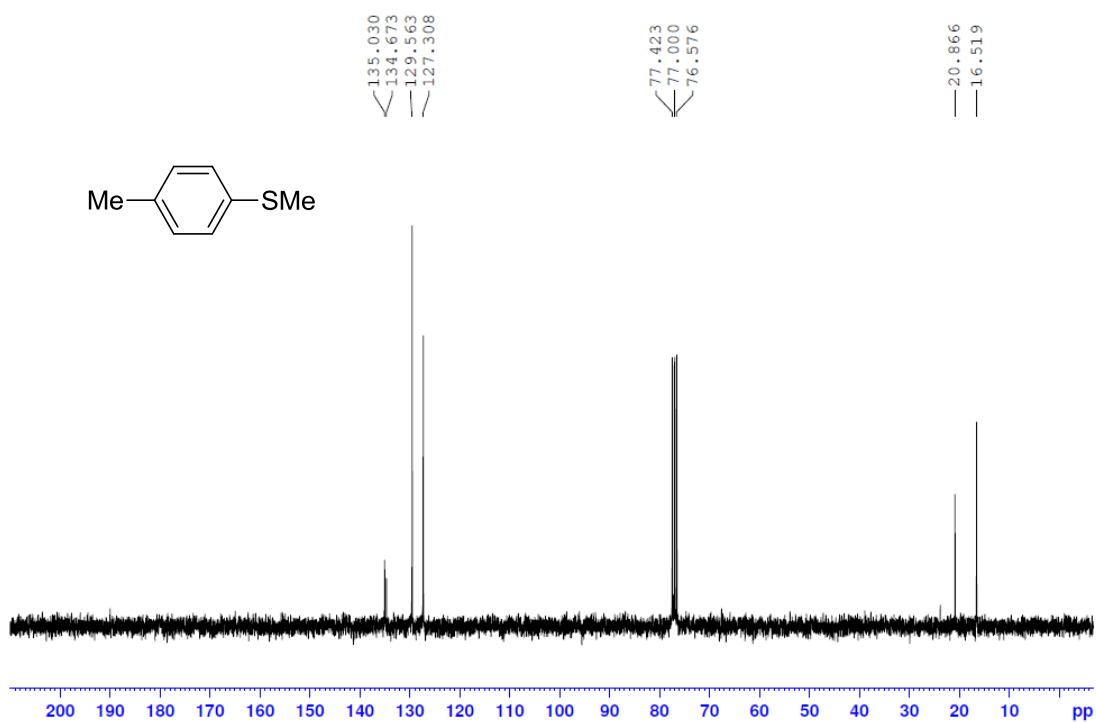

**Figure 62** <sup>13</sup>C NMR spectrum of compound **4h** (75 MHz, CDCl<sub>3</sub>)

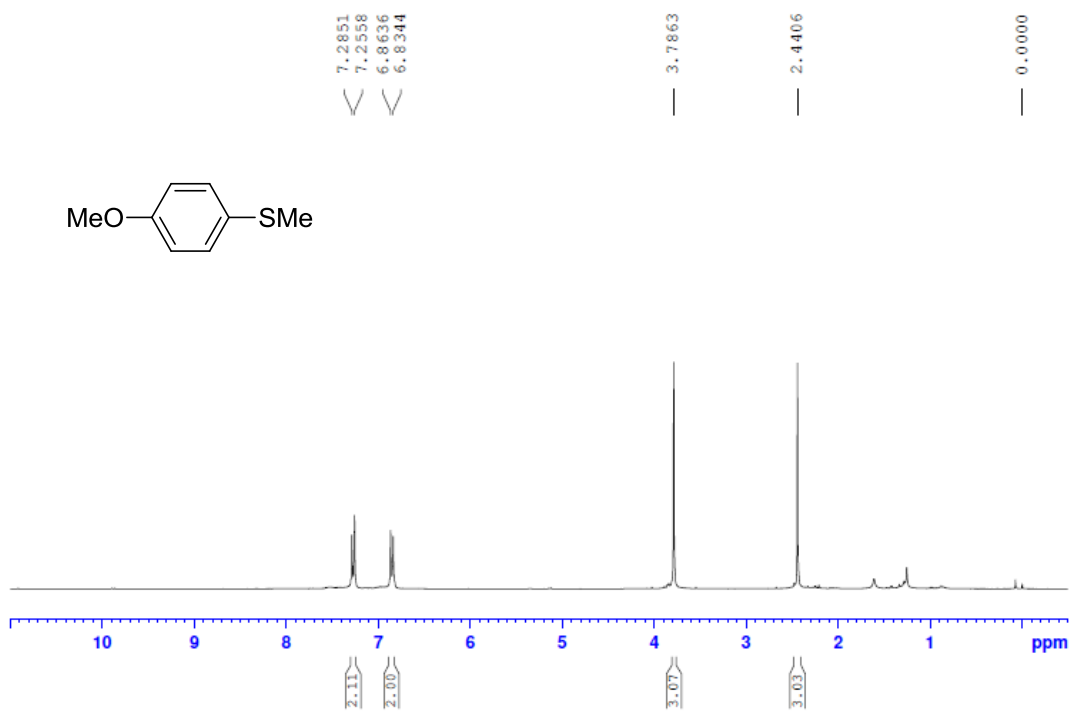

**Figure 63** <sup>1</sup>H NMR spectrum of compound **4i** (300 MHz, CDCl<sub>3</sub>)

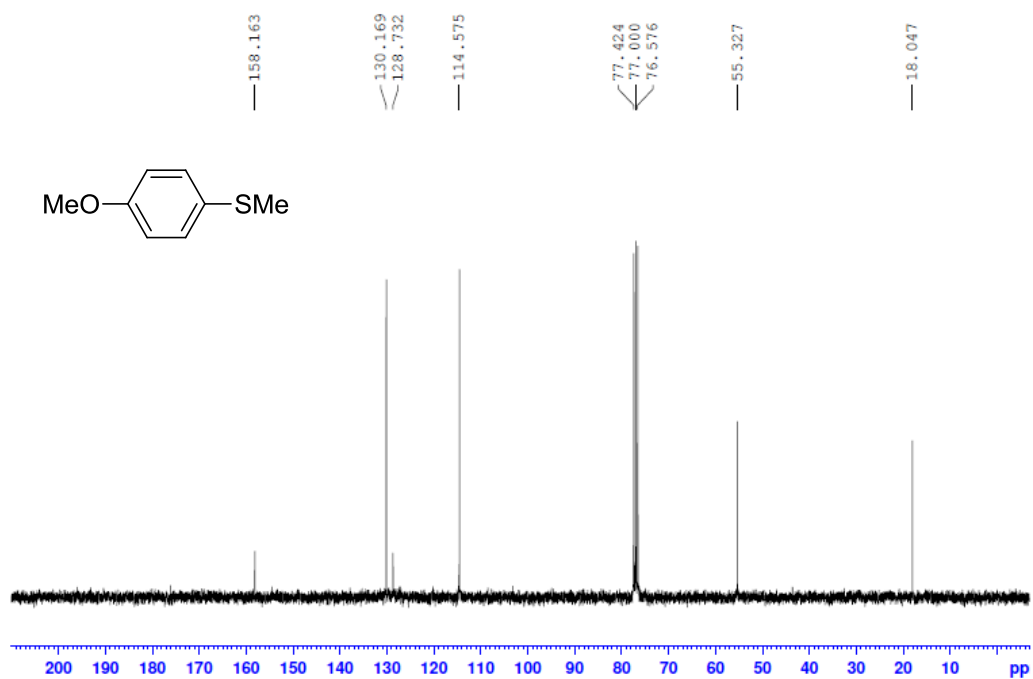

**Figure 64** <sup>13</sup>C NMR spectrum of compound **4i** (75 MHz, CDCl<sub>3</sub>)

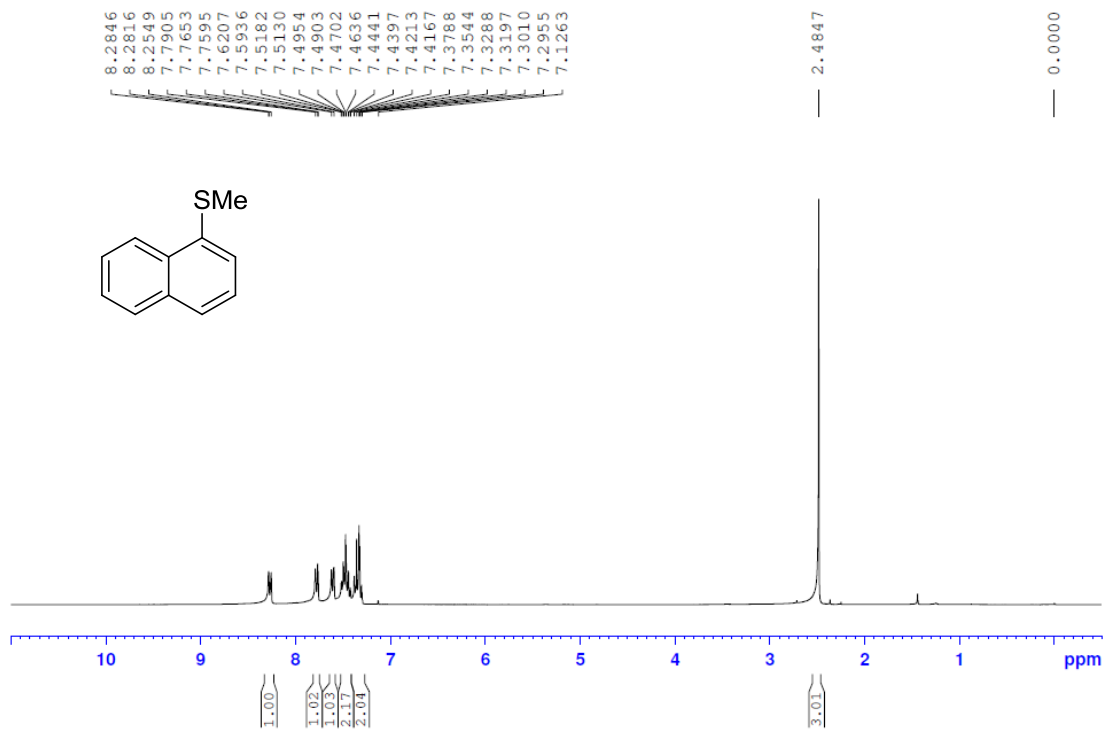

**Figure 65** <sup>1</sup>H NMR spectrum of compound **4j** (300 MHz, CDCl<sub>3</sub>)

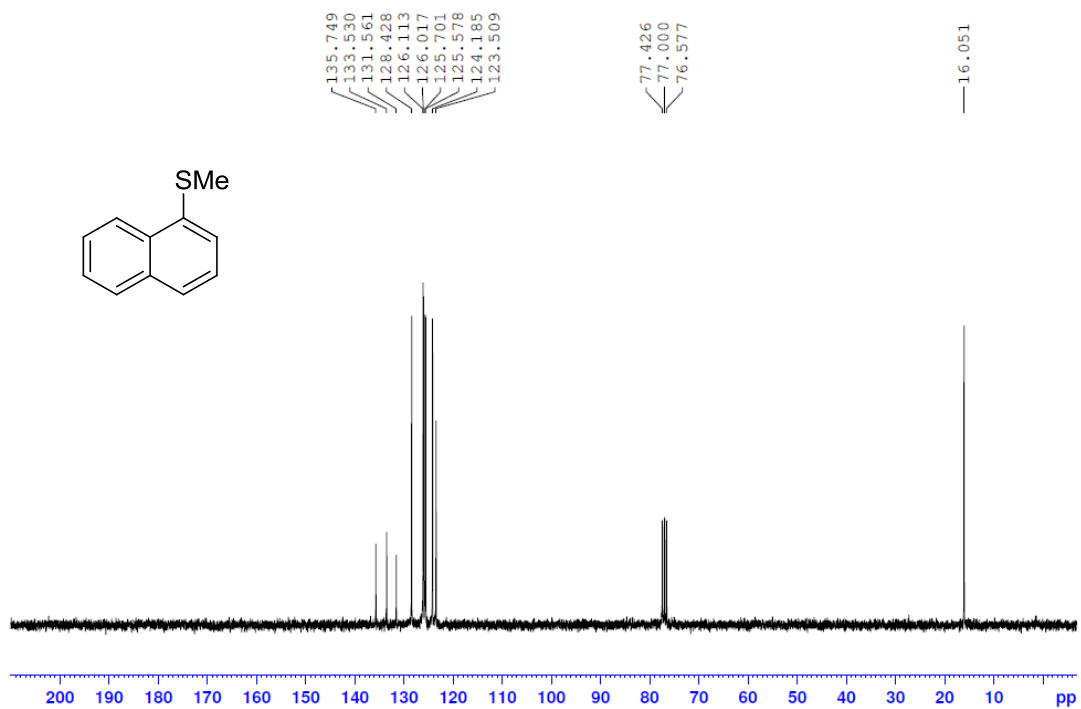

**Figure 66** <sup>13</sup>C NMR spectrum of compound **4j** (75 MHz, CDCl<sub>3</sub>)

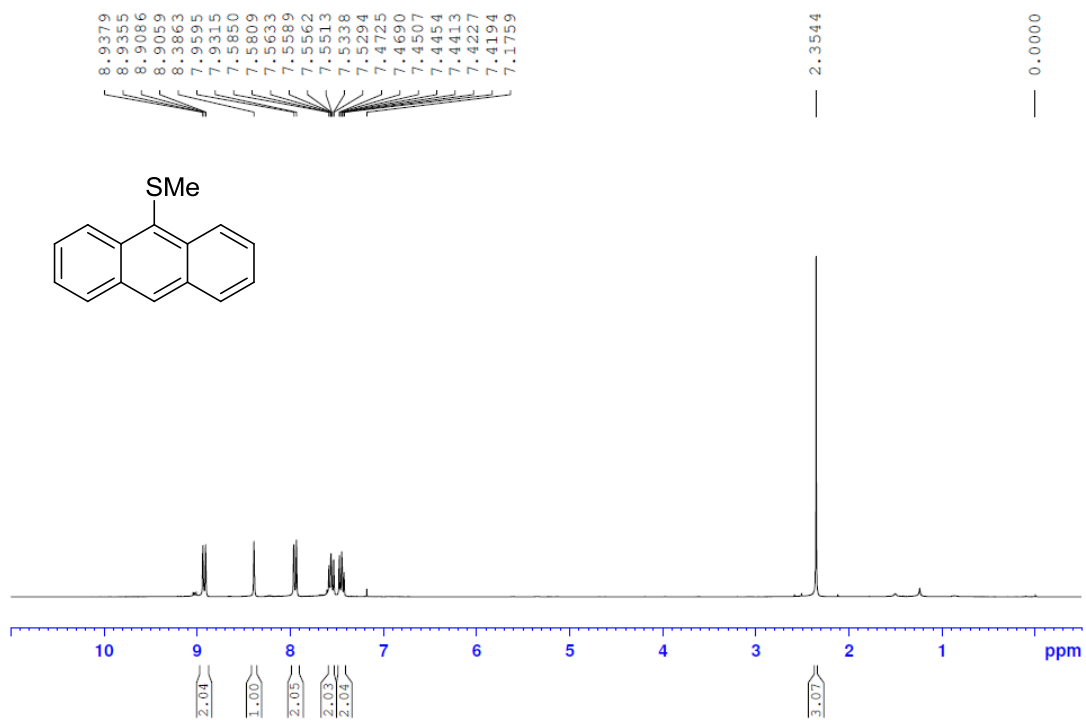

**Figure 67** <sup>1</sup>H NMR spectrum of compound **4k** (300 MHz, CDCl<sub>3</sub>)

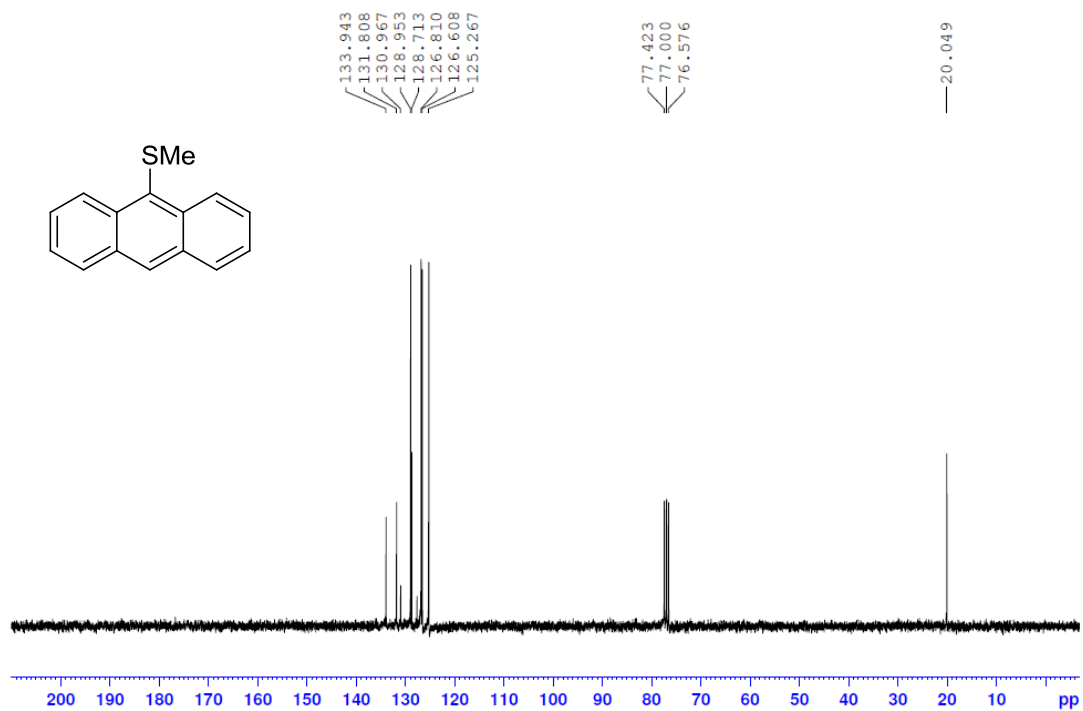

**Figure 68** <sup>13</sup>C NMR spectrum of compound **4k** (75 MHz, CDCl<sub>3</sub>)

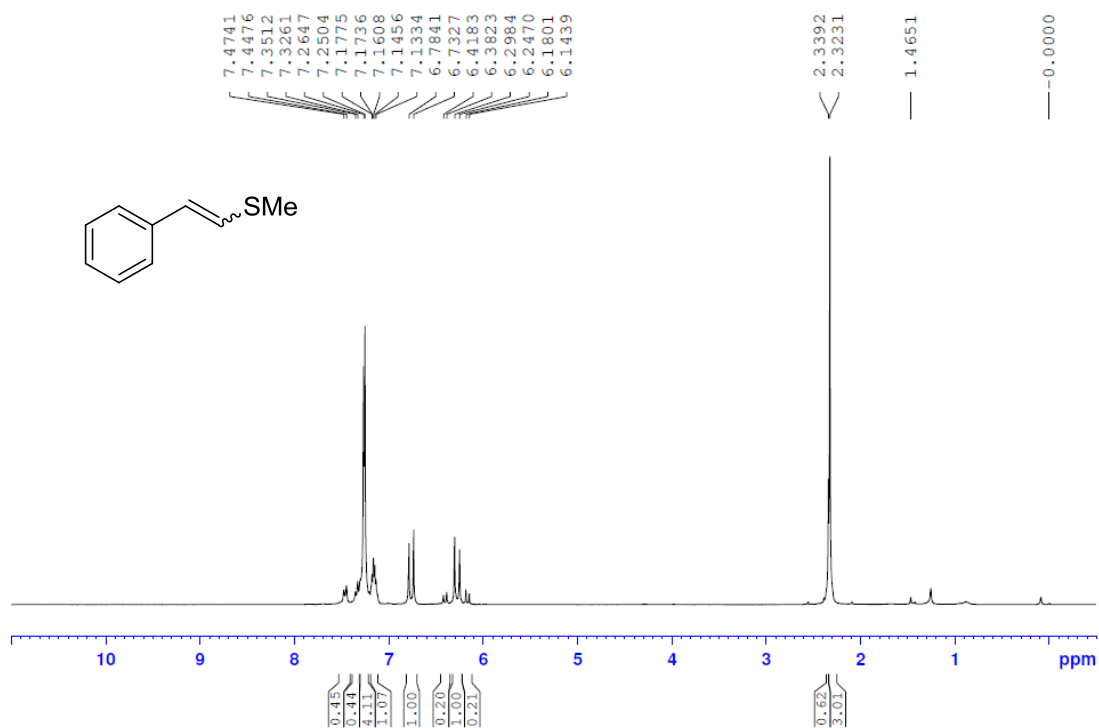

**Figure 69** <sup>1</sup>H NMR spectrum of compound **4l** (300 MHz, CDCl<sub>3</sub>)

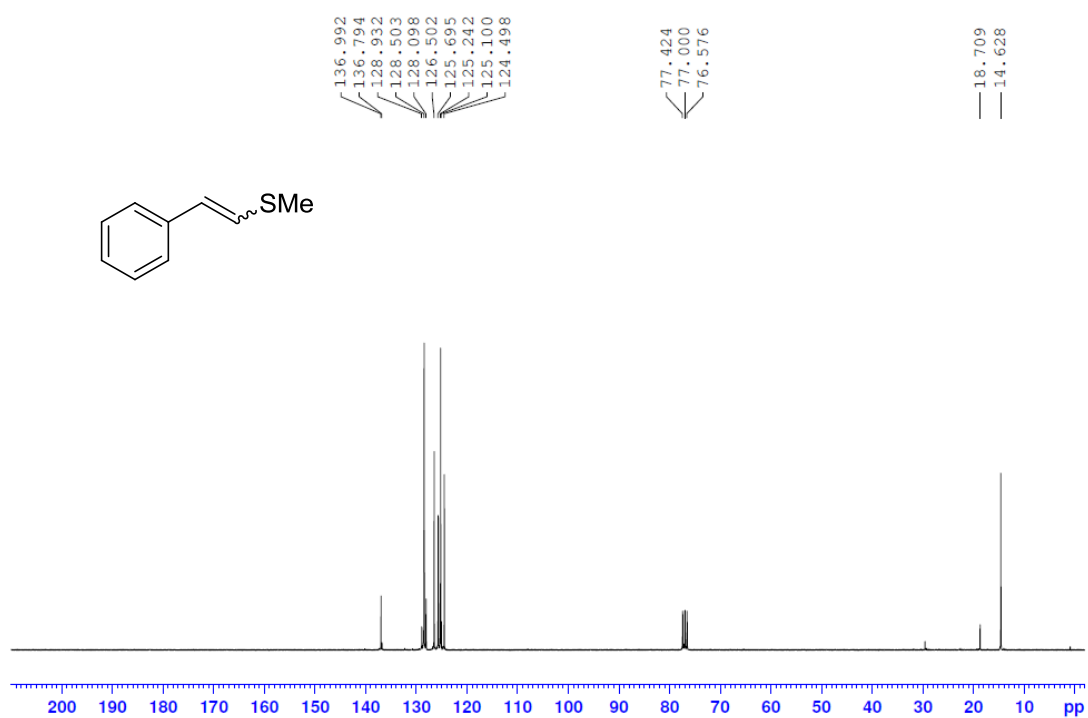

**Figure 70** <sup>13</sup>C NMR spectrum of compound **4l** (75 MHz, CDCl<sub>3</sub>)

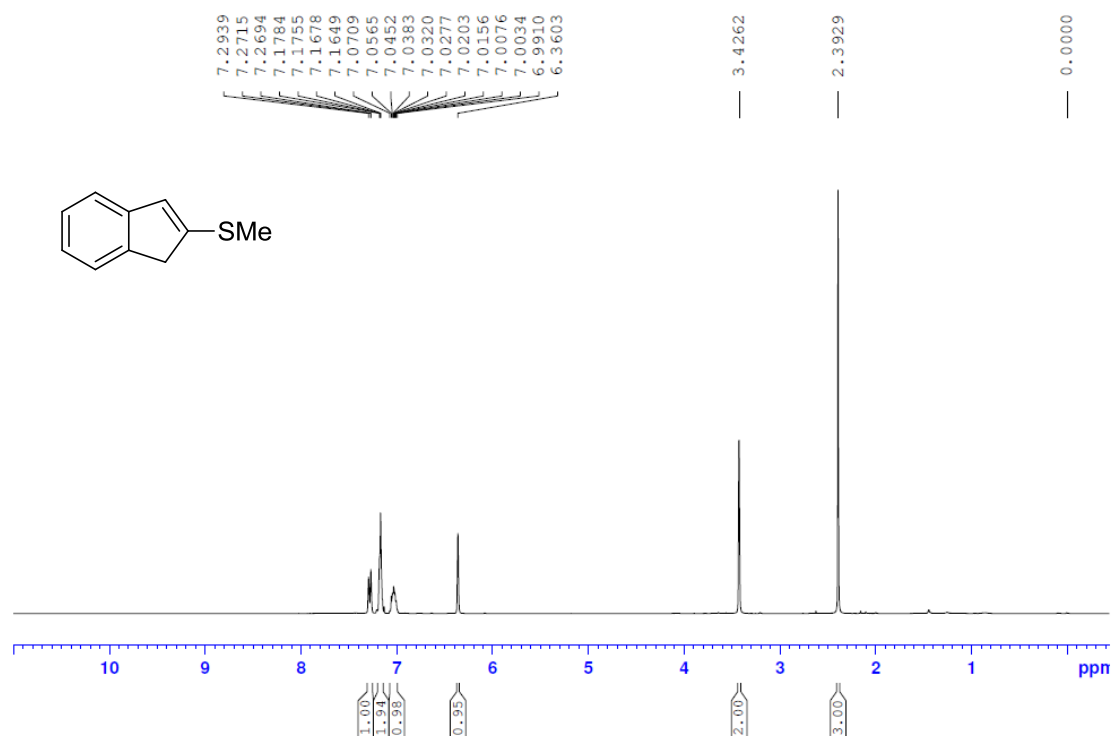

**Figure 71** <sup>1</sup>H NMR spectrum of compound **4m** (300 MHz, CDCl<sub>3</sub>)

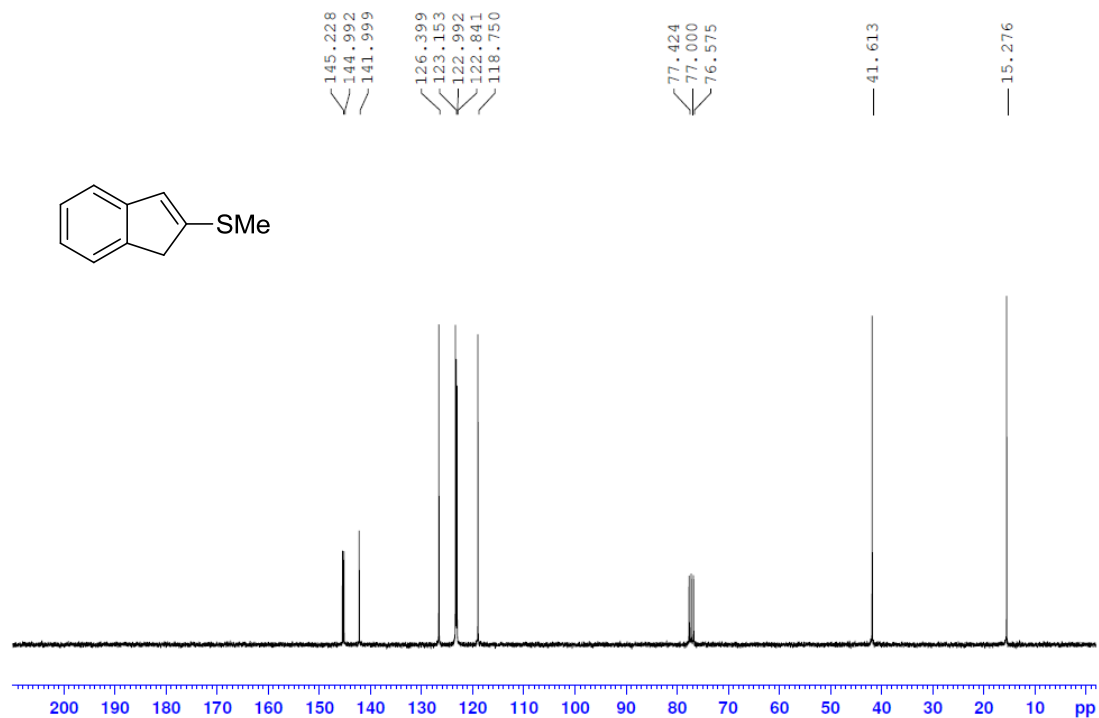

**Figure 72** <sup>13</sup>C NMR spectrum of compound **4m** (75 MHz, CDCl<sub>3</sub>)

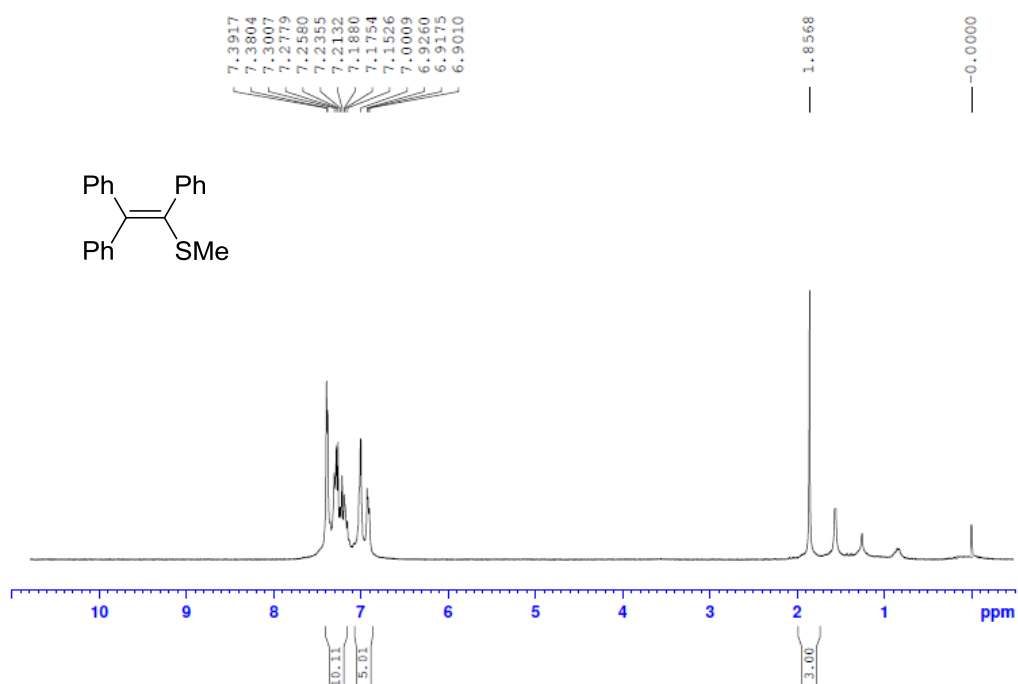

**Figure 73** <sup>1</sup>H NMR spectrum of compound **4n** (300 MHz, CDCl<sub>3</sub>)

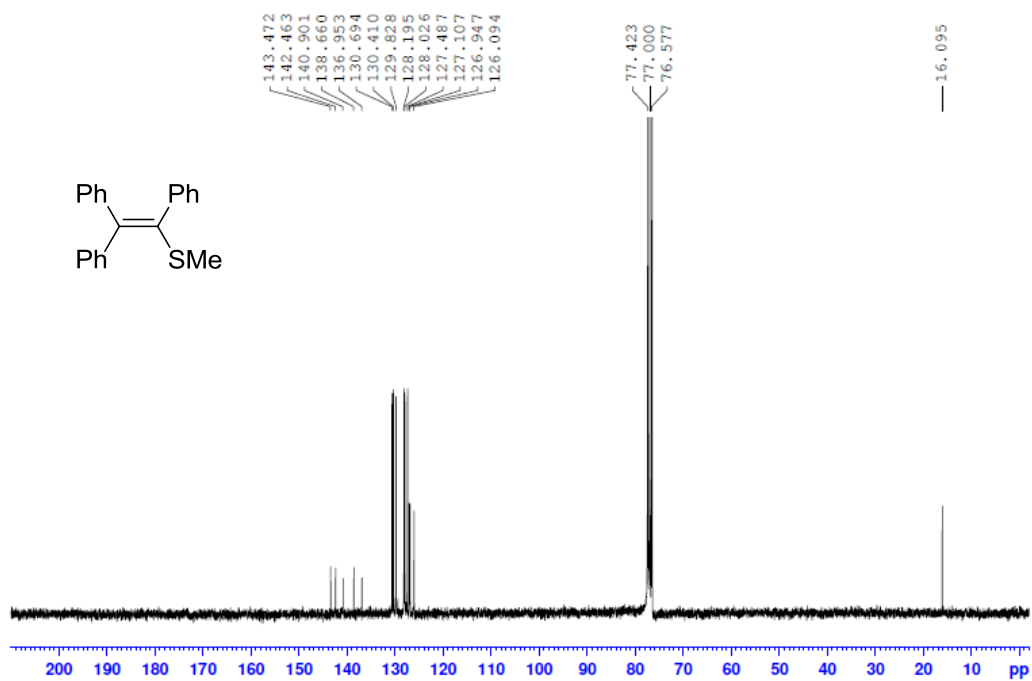

**Figure 74** <sup>13</sup>C NMR spectrum of compound **4n** (75 MHz, CDCl<sub>3</sub>)



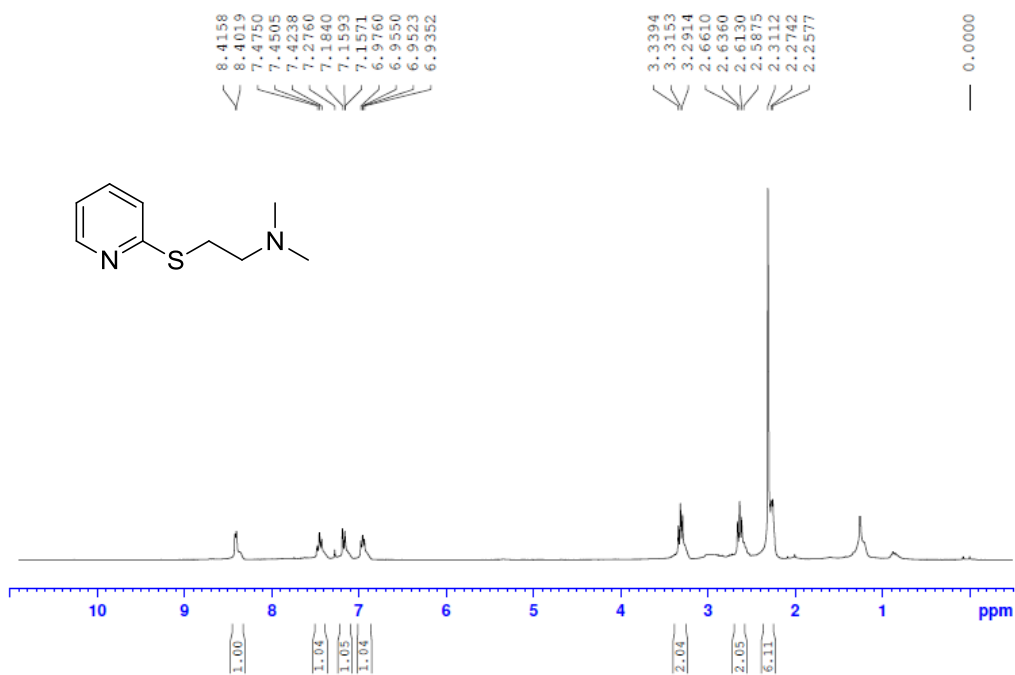

**Figure 75** <sup>1</sup>H NMR spectrum of compound **5a** (300 MHz, CDCl<sub>3</sub>)

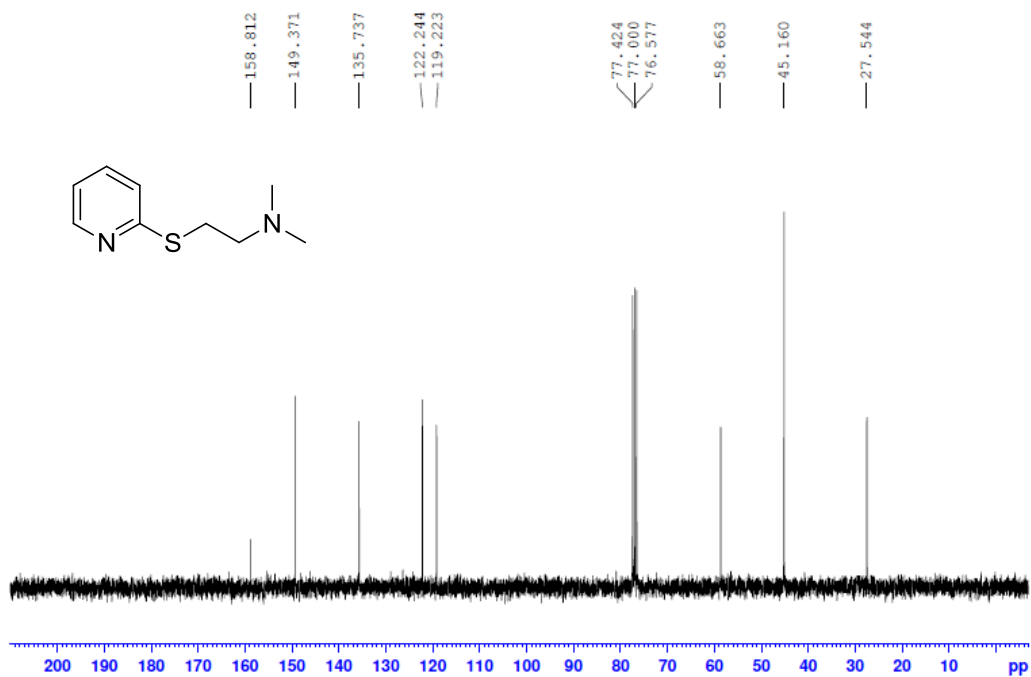

**Figure 76** <sup>13</sup>C NMR spectrum of compound **5a** (75 MHz, CDCl<sub>3</sub>)

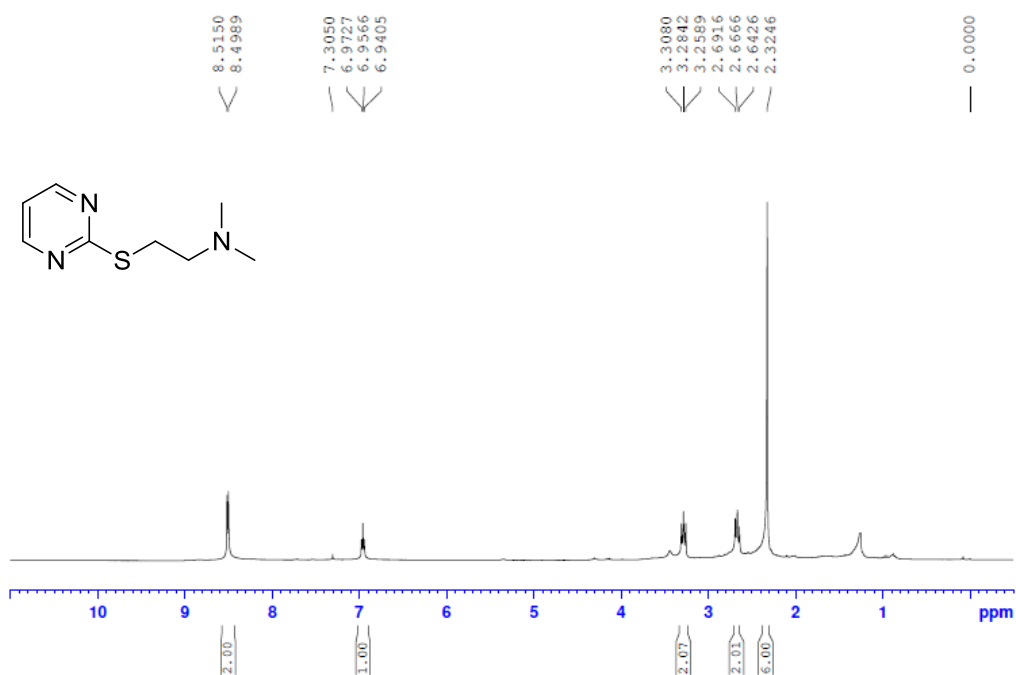

**Figure 77** <sup>1</sup>H NMR spectrum of compound **5b** (300 MHz, CDCl<sub>3</sub>)

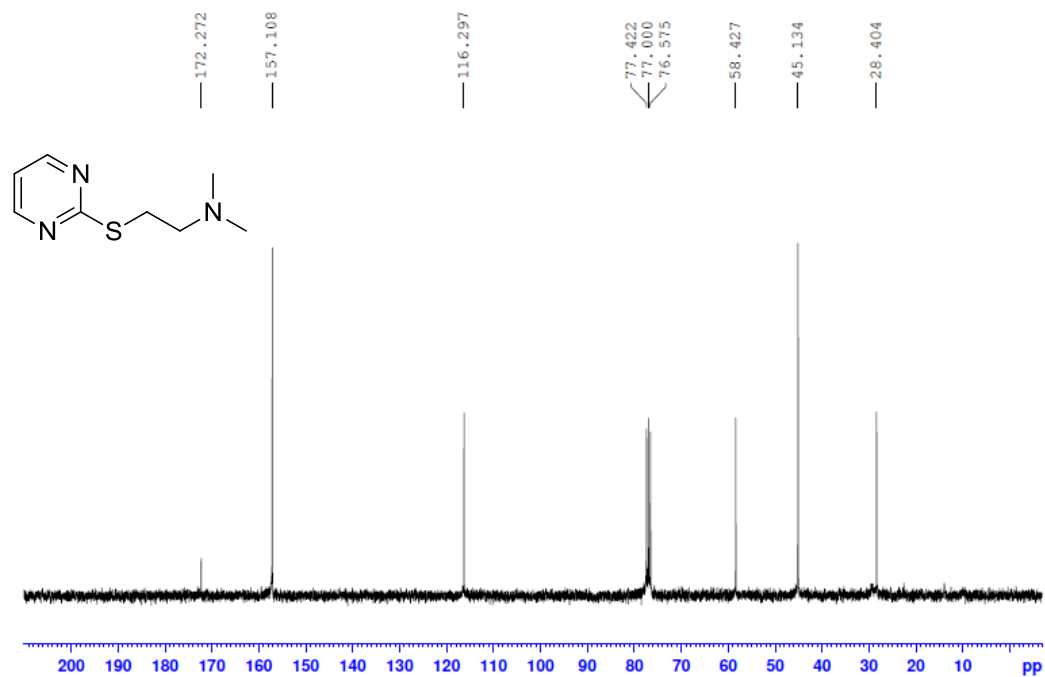

**Figure 78** <sup>13</sup>C NMR spectrum of compound **5b** (75 MHz, CDCl<sub>3</sub>)

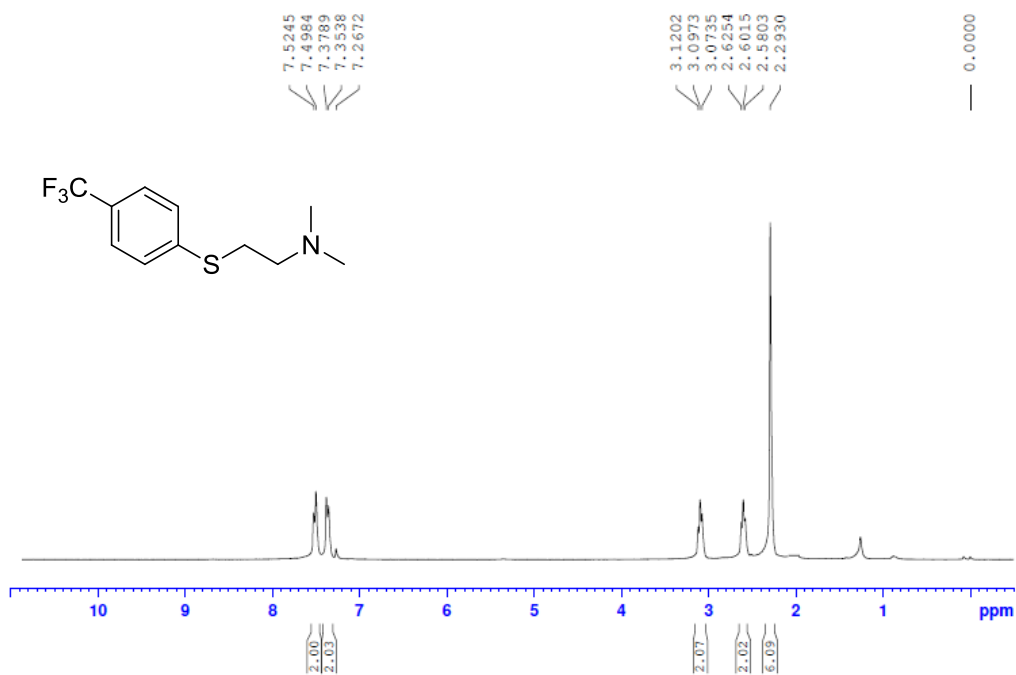

**Figure 79** <sup>1</sup>H NMR spectrum of compound **5c** (300 MHz, CDCl<sub>3</sub>)

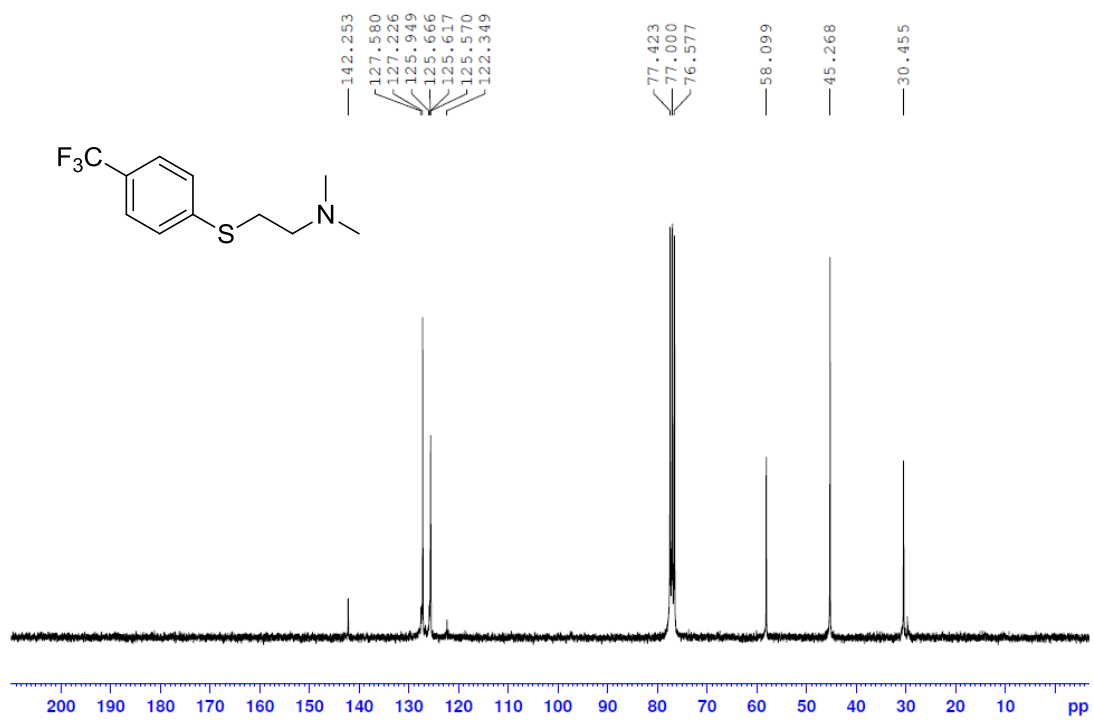

**Figure 80** <sup>13</sup>C NMR spectrum of compound **5c** (75 MHz, CDCl<sub>3</sub>)

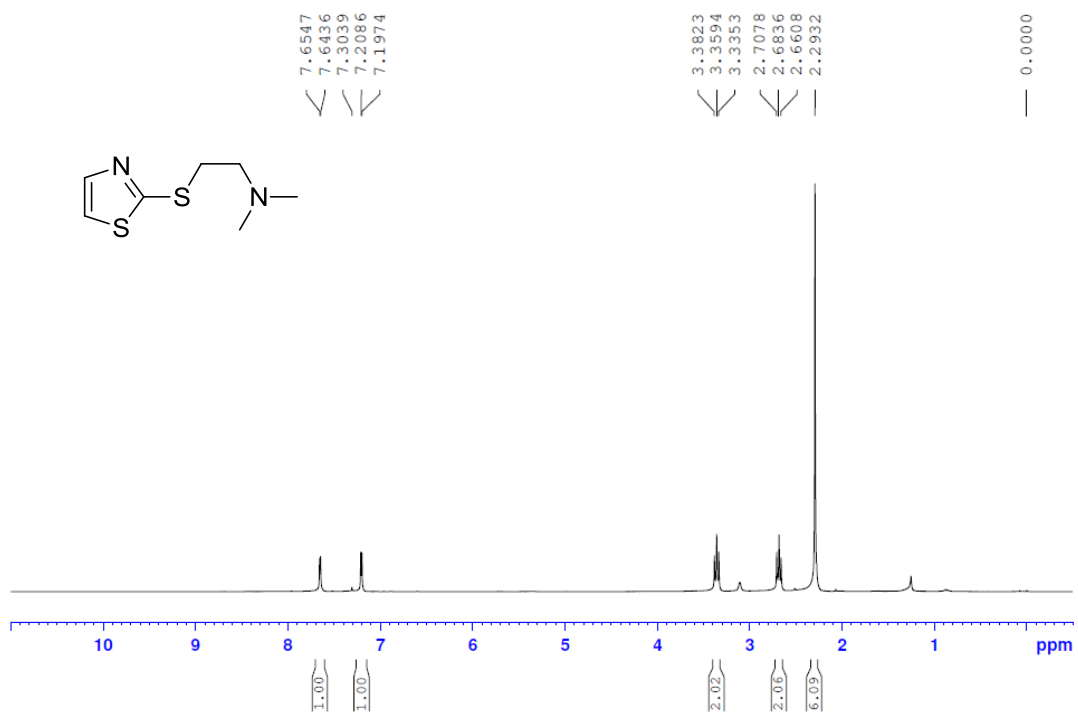

**Figure 81** <sup>1</sup>H NMR spectrum of compound **5d** (300 MHz, CDCl<sub>3</sub>)

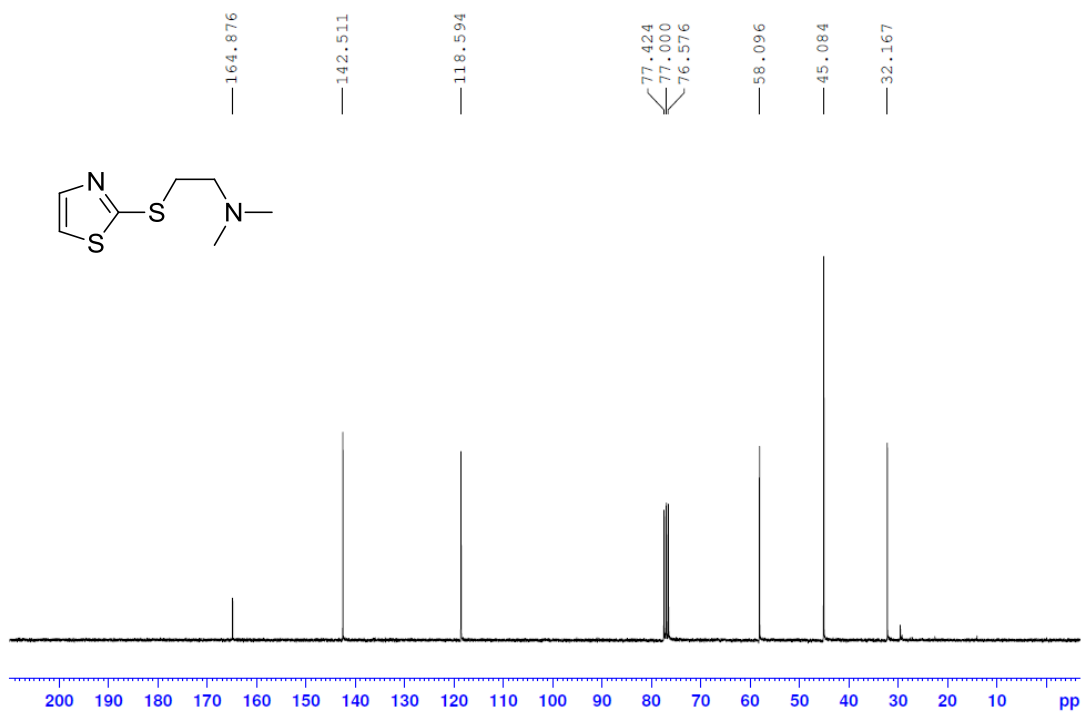

**Figure 82** <sup>13</sup>C NMR spectrum of compound **5d** (75 MHz, CDCl<sub>3</sub>)

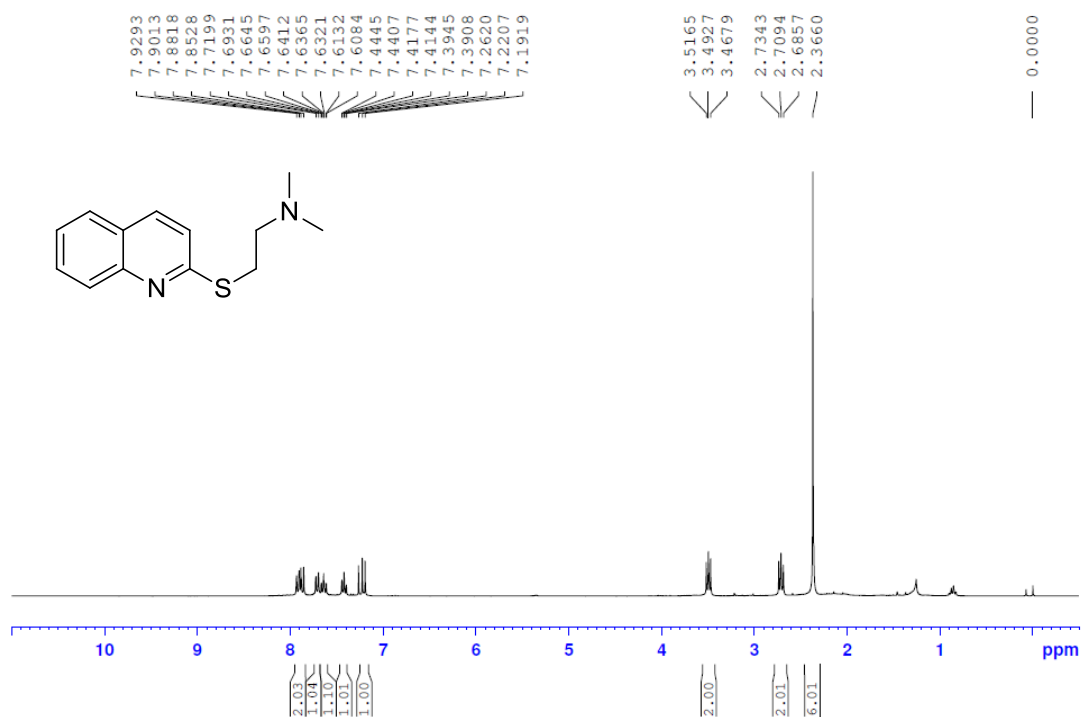

**Figure 83**  $^1\text{H}$  NMR spectrum of compound **5e** (300 MHz,  $\text{CDCl}_3$ )

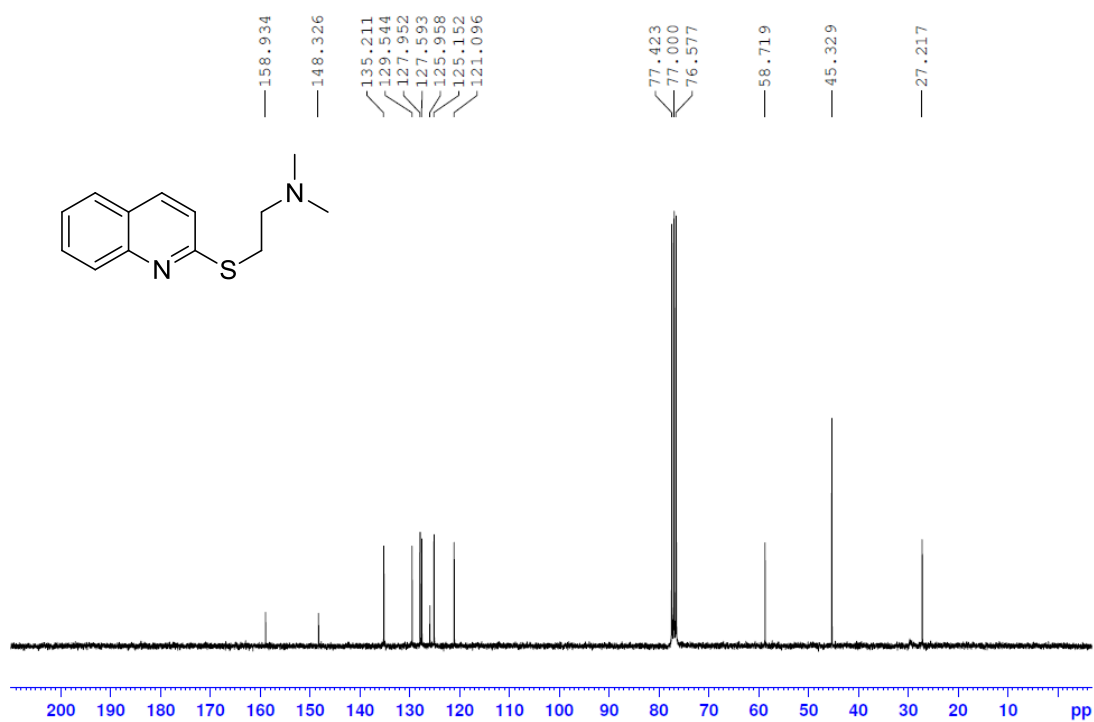

**Figure 84**  $^{13}\text{C}$  NMR spectrum of compound **5e** (75 MHz,  $\text{CDCl}_3$ )

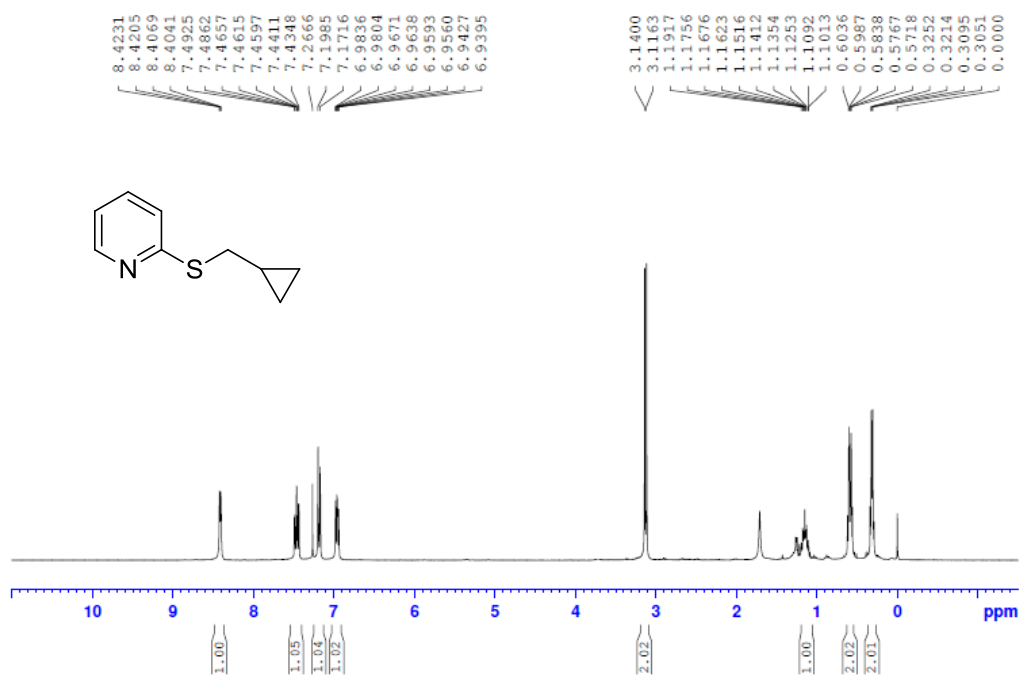

**Figure 85** <sup>1</sup>H NMR spectrum of compound **5f** (300 MHz, CDCl<sub>3</sub>)

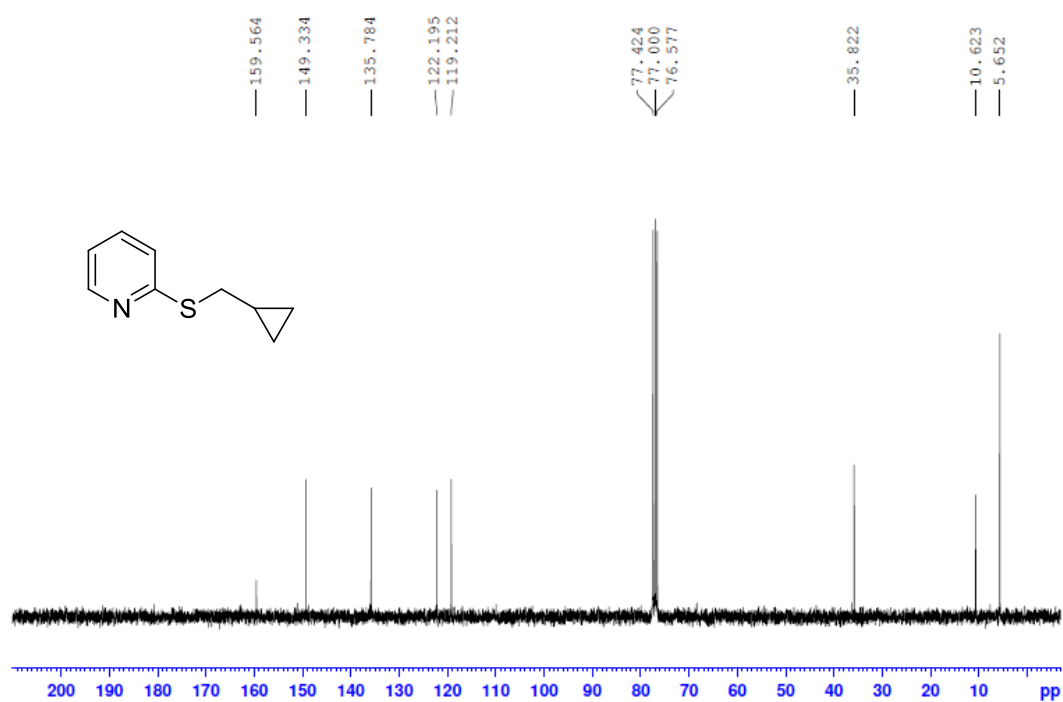

**Figure 86** <sup>13</sup>C NMR spectrum of compound **5f** (75 MHz, CDCl<sub>3</sub>)

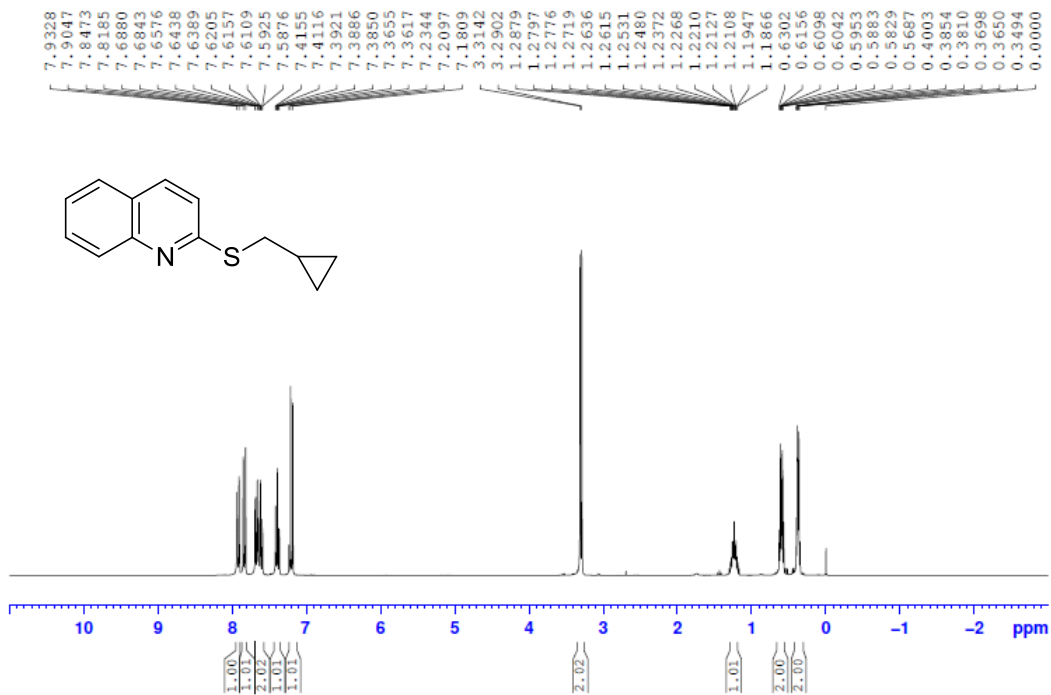

**Figure 87** <sup>1</sup>H NMR spectrum of compound **5g** (300 MHz, CDCl<sub>3</sub>)

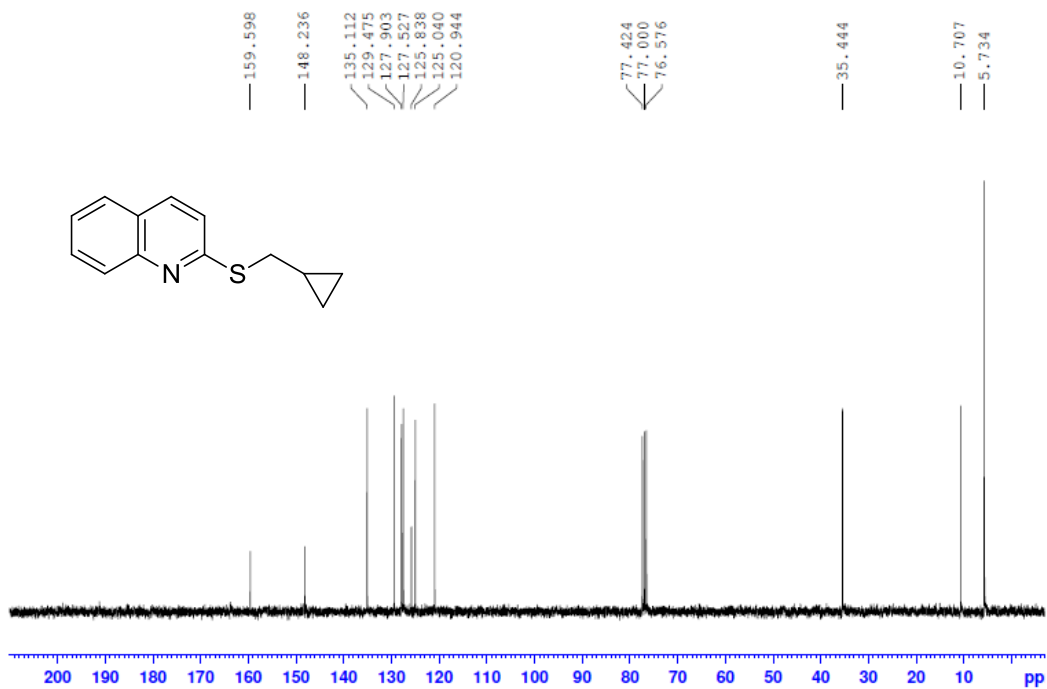

**Figure 88** <sup>13</sup>C NMR spectrum of compound **5g** (75 MHz, CDCl<sub>3</sub>)
